# Supplementary material for: Fe-catalyzed denitrative cyanoalkylation of nitroalkenes with cycloketone oxime esters via reductive C–C bond formation
Source: Royal Society of Chemistry journal article supplement (doi:10.1039/d2qo00992g), 2022-01-01

Supporting Information for:

**Fe-Catalyzed Denitrative Cyanoalkylation of Nitroalkenes with Cycloketone  
Oxime Esters via Reductive C-C Bond Formation**

Zefeng Wu, Xiangxiang Li, Tao Li, Tiebo Xiao, Yubo Jiang\* and Guiping Qin\*

Faculty of Science, Kunming University of Science and Technology, 727 Jingming  
South Road, Chenggong District, Kunming, 650500, P. R. of China

E-mail: [ybjiang@kust.edu.cn](mailto:ybjiang@kust.edu.cn), [qin-guiping@kust.edu.cn](mailto:qin-guiping@kust.edu.cn)

**CONTENTS**

|                                                                                  |     |
|----------------------------------------------------------------------------------|-----|
| 1. General experimental details and materials .....                              | S2  |
| 2. Optimization of the reaction conditions.....                                  | S2  |
| 3. General procedure.....                                                        | S7  |
| 4. Experimental characterization data for products .....                         | S8  |
| 5. Radical test.....                                                             | S16 |
| 6. References.....                                                               | S17 |
| 7. Copies for $^1\text{H}$ NMR, $^{13}\text{C}$ NMR spectra of the products..... | S19 |

## 1. General experimental details and materials

All non-aqueous reactions and manipulations were using standard Schlenk techniques. All solvents before use were dried and degassed by standard methods and stored under argon atmosphere. All reactions were monitored by TLC with silica gel-coated plates. For chromatography, 200-300 mesh silica gel (Qingdao, China) was employed.  $^1\text{H}$  NMR,  $^{13}\text{C}$  NMR spectra were measured in  $\text{CDCl}_3$  and recorded on Bruker Avance III 500 MHz, and Bruker Avance III HD (600 MHz, Bruker BioSpin, Switzerland) spectrometer. Chemical shifts ( $\delta$ ) were given in ppm, referenced to the residual proton resonance of  $\text{CDCl}_3$  (7.26), to the carbon resonance of  $\text{CDCl}_3$  (77.16). Coupling constants ( $J$ ) were given in Hertz (Hz). The term m, q, t, d, s referred to multiplet, quartet, triplet, doublet, singlet. High resolution mass spectra were recorded on a high-resolution mass spectrometer using electrospray ionization (ESI) techniques. Catalysts, reductants, ligands, additives and solvents were all purchased from Energy.

**Synthesis of substrates (1a-1o):** The substrates **1a-1o** were prepared according to known methods. <sup>[1]</sup>

**Synthesis of substrates (2a-2j):** The substrates **2a-2j** were prepared according to known methods. <sup>[2]</sup>

## 2. Optimization of the reaction conditions

(*E*)-(2-nitrovinyl)benzene **1a** (44.7 mg, 0.30 mmol) and cyclobutanone *O*-(4-(trifluoromethyl)benzoyl) oxime **2a** (115.7 mg, 0.45 mmol), catalyst ( $x$  mol%), ligand ( $x$  mol%), reductant ( $x$  equiv.), addition ( $x$  equiv.) and solvent (1.0 mL) were added to a flame-dried Young-type tube. The mixture was degassed by the freeze-thaw method, and then stirred under argon at designed temperature for designed hours. After cooling to room temperature, solvent was removed under reduced pressure, and the residue was purified by flash column chromatography on silica gel and eluted with ethyl acetate/petroleum ether (1/20) to afford the desired product **3aa**. For solvent with high boiling point, the reaction mixture was treated with saturated  $\text{NH}_4\text{Cl}$  aqueous solution (10 mL) and extracted with ethyl acetate ( $4 \times 10$  mL). The solvent was removed under reduced pressure, and the residue was purified by flash column chromatography on silica gel and eluted with ethyl acetate/petroleum ether (1/50-1/2) to afford the desired products **3aa**.

**Table S1. Screening of the catalyst <sup>a</sup>**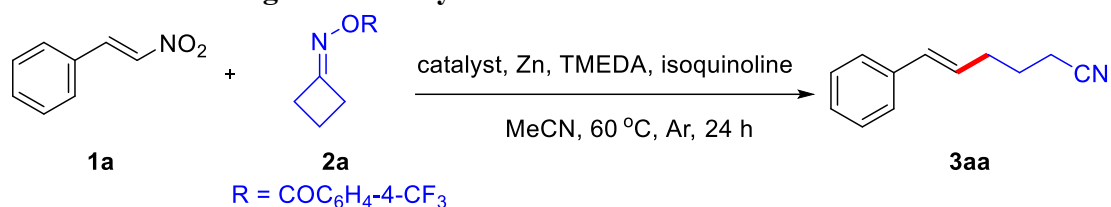

| entry     | catalyst                        | yield (%) |
|-----------|---------------------------------|-----------|
| 1         | Ni(acac) <sub>2</sub>           | ND        |
| 2         | NiBr <sub>2</sub>               | 10        |
| 3         | Cu(acac) <sub>2</sub>           | ND        |
| 4         | CuBr <sub>2</sub>               | 34        |
| 5         | Fe(acac) <sub>2</sub>           | 49        |
| 6         | Ferrocene                       | 8         |
| 7         | FeCl <sub>2</sub>               | 44        |
| 8         | FeCl <sub>3</sub>               | 45        |
| 9         | Fe(OTf) <sub>2</sub>            | 43        |
| 10        | Fe(OTf) <sub>3</sub>            | 42        |
| 11        | FeC <sub>2</sub> O <sub>4</sub> | 49        |
| <b>12</b> | <b>Fe(OAc)<sub>2</sub></b>      | <b>51</b> |

<sup>a</sup> Reaction conditions: **1a** (44.7 mg, 0.30 mmol), **2a** (115.7 mg, 0.45 mmol), catalyst (0.03 mmol, 10 mol%), Zn (0.3 mmol, 1.0 equiv.), TMEDA (0.0303 mmol, 10.1 mol%), isoquinoline (2.0 equiv.) and MeCN (1.0 mL) under Ar at 60 °C for 24 h, isolated yield.

**Table S2. Screening of the ligand <sup>a</sup>**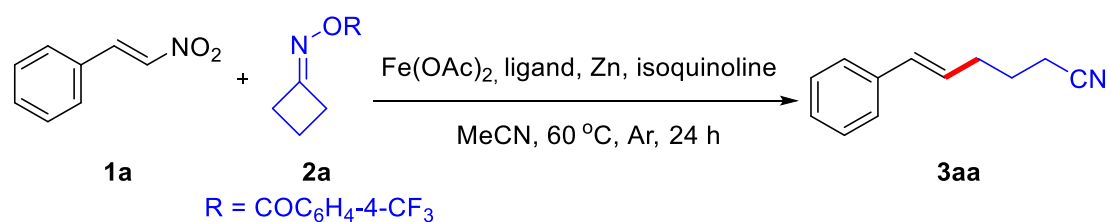

| entry    | ligand                  | yield (%) |
|----------|-------------------------|-----------|
| 1        | TMEDA                   | 51        |
| 2        | DPPM                    | 49        |
| 3        | DPPE                    | 46        |
| 4        | DPPP                    | 44        |
| 5        | DPPB                    | 46        |
| 6        | DPPF                    | 53        |
| 7        | Xantphos                | 53        |
| <b>8</b> | <b>2,2'-biquinoline</b> | <b>57</b> |
| 9        | BINAP                   | 51        |

|    |                     |    |
|----|---------------------|----|
| 10 | S-phos              | 51 |
| 11 | PCy <sub>3</sub>    | 23 |
| 12 | P(OMe) <sub>3</sub> | 44 |
| 13 | PPh <sub>3</sub>    | 50 |
| 14 | dmbpy               | 51 |
| 15 | 1,10-phenanthroline | 48 |
| 16 | DMAP                | 52 |

<sup>a</sup> Reaction conditions: **1a** (44.7 mg, 0.30 mmol), **2a** (115.7 mg, 0.45 mmol), Fe(OAc)<sub>2</sub> (0.03 mmol, 10 mol%), Zn (0.3 mmol, 1.0 equiv.), ligand (0.0303 mmol, 10.1 mol%), isoquinoline (2.0 equiv.) and MeCN (1.0 mL) under Ar at 60 °C for 24 h, isolated yield.

**Table S3. Screening of mixed solvent <sup>a</sup>**

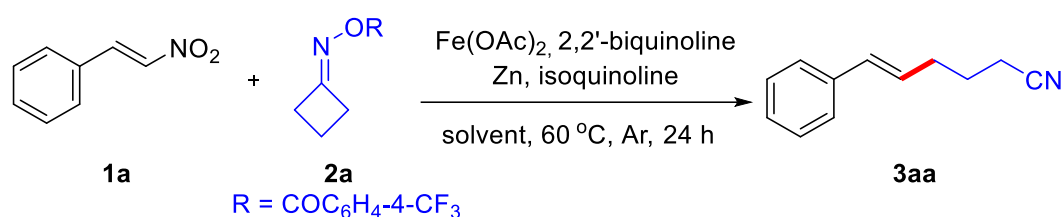

| entry    | mixed solvent (1 : 1) | yield (%) |
|----------|-----------------------|-----------|
| <b>1</b> | <b>DMA : PhMe</b>     | <b>57</b> |
| 2        | DMA : THF             | 53        |
| 3        | DMA : MeCN            | 55        |
| 4        | DMA : DMF             | 54        |
| 5        | DMA : DMSO            | 48        |
| 6        | DMA : DCE             | 55        |
| 7        | DMA : NMP             | 54        |
| 8        | DMA : Dioxane         | 54        |
| 9        | DMA : GDME            | 56        |

<sup>a</sup> Reaction conditions: **1a** (44.7 mg, 0.30 mmol), **2a** (115.7 mg, 0.45 mmol), Fe(OAc)<sub>2</sub> (0.03 mmol, 10 mol%), Zn (0.3 mmol, 1.0 equiv.), 2,2'-biquinoline (0.0303 mmol, 10.1 mol%), isoquinoline (2.0 equiv.) and mixed solvent (1.0 mL) under Ar at 60 °C for 24 h, isolated yield.

**Table S4. Screening of the ratio of DMA/PhMe <sup>a</sup>**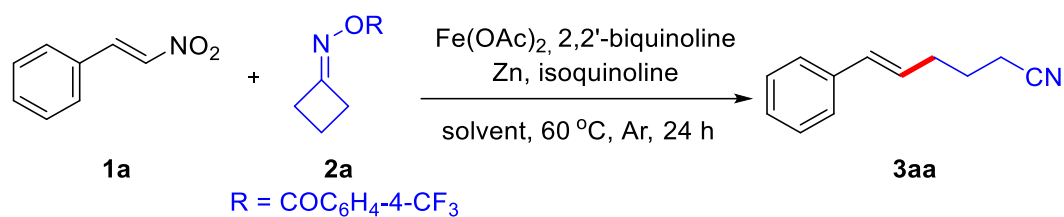

| entry    | solvent (V <sub>DMA</sub> : V <sub>PhMe</sub> ) | yield (%) |
|----------|-------------------------------------------------|-----------|
| 1        | 1 : 4                                           | 54        |
| 2        | 2 : 3                                           | 57        |
| 3        | 1 : 1                                           | 57        |
| 3        | 3 : 2                                           | 55        |
| <b>4</b> | <b>4 : 1</b>                                    | <b>60</b> |
| 5        | 10 : 1                                          | 57        |
| 6        | 20 : 1                                          | 56        |
| 7        | 50 : 1                                          | 55        |
| 8        | 100 : 1                                         | 51        |

<sup>a</sup> Reaction conditions: **1a** (44.7 mg, 0.30 mmol), **2a** (115.7 mg, 0.45 mmol), Fe(OAc)<sub>2</sub> (0.03 mmol, 10 mol%), Zn (0.3 mmol, 1.0 equiv.), 2,2'-biquinoline (0.0303 mmol, 10.1 mol%), isoquinoline (2.0 equiv.) and DMA/PhMe (1.0 mL) under Ar at 60 °C for 24 h, isolated yield.

**Table S5. Screening the ratio of 1a and 2a <sup>a</sup>**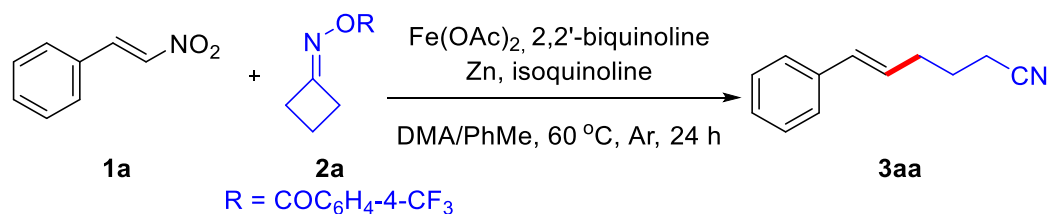

| entry    | <b>1a</b> : <b>2a</b> | yield (%) |
|----------|-----------------------|-----------|
| <b>1</b> | <b>1 : 1.5</b>        | <b>60</b> |
| 2        | 1 : 2.0               | 54        |
| 3        | 1 : 3.0               | 51        |
| 4        | 1.5 : 1               | 52        |
| 5        | 2.0 : 1               | 54        |
| 6        | 3.0 : 1               | 56        |

<sup>a</sup> Reaction conditions: 1.0 equiv. is 0.30 mmol, Fe(OAc)<sub>2</sub> (0.03 mmol, 10 mol%), Zn (0.3 mmol, 1.0 equiv.), 2,2'-biquinoline (0.0303 mmol, 10.1 mol%), isoquinoline (2.0 equiv.) and DMA/PhMe (1.0 mL, DMA/PhMe = 0.8 mL DMA / 0.2 mL PhMe) under Ar at 60 °C for 24 h, isolated yield.

**Table S6. Screening loading of the isoquinoline<sup>a</sup>**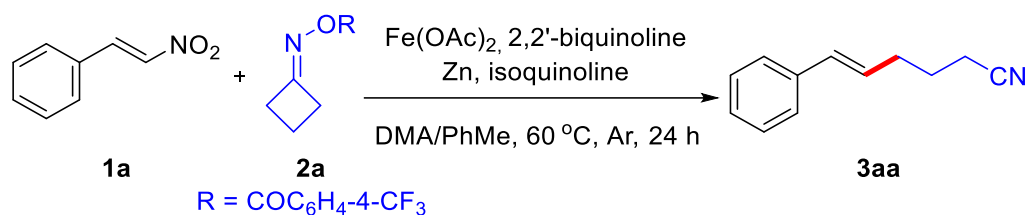

| entry    | isoquinoline (equiv.) | yield (%) |
|----------|-----------------------|-----------|
| 1        | 0.2                   | 53        |
| 2        | 0.5                   | 53        |
| 3        | 1.0                   | 56        |
| <b>4</b> | <b>2.0</b>            | <b>60</b> |
| 5        | 3.0                   | 59        |
| 6        | 4.0                   | 56        |
| 7        | 5.0                   | 53        |

<sup>a</sup> Reaction conditions: **1a** (44.7 mg, 0.30 mmol), **2a** (115.7 mg, 0.45 mmol), Fe(OAc)<sub>2</sub> (0.03 mmol, 10 mol%), Zn (0.3 mmol, 1.0 equiv.), 2,2'-biquinoline (0.0303 mmol, 10.1 mol%), isoquinoline (x equiv.) and DMA/PhMe (1.0 mL, DMA/PhMe = 0.8 mL DMA / 0.2 mL PhMe) under Ar at 60 °C for 24 h, isolated yield.

**Table S7. Screening of temperature<sup>a</sup>**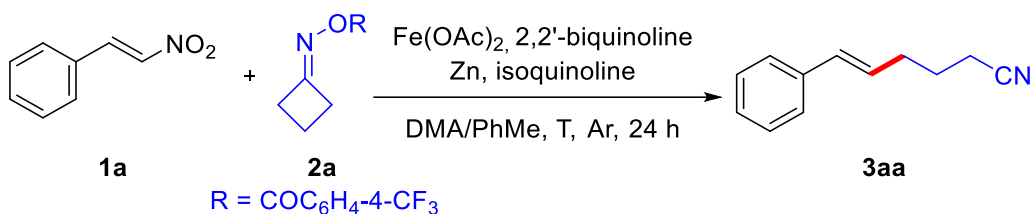

| entry    | T (°C)    | yield (%) |
|----------|-----------|-----------|
| 1        | r.t.      | 51        |
| 2        | 40        | 52        |
| <b>3</b> | <b>60</b> | <b>60</b> |
| 4        | 80        | 51        |
| 5        | 100       | 49        |

<sup>a</sup> Reaction conditions: **1a** (44.7 mg, 0.30 mmol), **2a** (115.7 mg, 0.45 mmol), Fe(OAc)<sub>2</sub> (0.03 mmol, 10 mol%), Zn (0.3 mmol, 1.0 equiv.), 2,2'-biquinoline (0.0303 mmol, 10.1 mol%), isoquinoline (2.0 equiv.) and DMA/PhMe (1.0 mL, DMA/PhMe = 0.8 mL DMA / 0.2 mL PhMe) under Ar at T °C for 24 h, isolated yield.

**Table S8. Screening of time <sup>a</sup>**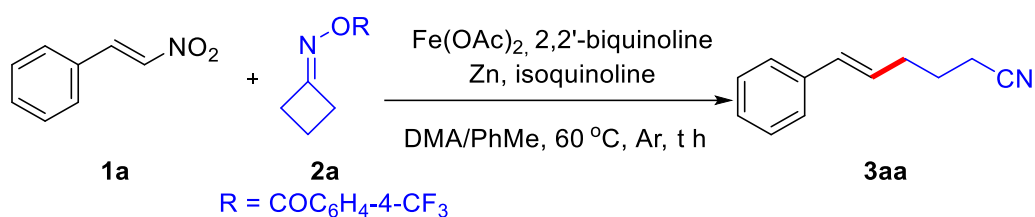

| entry    | t (h)     | yield (%) |
|----------|-----------|-----------|
| 1        | 6         | 50        |
| 2        | 12        | 56        |
| 3        | 18        | 58        |
| <b>4</b> | <b>24</b> | <b>60</b> |

<sup>a</sup> Reaction conditions: **1a** (44.7 mg, 0.30 mmol), **2a** (115.7 mg, 0.45 mmol), Fe(OAc)<sub>2</sub> (0.03 mmol, 10 mol%), Zn (0.3 mmol, 1.0 equiv.), 2,2'-biquinoline (0.0303 mmol, 10.1 mol%), isoquinoline (2.0 equiv.) and DMA/PhMe (1.0 mL, DMA/PhMe = 0.8 mL DMA / 0.2 mL PhMe) under Ar at 60 °C for t h, isolated yield.

**Table S9. Control experiment <sup>a</sup>**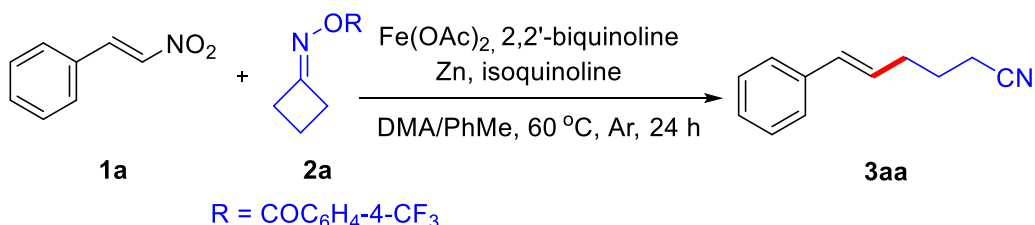

| entry | deviation from "standard" conditions | yield (%) |
|-------|--------------------------------------|-----------|
| 1     | No Fe(OAc) <sub>2</sub>              | ND        |
| 2     | No Zn                                | Trace     |
| 3     | No 2,2'-biquinoline                  | 50        |
| 4     | No isoquinoline                      | 51        |

<sup>a</sup> Reaction conditions: **1a** (44.7 mg, 0.30 mmol), **2a** (115.7 mg, 0.45 mmol), Fe(OAc)<sub>2</sub> (0.03 mmol, 10 mol%), Zn (0.3 mmol, 1.0 equiv.), 2,2'-biquinoline (0.0303 mmol, 10.1 mol%), isoquinoline (2.0 equiv.), DMA/PhMe (1.0 mL, DMA/PhMe = 0.8 mL DMA / 0.2 mL PhMe) under Ar at 60 °C for 24 h, isolated yield.

### 3. General procedure

Nitroalkenes **1** (0.3 mmol) and cycloketone oxime esters **2** (0.45 mmol), Fe(OAc)<sub>2</sub> (0.03 mmol, 10 mol%), Zn (0.3 mmol, 1.0 equiv.), 2,2'-biquinoline (0.0303 mmol, 10.1 mol%), isoquinoline (0.6 mmol, 2.0 equiv.), DMA/PhMe (1.0 mL, DMA/PhMe = 0.8

mL DMA / 0.2 mL PhMe) were added to a flame-dried Young-type tube. The mixture was degassed by the freeze-thaw method, and then stirred under Ar at 60 °C for 24 hours. After cooling to room temperature, the reaction mixture was treated with saturated NH<sub>4</sub>Cl aqueous solution (10 mL) and extracted with ethyl acetate (4 × 10 mL). The solvent was removed under reduced pressure, and the residue was purified by flash column chromatography on silica gel and eluted with ethyl acetate/petroleum ether (1/50-1/2) to afford the desired products **3**.

#### 4. Experimental characterization data for products

##### (*E*)-6-phenylhex-5-enenitrile (**3aa**)<sup>[3]</sup>:

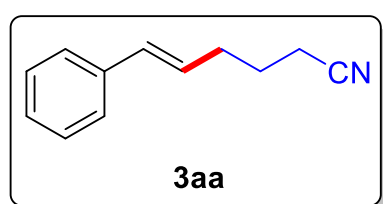

The title compound was prepared according to the general procedure and purified by column chromatography to give a colorless oil (30.8 mg, 60% yield). <sup>1</sup>H NMR (600 MHz, CDCl<sub>3</sub>) δ 7.22 – 7.28 (m, 4H), 7.13 – 7.17 (m, 1H), 6.39 (d, *J* = 15.8 Hz, 1H), 6.03 – 6.08 (m, 1H), 2.28 – 2.32 (m, 4H), 1.74 – 1.79 (m, 2H). <sup>13</sup>C NMR (151 MHz, CDCl<sub>3</sub>) δ 137.1, 132.1, 128.7, 127.7, 127.4, 126.2, 119.7, 31.8, 25.0, 16.5.

##### (*E*)-6-(*p*-tolyl)hex-5-enenitrile (**3ba**)<sup>[4]</sup>:

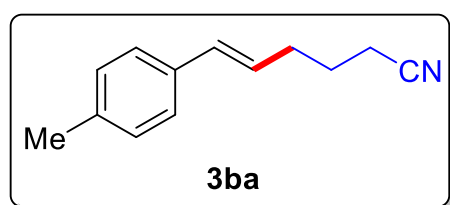

The title compound was prepared according to the general procedure and purified by column chromatography to give a colorless oil (31.3 mg, 56% yield). <sup>1</sup>H NMR (600 MHz, CDCl<sub>3</sub>) δ 7.24 (d, *J* = 7.9 Hz, 2H), 7.11 (d, *J* = 7.9 Hz, 2H), 6.42 (d, *J* = 15.8 Hz, 1H), 6.04 – 6.09 (m, 1H), 2.34 – 2.38 (m, 4H), 2.33 (s, 3H), 1.80 – 1.85 (m, 2H). <sup>13</sup>C NMR (151 MHz, CDCl<sub>3</sub>) δ 137.2, 134.4, 131.9, 129.4, 126.6, 126.0, 119.8, 31.7, 25.1, 21.3, 16.5.



**(E)-6-(*m*-tolyl)hex-5-enitrile (3ca)**<sup>[4]</sup>:

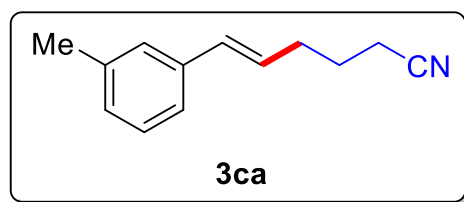

The title compound was prepared according to the general procedure and purified by column chromatography to give a colorless oil (26.0 mg, 47% yield). <sup>1</sup>H NMR (600 MHz, CDCl<sub>3</sub>) δ 7.14

– 7.21 (m, 3H), 7.04 (d, *J* = 7.4 Hz, 1H), 6.43 (d, *J* = 15.8 Hz, 1H), 6.09 – 6.14 (m, 1H), 2.35 – 2.39 (m, 4H), 2.34 (s, 3H), 1.81 – 1.86 (m, 2H). <sup>13</sup>C NMR (151 MHz, CDCl<sub>3</sub>) δ 138.2, 137.1, 132.2, 128.6, 128.2, 127.5, 126.9, 123.3, 119.7, 31.8, 25.1, 21.5, 16.5.

**(E)-6-(*o*-tolyl)hex-5-enitrile (3da)**<sup>[4]</sup>:

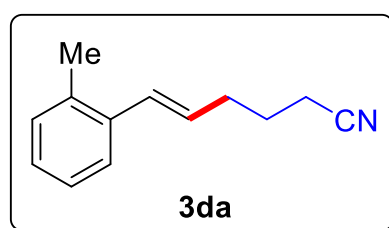

The title compound was prepared according to the general procedure and purified by column chromatography to give a colorless oil (31.0 mg, 56% yield). <sup>1</sup>H NMR (600 MHz, CDCl<sub>3</sub>) δ 7.39 – 7.41 (m,

1H), 7.12 – 7.17 (m, 3H), 6.66 (d, *J* = 15.7 Hz, 1H), 5.97 – 6.02 (m, 1H), 2.38 – 2.42 (m, 4H), 2.33 (s, 3H), 1.82 – 1.87 (m, 2H). <sup>13</sup>C NMR (151 MHz, CDCl<sub>3</sub>) δ 136.3, 135.2, 130.4, 130.0, 129.1, 127.4, 126.2, 125.5, 119.7, 32.0, 25.1, 19.9, 16.5.

**(E)-6-(4-methoxyphenyl)hex-5-enitrile (3ea)**<sup>[5]</sup>:

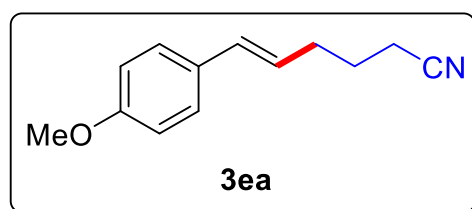

The title compound was prepared according to the general procedure and purified by column chromatography to give a colorless oil (34.0 mg, 56% yield). <sup>1</sup>H NMR (600 MHz, CDCl<sub>3</sub>)

δ 7.28 (d, *J* = 8.7 Hz, 2H), 6.84 (d, *J* = 8.8 Hz, 2H), 6.39 (d, *J* = 15.8 Hz, 1H), 5.95 – 6.00 (m, 1H), 3.79 (s, 3H), 2.32 – 2.38 (m, 4H), 1.79 – 1.84 (m, 2H). <sup>13</sup>C NMR (151 MHz, CDCl<sub>3</sub>) δ 159.0, 131.4, 129.9, 127.3, 125.4, 119.8, 114.0, 55.4, 31.7, 25.2, 16.5.

**(E)-6-(4-fluorophenyl)hex-5-enitrile (3fa)**<sup>[4]</sup>:

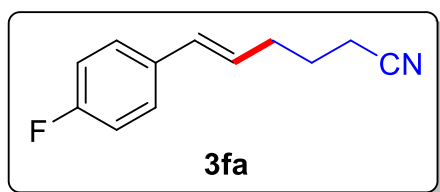

The title compound was prepared according to the general procedure and purified by column chromatography to give a colorless oil (33.6 mg, 59% yield). <sup>1</sup>H NMR (600 MHz, CDCl<sub>3</sub>) δ 7.29

– 7.31 (m, 2H), 6.98 – 7.01 (m, 2H), 6.42 (d, *J* = 15.8 Hz, 1H), 6.02 – 6.07 (m, 1H), 2.35 – 2.40 (m, 4H), 1.81 – 1.86 (m, 2H). <sup>13</sup>C NMR (151 MHz, CDCl<sub>3</sub>) δ 162.2 (d, *J* = 246.3 Hz), 133.3 (d, *J* = 3.3 Hz), 130.9, 127.6 (d, *J* = 8.0 Hz), 127.4 (d, *J* = 2.2 Hz), 119.7, 115.5 (d, *J* = 21.5 Hz), 31.7, 25.0, 16.5.

**(E)-6-(4-chlorophenyl)hex-5-enitrile (3ga)**<sup>[4]</sup>:

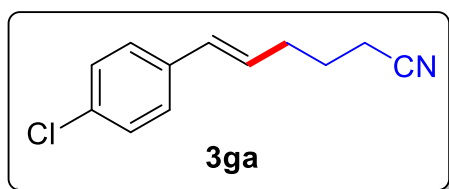

The title compound was prepared according to the general procedure and purified by column chromatography to give a colorless oil (21.3 mg, 35% yield). <sup>1</sup>H NMR (600 MHz, CDCl<sub>3</sub>) δ 7.27

(s, 4H), 6.40 – 6.43 (m, 1H), 6.09 – 6.14 (m, 1H), 2.36 – 2.40 (m, 4H), 1.82 – 1.87 (m, 2H). <sup>13</sup>C NMR (151 MHz, CDCl<sub>3</sub>) δ 135.6, 133.0, 130.9, 128.8, 128.4, 127.4, 119.6, 31.8, 25.0, 16.6.

**(E)-6-(3-chlorophenyl)hex-5-enitrile (3ha)**<sup>[6]</sup>:

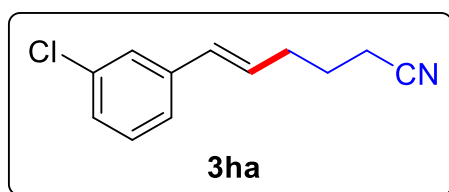

The title compound was prepared according to the general procedure and purified by column chromatography to give a colorless oil (24.6 mg, 40% yield). <sup>1</sup>H NMR (600 MHz, CDCl<sub>3</sub>) δ 7.33

(t, *J* = 1.6 Hz, 1H), 7.18 – 7.25 (m, 3H), 6.40 (d, *J* = 15.8 Hz, 1H), 6.12 – 6.17 (m, 1H), 2.37 – 2.41 (m, 4H), 1.82 – 1.87 (m, 2H). <sup>13</sup>C NMR (151 MHz, CDCl<sub>3</sub>) δ 139.0, 134.6, 130.8, 129.9, 129.4, 127.4, 126.0, 124.5, 119.6, 31.7, 24.9, 16.6.

**(E)-6-(2-chlorophenyl)hex-5-enitrile (3ia)**<sup>[6]</sup>:

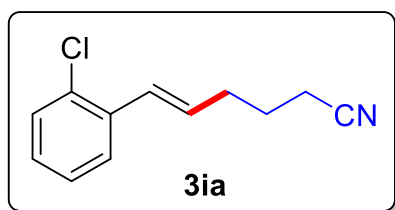

The title compound was prepared according to the general procedure and purified by column chromatography to give a colorless oil (35.7 mg, 58% yield). <sup>1</sup>H NMR (600 MHz, CDCl<sub>3</sub>) δ 7.49 (dd, *J* = 7.7, 1.6 Hz, 1H), 7.34 (dd, *J* = 7.9, 1.2 Hz, 1H), 7.15 – 7.22 (m, 2H), 6.83 (d, *J* = 15.8 Hz, 1H), 6.09 – 6.14 (m, 1H), 2.40 – 2.44 (m, 4H), 1.84 – 1.89 (m, 2H). <sup>13</sup>C NMR (151 MHz, CDCl<sub>3</sub>) δ 135.3, 132.7, 130.7, 129.7, 128.5, 128.3, 126.9, 126.8, 119.6, 31.9, 24.9, 16.6.

**(E)-6-(4-bromophenyl)hex-5-enitrile (3ja)**<sup>[3]</sup>:

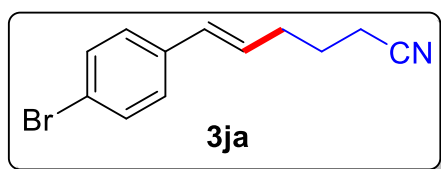

The title compound was prepared according to the general procedure and purified by column chromatography to give a white solid (46.1 mg, 61% yield). <sup>1</sup>H NMR (600 MHz, CDCl<sub>3</sub>) δ 7.42 (d, *J* = 8.5 Hz, 2H), 7.20 (d, *J* = 8.4 Hz, 2H), 6.39 (d, *J* = 15.8 Hz, 1H), 6.10 – 6.15 (m, 1H), 2.35 – 2.39 (m, 4H), 1.81 – 1.86 (m, 2H). <sup>13</sup>C NMR (151 MHz, CDCl<sub>3</sub>) δ 136.1, 131.7, 130.9, 128.6, 127.7, 121.1, 119.6, 31.7, 24.9, 16.6.

**methyl (E)-4-(5-cyanopent-1-en-1-yl)benzoate (3ka)**<sup>[7]</sup>:

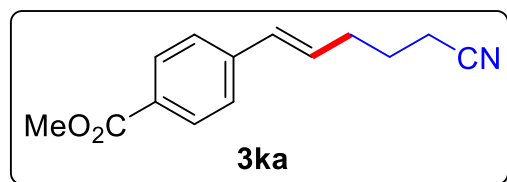

The title compound was prepared according to the general procedure and purified by column chromatography to give a white solid (50.0 mg, 73% yield). <sup>1</sup>H NMR (500 MHz, CDCl<sub>3</sub>) δ 7.97 (d, *J* = 8.4 Hz, 2H), 7.40 (d, *J* = 8.3 Hz, 2H), 6.50 (d, *J* = 15.9 Hz, 1H), 6.24 – 6.30 (m, 1H), 3.91 (s, 3H), 2.39 – 2.44 (m, 4H), 1.84 – 1.89 (m, 2H). <sup>13</sup>C NMR (126 MHz, CDCl<sub>3</sub>) δ 167.0, 141.7, 131.3, 130.6, 130.1, 129.0, 126.1, 119.5, 52.1, 31.8, 24.9, 16.6.

**(E)-6-(4-(methylsulfonyl)phenyl)hex-5-enitrile (3la):**

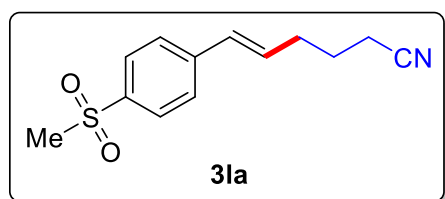

The title compound was prepared according to the general procedure and purified by column chromatography to give a yellow oil (43.2 mg, 58% yield). <sup>1</sup>H NMR (500 MHz, CDCl<sub>3</sub>) δ 7.87 (d, *J* = 8.4 Hz, 2H), 7.52 (d, *J* = 8.4 Hz, 2H), 6.53 (d, *J* = 15.9 Hz, 1H), 6.31 – 6.37 (m, 1H), 3.05 (s, 3H), 2.40 – 2.47 (m, 4H), 1.85 – 1.91 (m, 2H). <sup>13</sup>C NMR (126 MHz, CDCl<sub>3</sub>) δ 142.6, 138.9, 132.3, 130.4, 127.8, 126.8, 119.4, 44.6, 31.8, 24.7, 16.6. IR (KBr) ν<sub>max</sub> 3022, 3009, 2852, 2336, 2328, 1680, 1658, 1613, 1555, 1537, 1441, 1406, 1186, 1089, 1014, 867, 829, 673, 536 cm<sup>-1</sup>. HRMS(ESI): mass found: 250.0896, calculated mass for C<sub>13</sub>H<sub>16</sub>NO<sub>2</sub>S<sup>+</sup> [M+H]<sup>+</sup>: 250.0896.

**(E)-6-(naphthalen-1-yl)hex-5-enitrile (3ma)<sup>[8]</sup>:**

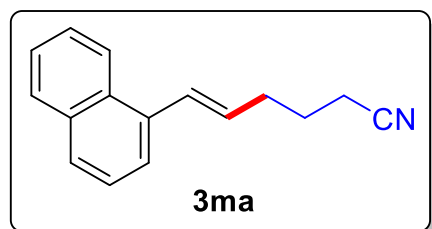

The title compound was prepared according to the general procedure and purified by column chromatography to give a colorless oil (32.3 mg, 49% yield). <sup>1</sup>H NMR (500 MHz, CDCl<sub>3</sub>) δ 8.09 (d, *J* = 8.3 Hz, 1H), 7.81 – 7.86 (m, 1H), 7.76 (d, *J* = 8.2 Hz, 1H), 7.40 – 7.56 (m, 4H), 7.20 (d, *J* = 15.5 Hz, 1H), 6.09 – 6.15 (m, 1H), 2.46 – 2.51 (m, 2H), 2.41 (t, *J* = 7.1 Hz, 2H), 1.86 – 1.91 (m, 2H). <sup>13</sup>C NMR (126 MHz, CDCl<sub>3</sub>) δ 135.0, 133.7, 131.2, 131.0, 129.4, 128.6, 127.8, 126.1, 125.9, 125.7, 123.8, 123.8, 119.6, 32.1, 25.1, 16.6.

**(E)-6-(naphthalen-2-yl)hex-5-enitrile (3na)<sup>[3]</sup>:**

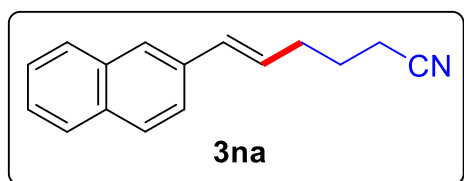

The title compound was prepared according to the general procedure and purified by column chromatography to give a colorless oil (30.8 mg, 46% yield). <sup>1</sup>H NMR (600 MHz, CDCl<sub>3</sub>) δ 7.77 (t, *J* = 9.4 Hz, 3H), 7.67 (s, 1H), 7.55 (dd, *J* = 8.5, 1.5 Hz, 1H), 7.41 – 7.46 (m, 2H),

6.59 (d,  $J = 15.8$  Hz, 1H), 6.20 – 6.25 (m, 1H), 2.35 – 2.41 (m, 4H), 1.80 – 1.85 (m, 2H).  $^{13}\text{C}$  NMR (151 MHz,  $\text{CDCl}_3$ )  $\delta$  134.6, 133.6, 132.9, 132.1, 128.3, 128.1, 128.0, 127.7, 126.4, 125.9, 125.8, 123.4, 119.7, 31.8, 25.0, 16.5.

**(*E*)-6-(furan-2-yl)hex-5-enitrile (3oa)**<sup>[4]</sup>:

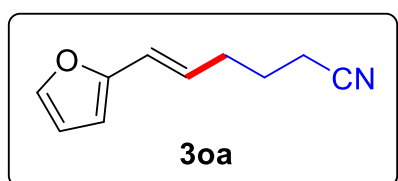

The title compound was prepared according to the general procedure and purified by column chromatography to give a colorless oil (27.3 mg, 56% yield).  $^1\text{H}$  NMR (600 MHz,  $\text{CDCl}_3$ )  $\delta$  7.33 (s, 1H), 6.36 (dd,  $J = 2.9, 1.9$  Hz, 1H), 6.28 (d,  $J = 15.8$  Hz, 1H), 6.18 (d,  $J = 3.1$  Hz, 1H), 6.04 – 6.09 (m, 1H), 2.35 – 2.40 (m, 4H), 1.81 – 1.86 (m, 2H).  $^{13}\text{C}$  NMR (151 MHz,  $\text{CDCl}_3$ )  $\delta$  152.6, 141.8, 126.5, 120.7, 119.7, 111.4, 107.2, 31.5, 25.0, 16.5.

**(*E*)-3,6-diphenylhex-5-enitrile (3ab)**<sup>[4]</sup>:

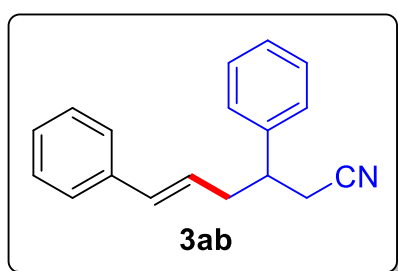

The title compound was prepared according to the general procedure and purified by column chromatography to give a colorless oil (43.3 mg, 58% yield).  $^1\text{H}$  NMR (600 MHz,  $\text{CDCl}_3$ )  $\delta$  7.36 (t,  $J = 7.5$  Hz, 2H), 7.28 – 7.29 (m, 4H), 7.20 – 7.25 (m, 4H), 6.47 (d,  $J = 15.8$  Hz, 1H), 6.00 – 6.05 (m, 1H), 3.08 – 3.13 (m, 1H), 2.60 – 2.69 (m, 4H).  $^{13}\text{C}$  NMR (151 MHz,  $\text{CDCl}_3$ )  $\delta$  141.3, 137.0, 133.2, 129.0, 128.6, 127.6, 127.5, 127.2, 126.2, 126.2, 118.6, 42.1, 38.5, 24.0.

**(*E*)-6-phenyl-3-(*p*-tolyl)hex-5-enitrile (3ac)**:

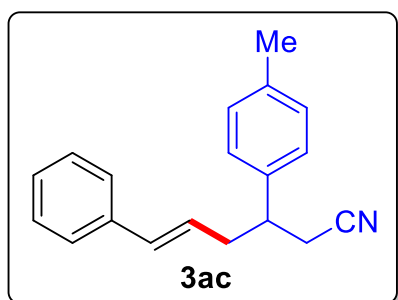

The title compound was prepared according to the general procedure and purified by column chromatography to give a colorless oil (41.4 mg, 53% yield).  $^1\text{H}$  NMR (600 MHz,  $\text{CDCl}_3$ )  $\delta$  7.26 – 7.29 (m, 4H), 7.19 – 7.21 (m, 1H), 7.15 (dd,  $J = 16.8, 7.9$  Hz, 4H), 6.46 (d,  $J = 15.8$  Hz, 1H), 6.00 – 6.05 (m, 1H),

3.04 – 3.09 (m, 1H), 2.57 – 2.67 (m, 4H), 2.33 (s, 3H).  $^{13}\text{C}$  NMR (151 MHz,  $\text{CDCl}_3$ )  $\delta$  138.3, 137.2, 137.1, 133.1, 129.7, 128.6, 127.5, 127.1, 126.4, 126.2, 118.7, 41.8, 38.6, 24.1, 21.2. IR (KBr)  $\nu_{\text{max}}$  3054, 3025, 2854, 2350, 2336, 1694, 1660, 1594, 1555, 1494, 1423, 1373, 1244, 1116, 1090, 1045, 916, 814, 693, 535  $\text{cm}^{-1}$ . HRMS(ESI): mass found: 262.1592, calculated mass for  $\text{C}_{19}\text{H}_{20}\text{N}^+$   $[\text{M}+\text{H}]^+$  : 262.1590.

**(E)-3-(4-chlorophenyl)-6-phenylhex-5-enenitrile (3ad)**<sup>[4]</sup>:

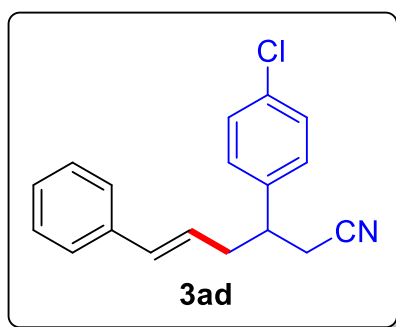

The title compound was prepared according to the general procedure and purified by column chromatography to give a colorless oil (40.0 mg, 47% yield).  $^1\text{H}$  NMR (600 MHz,  $\text{CDCl}_3$ )  $\delta$  7.34 (d,  $J$  = 8.4 Hz, 2H), 7.29 – 7.31 (m, 4H), 7.19 – 7.24 (m, 3H), 6.47 (d,  $J$  = 15.8 Hz, 1H), 5.98 – 6.03 (m, 1H), 3.09

– 3.13 (m, 1H), 2.61 – 2.70 (m, 4H).  $^{13}\text{C}$  NMR (151 MHz,  $\text{CDCl}_3$ )  $\delta$  139.8, 136.9, 133.6, 133.5, 129.2, 128.7, 128.7, 127.7, 126.3, 125.7, 118.3, 41.7, 38.4, 24.0.

**(E)-3-(naphthalen-2-yl)-6-phenylhex-5-enenitrile (3ae)**<sup>[3]</sup>:

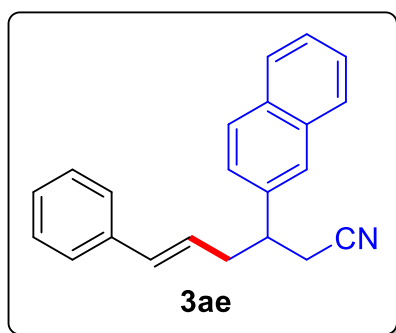

The title compound was prepared according to the general procedure and purified by column chromatography to give a colorless oil (42.3 mg, 47% yield).  $^1\text{H}$  NMR (600 MHz,  $\text{CDCl}_3$ )  $\delta$  7.82 – 7.86 (m, 3H), 7.70 (s, 1H), 7.46 – 7.51 (m, 2H), 7.38 (dd,  $J$  = 8.4, 1.2 Hz, 1H), 7.25 – 7.27 (m, 4H), 7.19 – 7.21 (m,

1H), 6.50 (d,  $J$  = 15.8 Hz, 1H), 6.03 – 6.08 (m, 1H), 3.26 – 3.30 (m, 1H), 2.70 – 2.79 (m, 4H).  $^{13}\text{C}$  NMR (151 MHz,  $\text{CDCl}_3$ )  $\delta$  138.7, 137.0, 133.6, 133.3, 132.9, 128.9, 128.7, 128.0, 127.8, 127.6, 126.5, 126.3, 126.2, 126.2, 126.1, 125.2, 118.6, 42.4, 38.6, 24.1. IR (KBr)  $\nu_{\text{max}}$  3054, 3024, 2849, 2340, 2320, 2176, 1696, 1661, 1614, 1505, 1445, 1434, 1417, 1373, 1270, 1244, 1124, 1017, 856, 818, 692, 460  $\text{cm}^{-1}$ . HRMS(ESI): mass found: 298.1590, calculated mass for  $\text{C}_{22}\text{H}_{20}\text{N}^+$   $[\text{M}+\text{H}]^+$  : 298.1590.

**(E)-3-methyl-3,6-diphenylhex-5-enitrile (3af)**<sup>[6]</sup>:

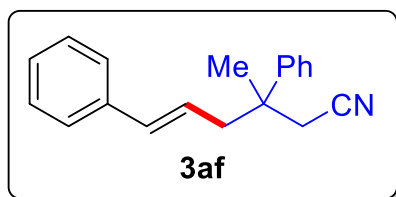

The title compound was prepared according to the general procedure and purified by column chromatography to give a colorless oil (26.7 mg, 34% yield). <sup>1</sup>H NMR (600 MHz, CDCl<sub>3</sub>) δ 7.35 – 7.40 (m, 4H), 7.28 – 7.30 (m, 1H), 7.24 - 7.25 (m, 4H), 7.19 – 7.21 (m, 1H), 6.45 – 6.48 (d, *J* = 15.8 Hz, 1H), 5.83 – 5.88 (m, 1H), 2.64 – 2.76 (m, 4H), 1.56 (s, 3H). <sup>13</sup>C NMR (151 MHz, CDCl<sub>3</sub>) δ 144.1, 137.1, 134.1, 128.9, 128.6, 127.6, 127.2, 126.3, 125.8, 124.8, 118.3, 45.2, 40.6, 30.3, 25.8.

**(E)-3-benzyl-6-phenylhex-5-enitrile (3ag)**<sup>[4]</sup>:

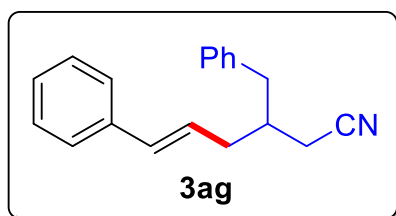

The title compound was prepared according to the general procedure and purified by column chromatography to give a colorless oil (45.7 mg, 58% yield). <sup>1</sup>H NMR (600 MHz, CDCl<sub>3</sub>) δ 7.35 – 7.37 (m, 2H), 7.30 – 7.34 (m, 4H), 7.23 – 7.26 (m, 3H), 7.20 (d, *J* = 7.2 Hz, 2H), 6.51 (d, *J* = 15.8 Hz, 1H), 6.12 – 6.17 (m, 1H), 2.85 – 2.88 (dd, *J* = 13.8, 6.1 Hz, 1H), 2.67 – 2.70 (dd, *J* = 13.8, 8.7 Hz, 1H), 2.43 – 2.47 (m, 1H), 2.32 – 2.37 (m, 2H), 2.26 (dd, *J* = 16.8, 5.6 Hz, 1H), 2.13 – 2.18 (m, 1H). <sup>13</sup>C NMR (151 MHz, CDCl<sub>3</sub>) δ 138.9, 137.1, 133.4, 129.2, 128.8, 128.7, 127.6, 126.8, 126.4, 126.2, 118.6, 39.8, 37.7, 36.9, 20.8.

**methyl (E)-2-(cyanomethyl)-5-phenylpent-4-enoate (3ah)**:

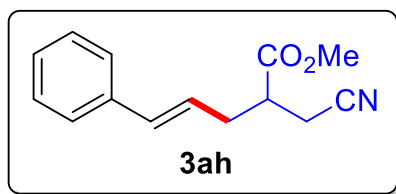

The title compound was prepared according to the general procedure and purified by column chromatography to give a colorless oil (37.1 mg, 54% yield). <sup>1</sup>H NMR (600 MHz, CDCl<sub>3</sub>) δ 7.30 – 7.35 (m, 4H), 7.23 – 7.24 (m, 1H), 6.52 (d, *J* = 15.7 Hz, 1H), 6.02 – 6.07 (m, 1H), 3.77 (s, 3H), 2.89 – 2.93 (m, 1H), 2.60 – 2.74 (m, 4H). <sup>13</sup>C NMR (151 MHz, CDCl<sub>3</sub>) δ 172.5, 136.6, 134.3, 128.7, 127.8, 126.3, 124.0, 117.9, 52.6, 41.4, 34.4, 18.6. IR (KBr)  $\nu_{\max}$  3026,

2953, 2851, 2343, 2187, 1688, 1598, 1543, 1493, 1438, 1373, 1236, 1199, 1038, 968, 744, 694  $\text{cm}^{-1}$  HRMS(ESI): mass found: 230.1174, calculated mass for  $\text{C}_{14}\text{H}_{16}\text{NO}_2^+$   $[\text{M}+\text{H}]^+$ : 230.1176.

***tert*-butyl cinnamyl(cyanomethyl)carbamate (**3ai**)<sup>[6]</sup>:**

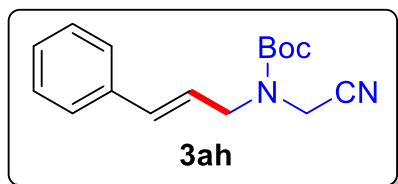

The title compound was prepared according to the general procedure and purified by column chromatography to give a yellow oil (17.3 mg, 21% yield).  $^1\text{H}$  NMR (600 MHz,  $\text{CDCl}_3$ )  $\delta$  7.38 – 7.40 (m, 2H), 7.34 (t,  $J = 7.5$  Hz, 2H), 7.27 – 7.29 (m, 1H), 6.57 (s, 1H), 6.09 – 6.14 (m, 1H), 4.13 – 4.22 (m, 4H), 1.52 (s, 9H).  $^{13}\text{C}$  NMR (151 MHz,  $\text{CDCl}_3$ )  $\delta$  136.1, 128.8, 128.2, 126.6, 123.2, 116.1, 82.1, 49.3, 34.4, 28.3.

**2-(cinnamyloxy)acetonitrile (**3aj**)<sup>[9]</sup>:**

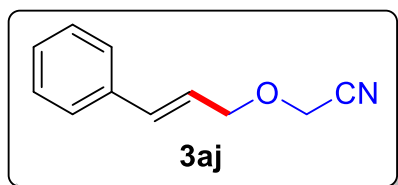

The title compound was prepared according to the general procedure and purified by column chromatography to give a colorless oil (13.0 mg, 25% yield).  $^1\text{H}$  NMR (600 MHz,  $\text{CDCl}_3$ )  $\delta$  7.40 – 7.42 (m, 2H), 7.34 (t,  $J = 7.5$  Hz, 2H), 7.27 – 7.30 (m, 1H), 6.70 (d,  $J = 15.9$  Hz, 1H), 6.21 – 6.25 (m, 1H), 4.29 - 4.31 (m, 4H).  $^{13}\text{C}$  NMR (151 MHz,  $\text{CDCl}_3$ )  $\delta$  136.0, 135.5, 128.8, 128.4, 126.8, 123.1, 116.1, 71.8, 54.8.

## 5. Radical test and gram-scale experiment

When TEMPO (2.0 equiv.) was introduced to the standard conditions, the TLC analysis and GC-MS analysis showed that it did not produce corresponding product at all. The residue was purified by flash column chromatography on silica gel and eluted with ethyl acetate/petroleum ether (1/100-1/50) to afford radical trapping product 4-((2,2,6,6-tetramethylpiperidin-1-yl)oxy)butanenitrile **4** (40.3 mg, 40% isolated yield, yield based on **2a**) as a yellowish oil. When BHT (2.0 equiv.) was introduced to the standard conditions, the desired product **3aa** was isolated in lower yield of 21% (10.8



mg). These results indicated that a radical path way might be involved in this novel reductive denitrative coupling reaction of nitroalkenes.

**4-((2,2,6,6-tetramethylpiperidin-1-yl)oxy)butanenitrile (4)**<sup>[10]</sup>: <sup>1</sup>H NMR (600 MHz, CDCl<sub>3</sub>) δ 3.84 (t, *J* = 5.8 Hz, 2H), 2.50 (t, *J* = 7.2 Hz, 2H), 1.87 – 1.91 (m, 2H), 1.52 – 1.57 (m, 1H), 1.44 – 1.48 (m, 4H), 1.31 – 1.33 (m, 1H), 1.15 (s, 6H), 1.09 (s, 6H). <sup>13</sup>C NMR (151 MHz, CDCl<sub>3</sub>) δ 119.8, 73.6, 59.9, 39.6, 33.2, 25.2, 20.1, 17.1, 14.5.

To demonstrate the synthetic versatility of the present catalytic system, the reaction of **1a** with **2a** on a 15 mmol scale was carried out under the standard reaction conditions, yielding 1.4 g of **3aa** in 54% yield.

a) Radical-trapping experiments

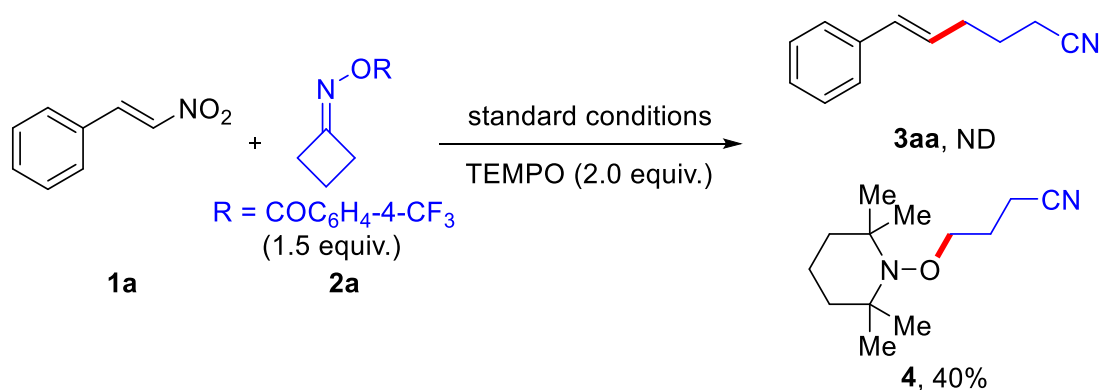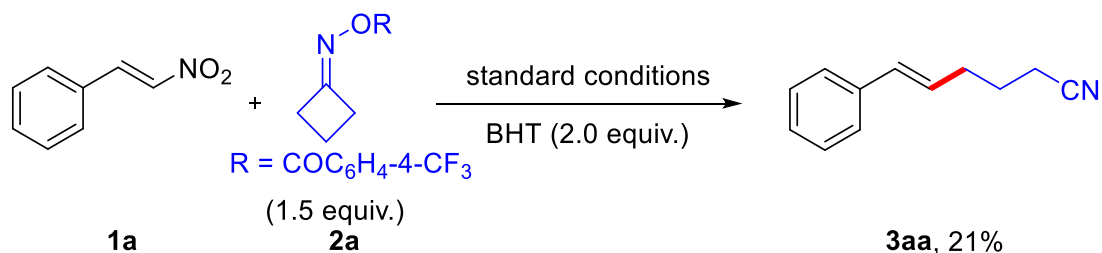

b) Gram-scale experiment

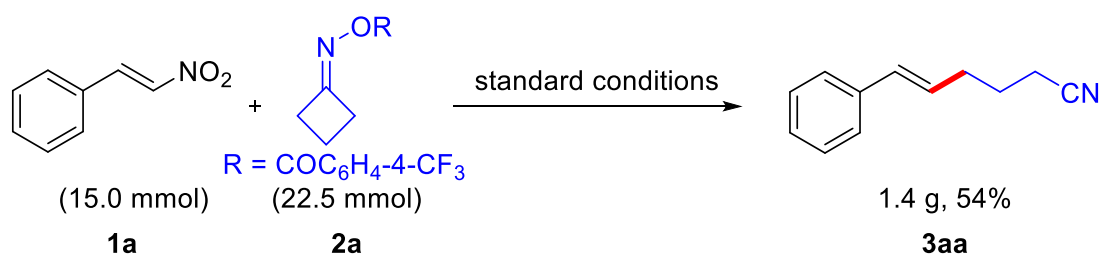

## 6. References

- [1] Vo, Q. V.; Trenerry, C.; Rochfort, S.; Wadeson, J.; Leyton, C.; Hughes, A. B. *Bioorgan. Med. Chem.* **2013**, *21*, 5945-5954.

- [2] Zhang, M. M.; Li, S. H.; Tu, J. L.; Mina, Q. Q.; Liu, F. *Org. Chem. Front.* **2020**, *7*, 622-627.
- [3] Zhao, B.; Shi, Z. *Angew. Chem. Int. Ed.* **2017**, *56*, 12727-12731.
- [4] Zhao, J. F.; Duan, X. H.; Gu, Y. R.; Gao, P.; Guo, L. N. *Org. Lett.* **2018**, *20*, 4614-4617.
- [5] Deyris, P.; Cañeque, T.; Wang, Y.; Retailleau, P.; Bigi, F.; Maggi, R.; Maestri, G.; Malacria, M. *ChemCatChem.* **2015**, *7*, 3266-3269.
- [6] Shen, X.; Zhao, J. J.; Yu, S. Y. *Org. Lett.* **2018**, *20*, 5523-5527.
- [7] Werner, E. W.; Sigman, M. S. *J. Am. Chem. Soc.* **2011**, *133*, 9692-9695.
- [8] Long, J.; Xia, S.; Wang, T.; Cheng, G.; Fang, X. *ACS Catal.* **2021**, *11*, 13880-13890.
- [9] Becker, M. R.; Richardson, A. D.; Schindler, C. S. *Nat. Commun.* **2019**, *10*, 5095-5103.
- [10] Yu, X. Y.; Chen, J. R.; Wang, P. Z.; Yang, M. N.; Liang, D.; Xiao, W. J. *Angew. Chem. Int. Ed.* **2018**, *57*, 738-743.

## 7. Copies for $^1\text{H}$ NMR, $^{13}\text{C}$ NMR spectra of the products

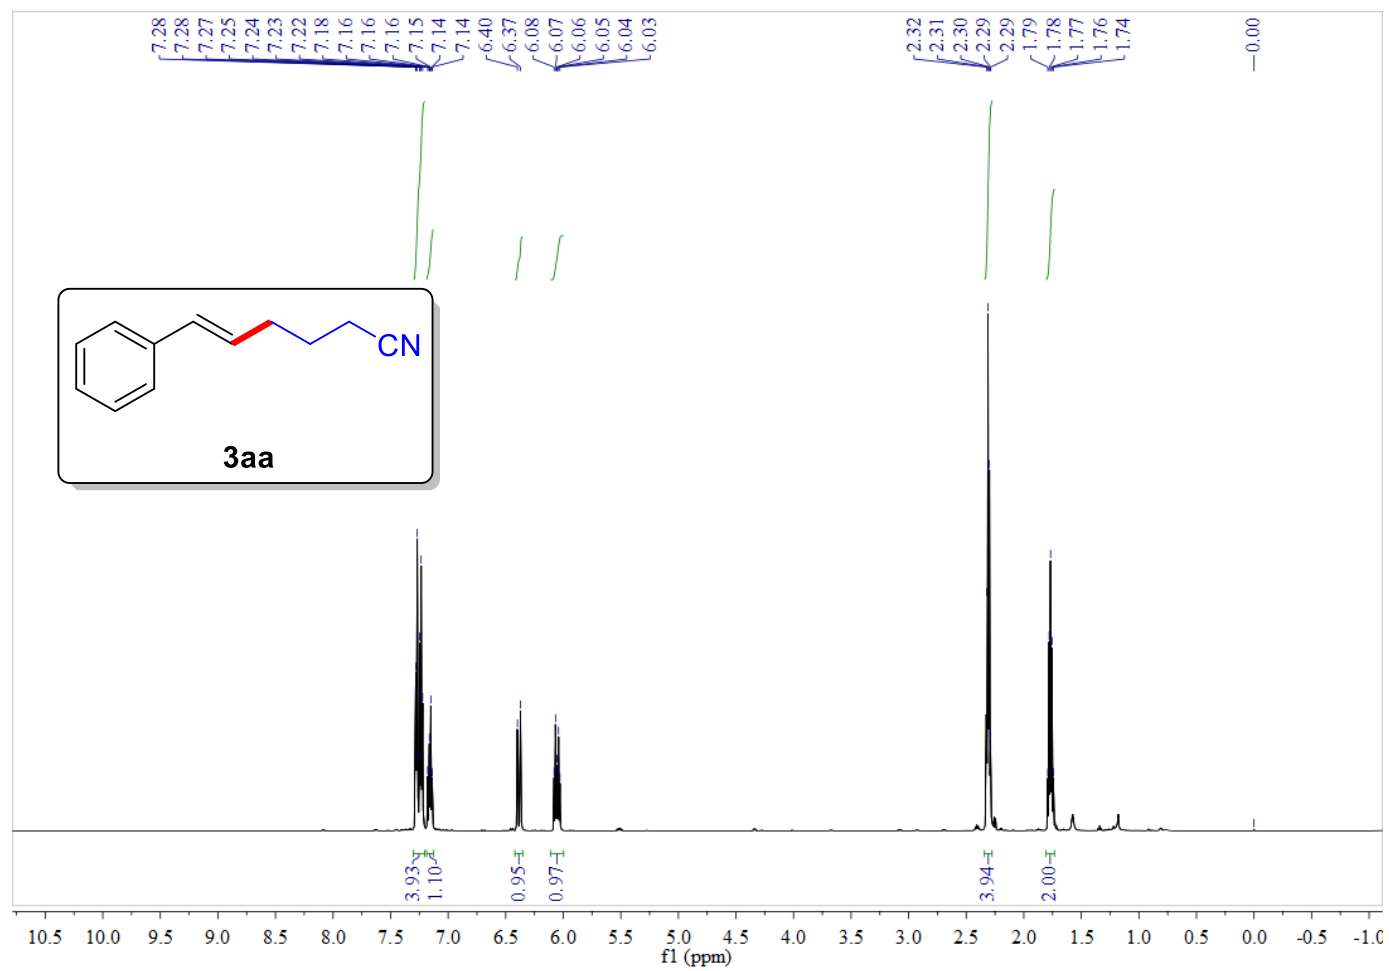

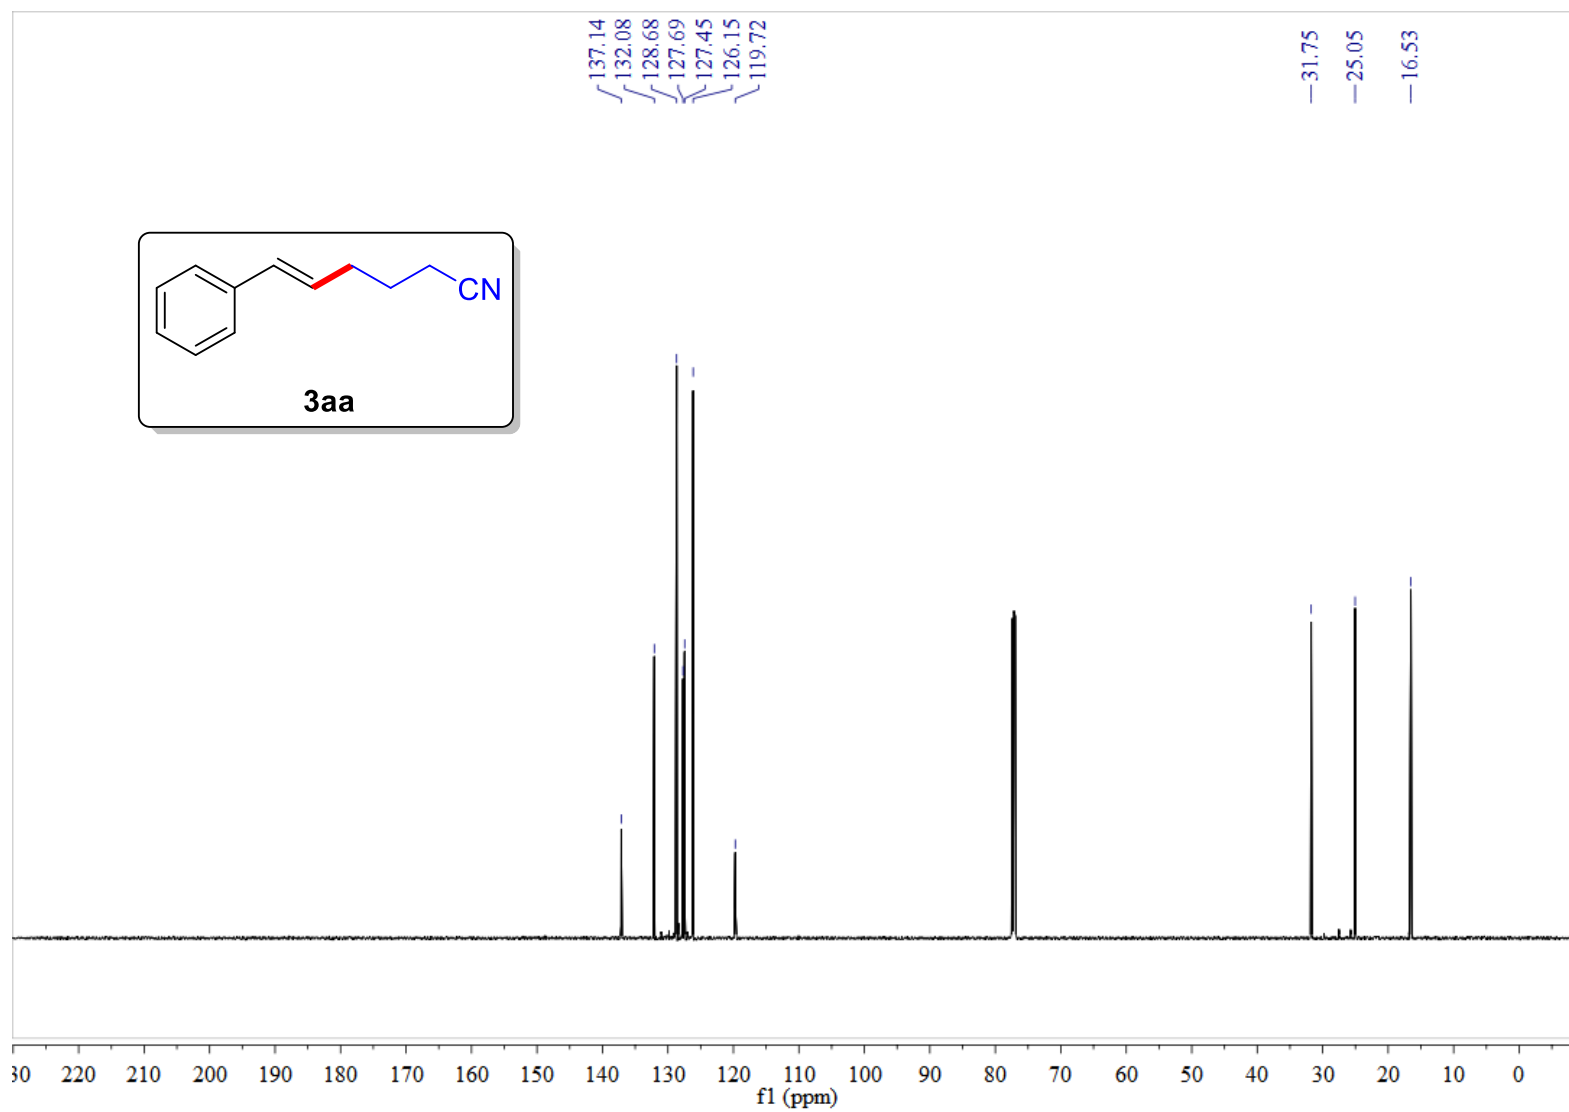

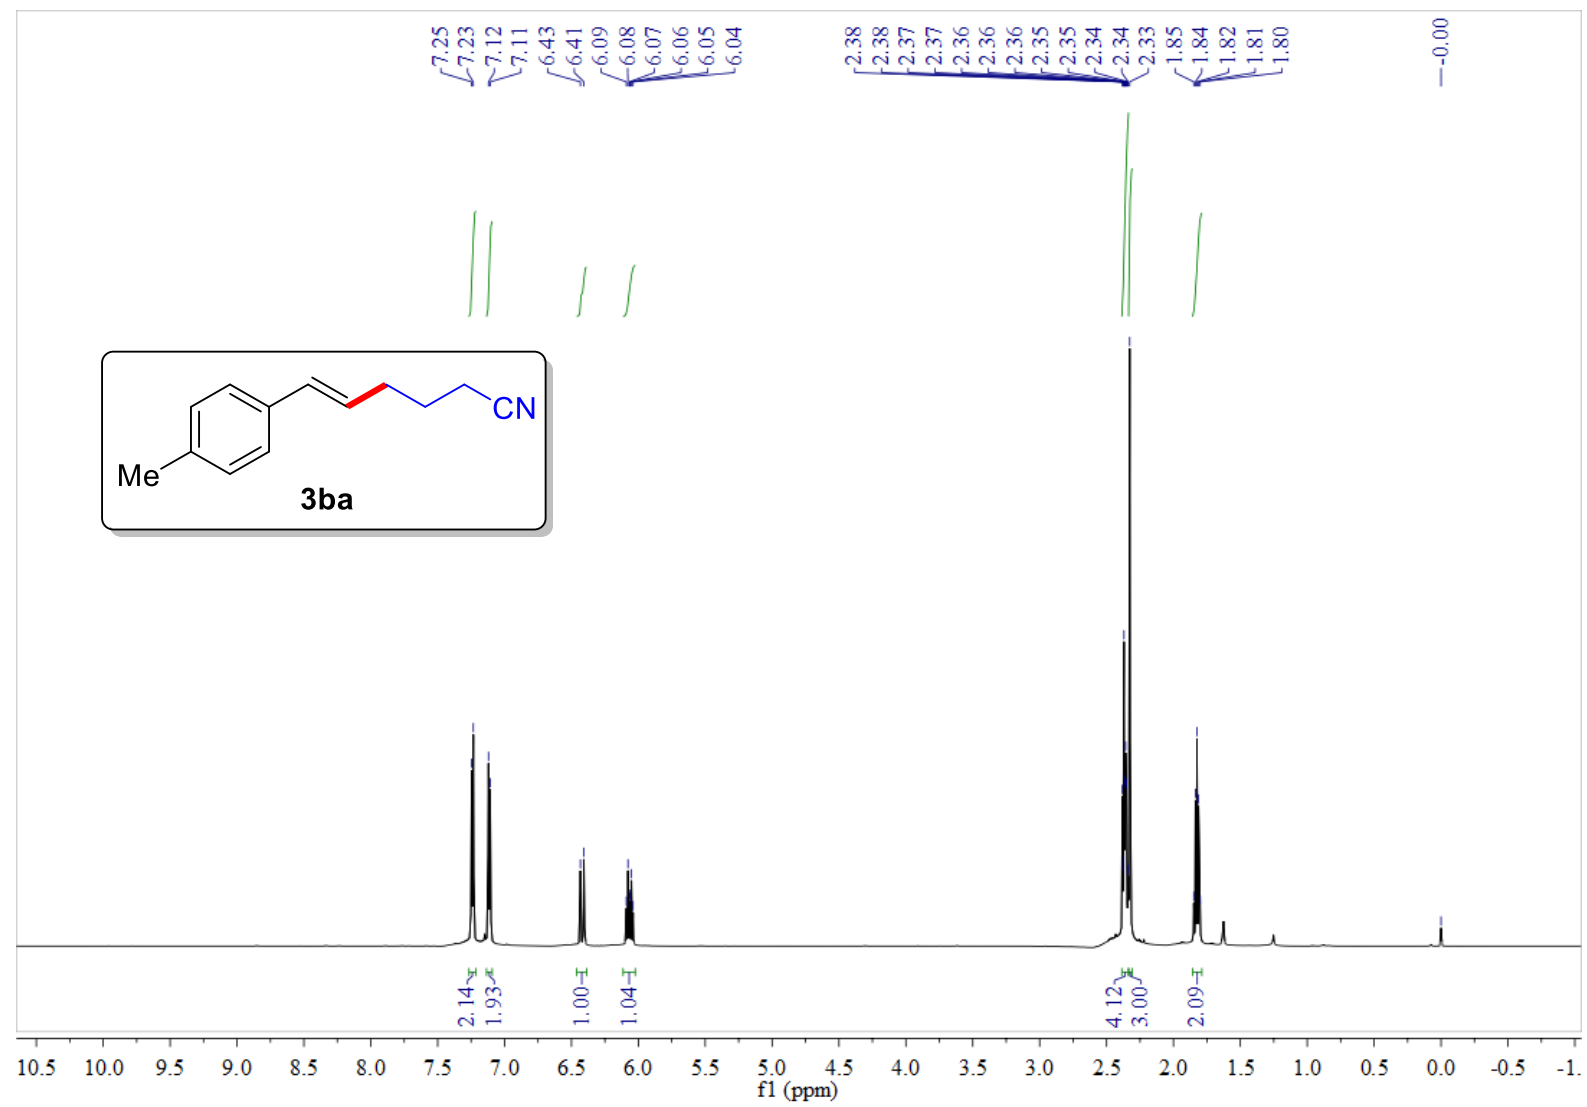

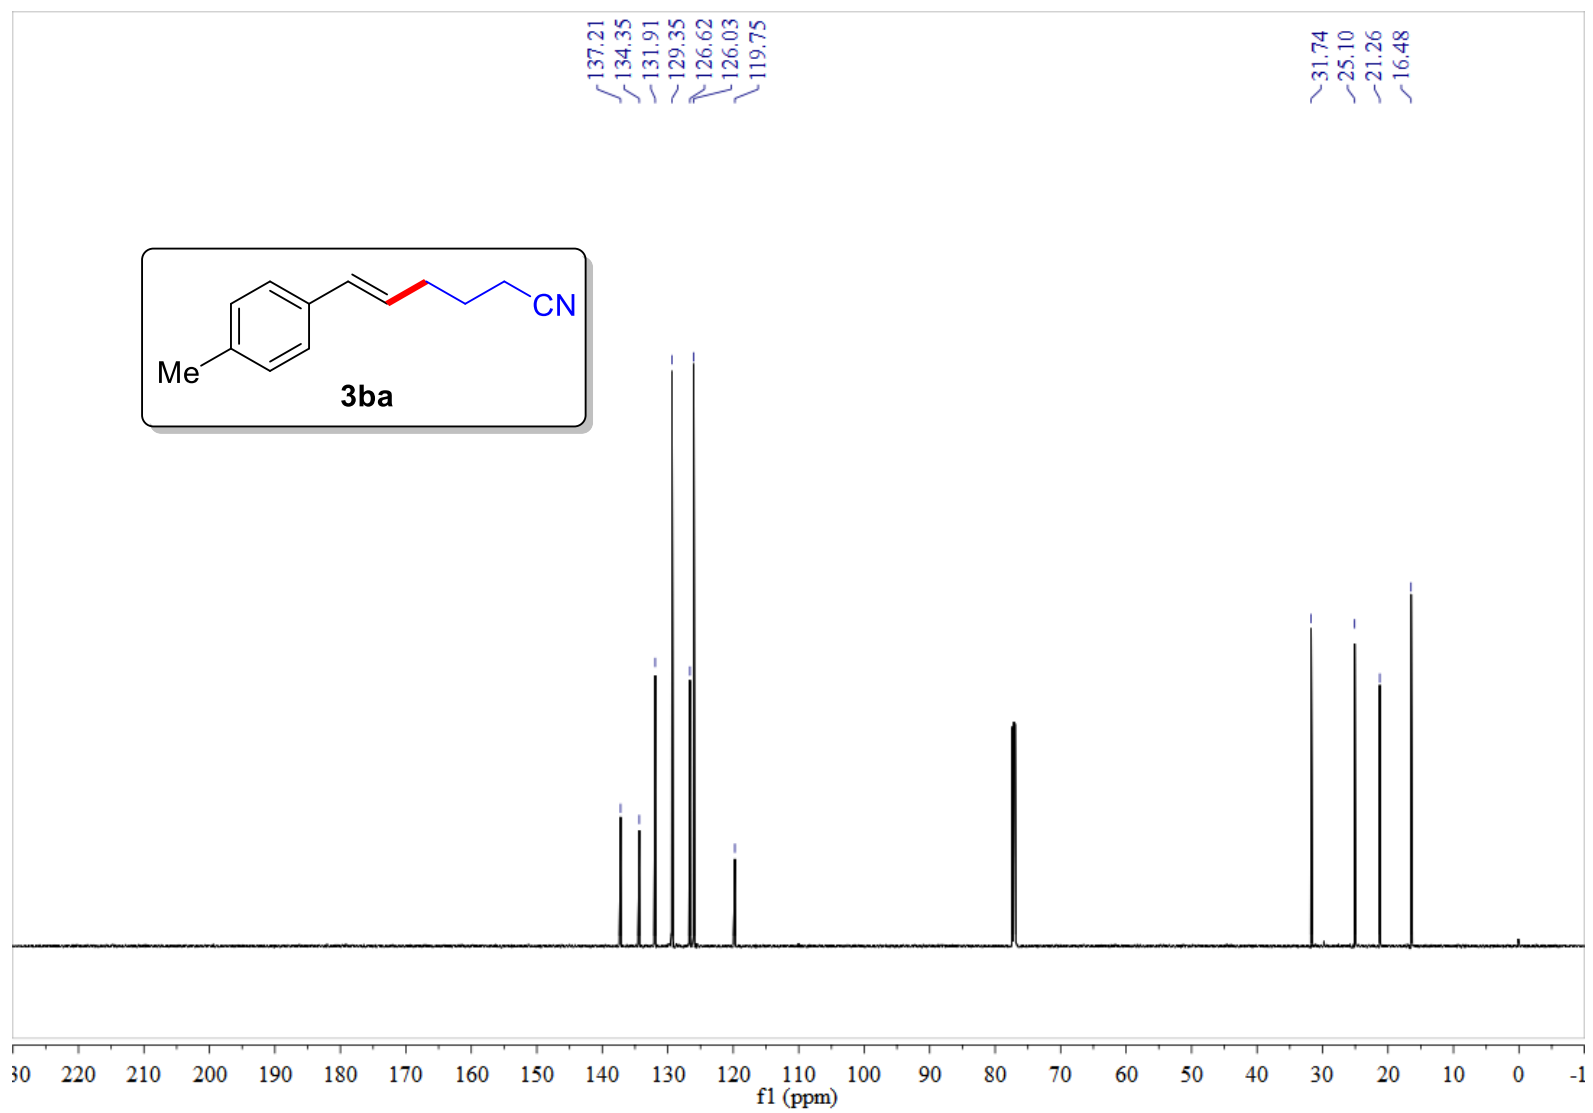

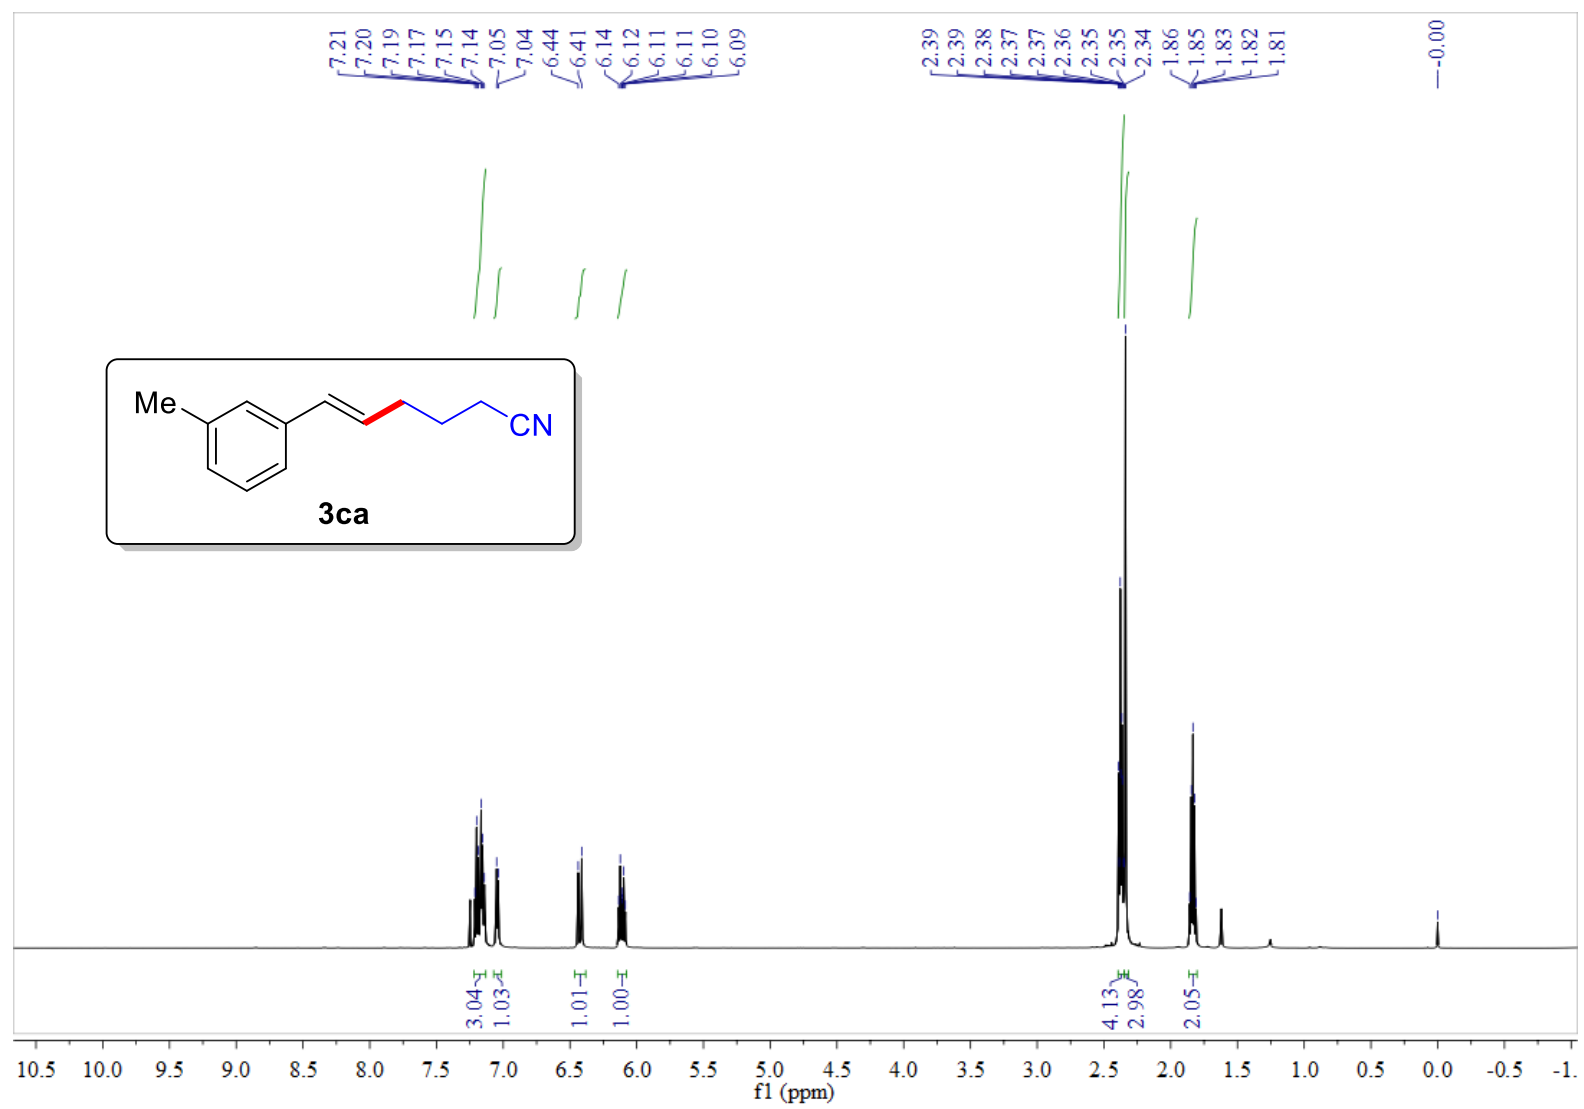

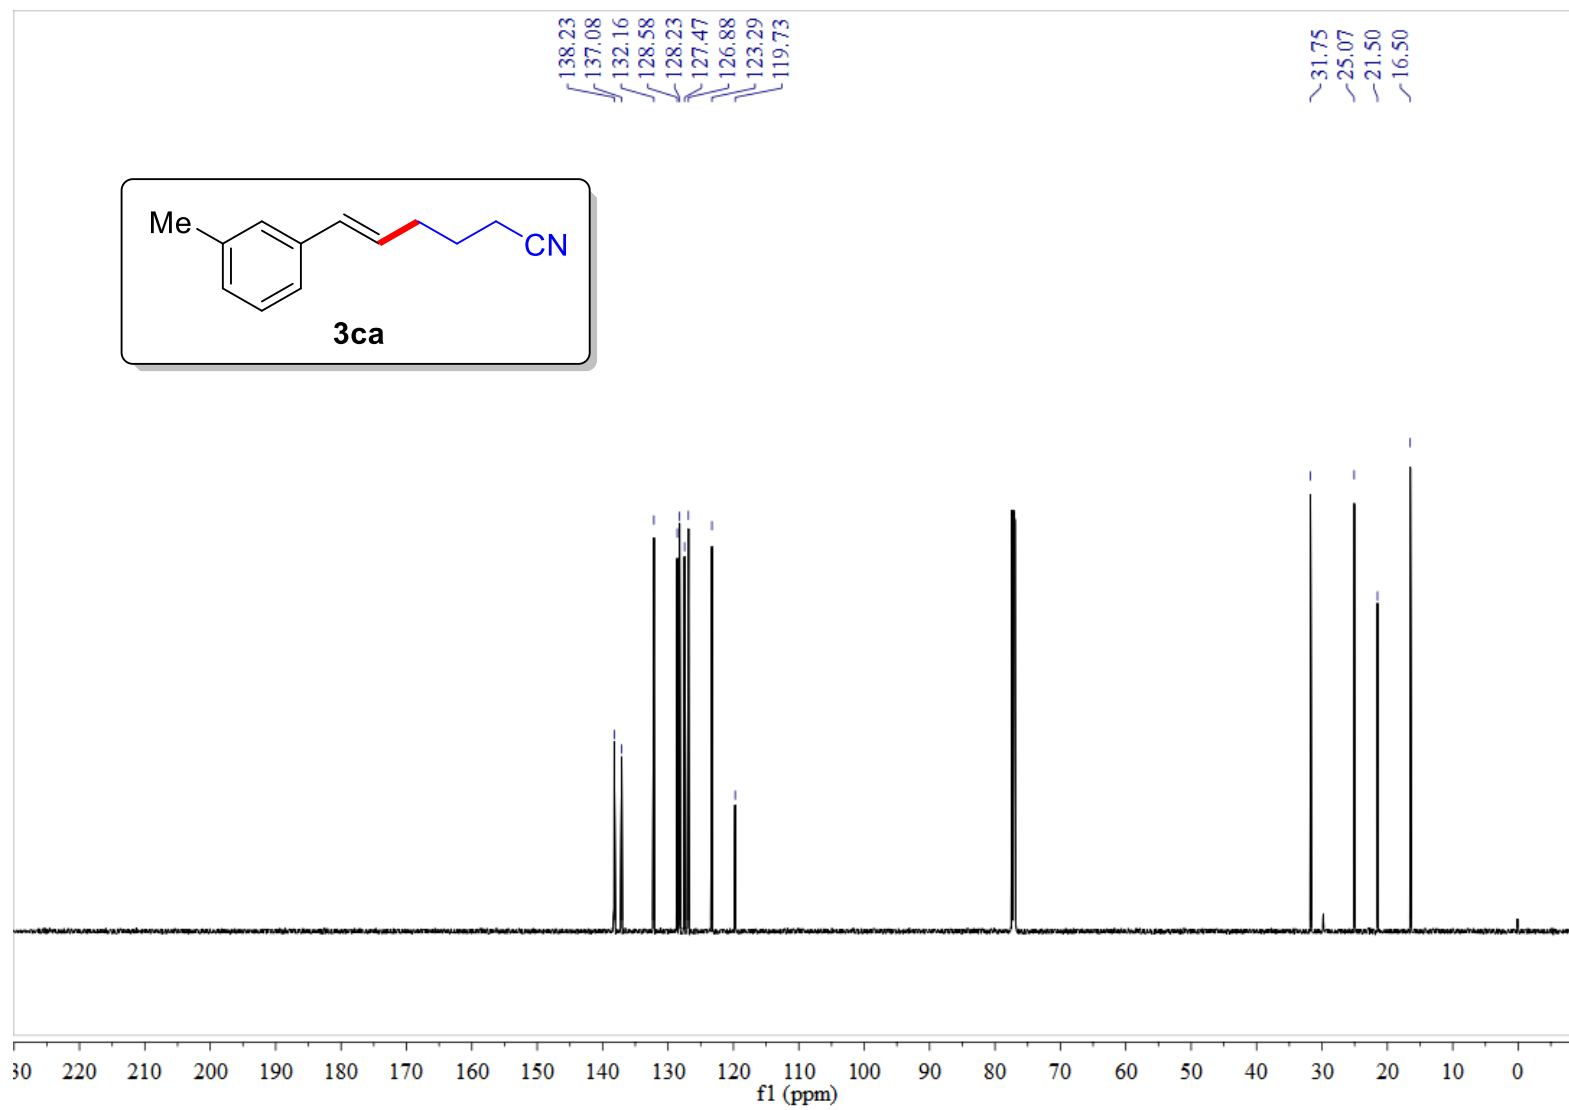



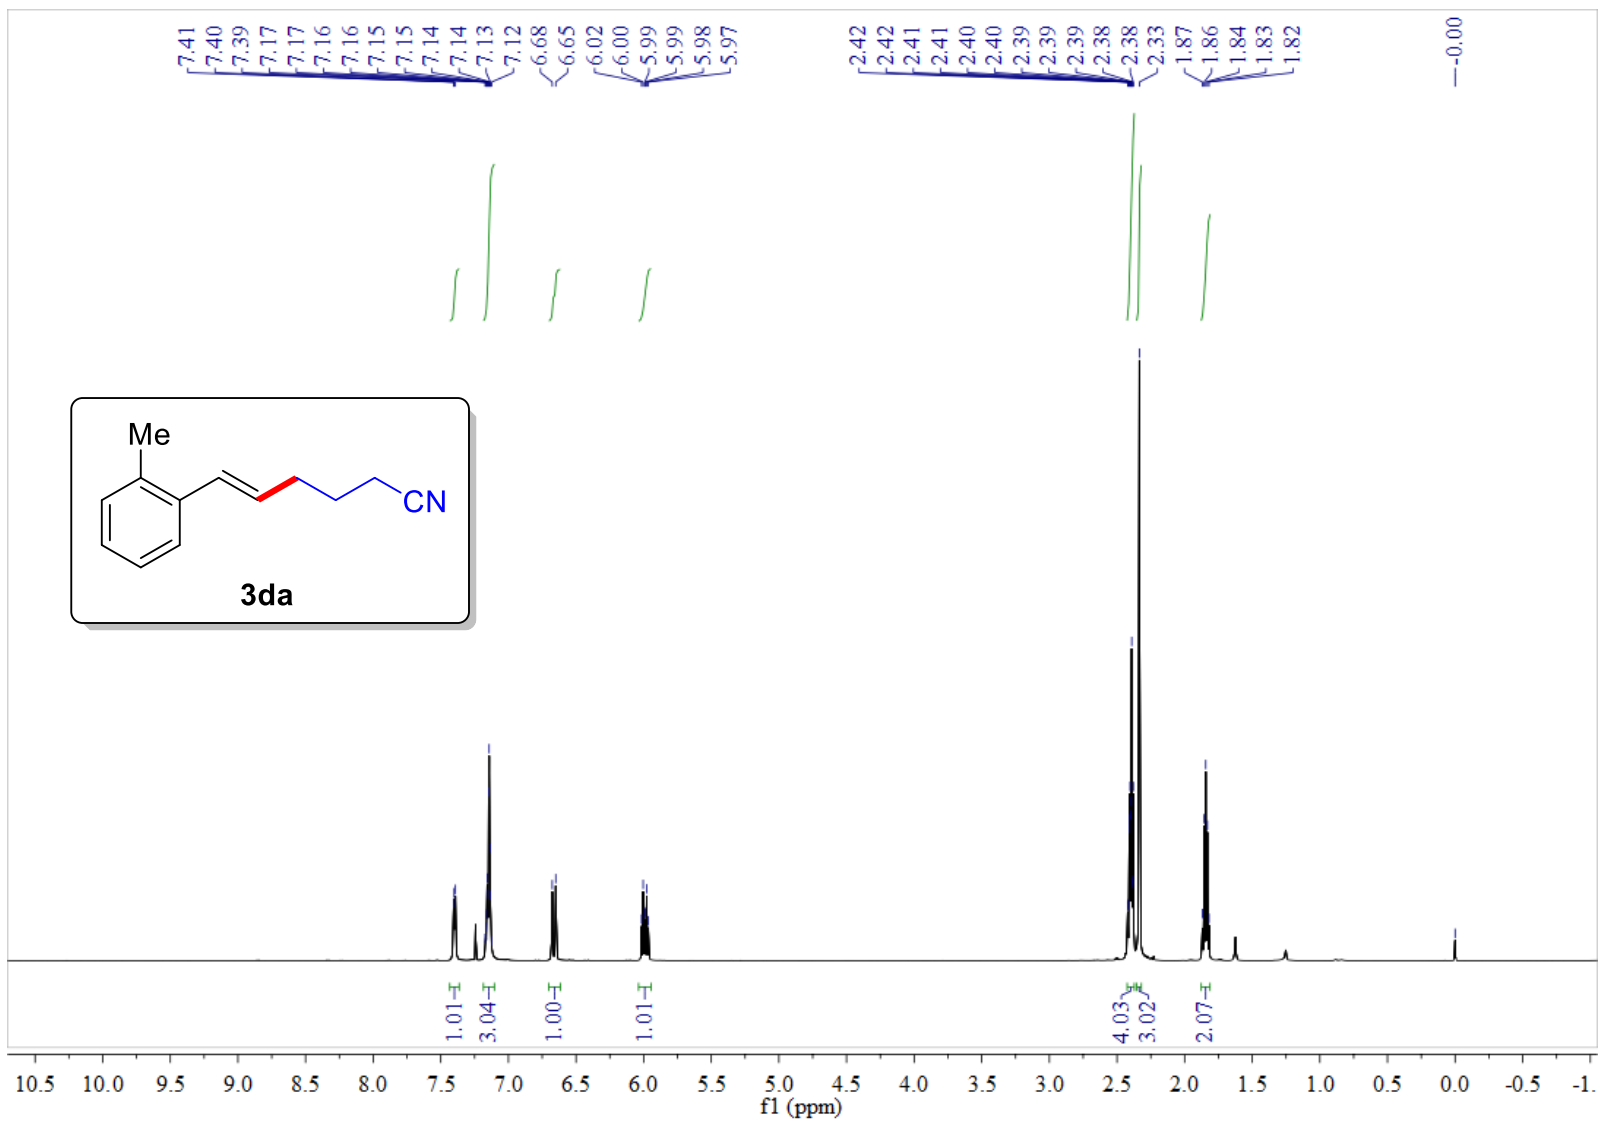

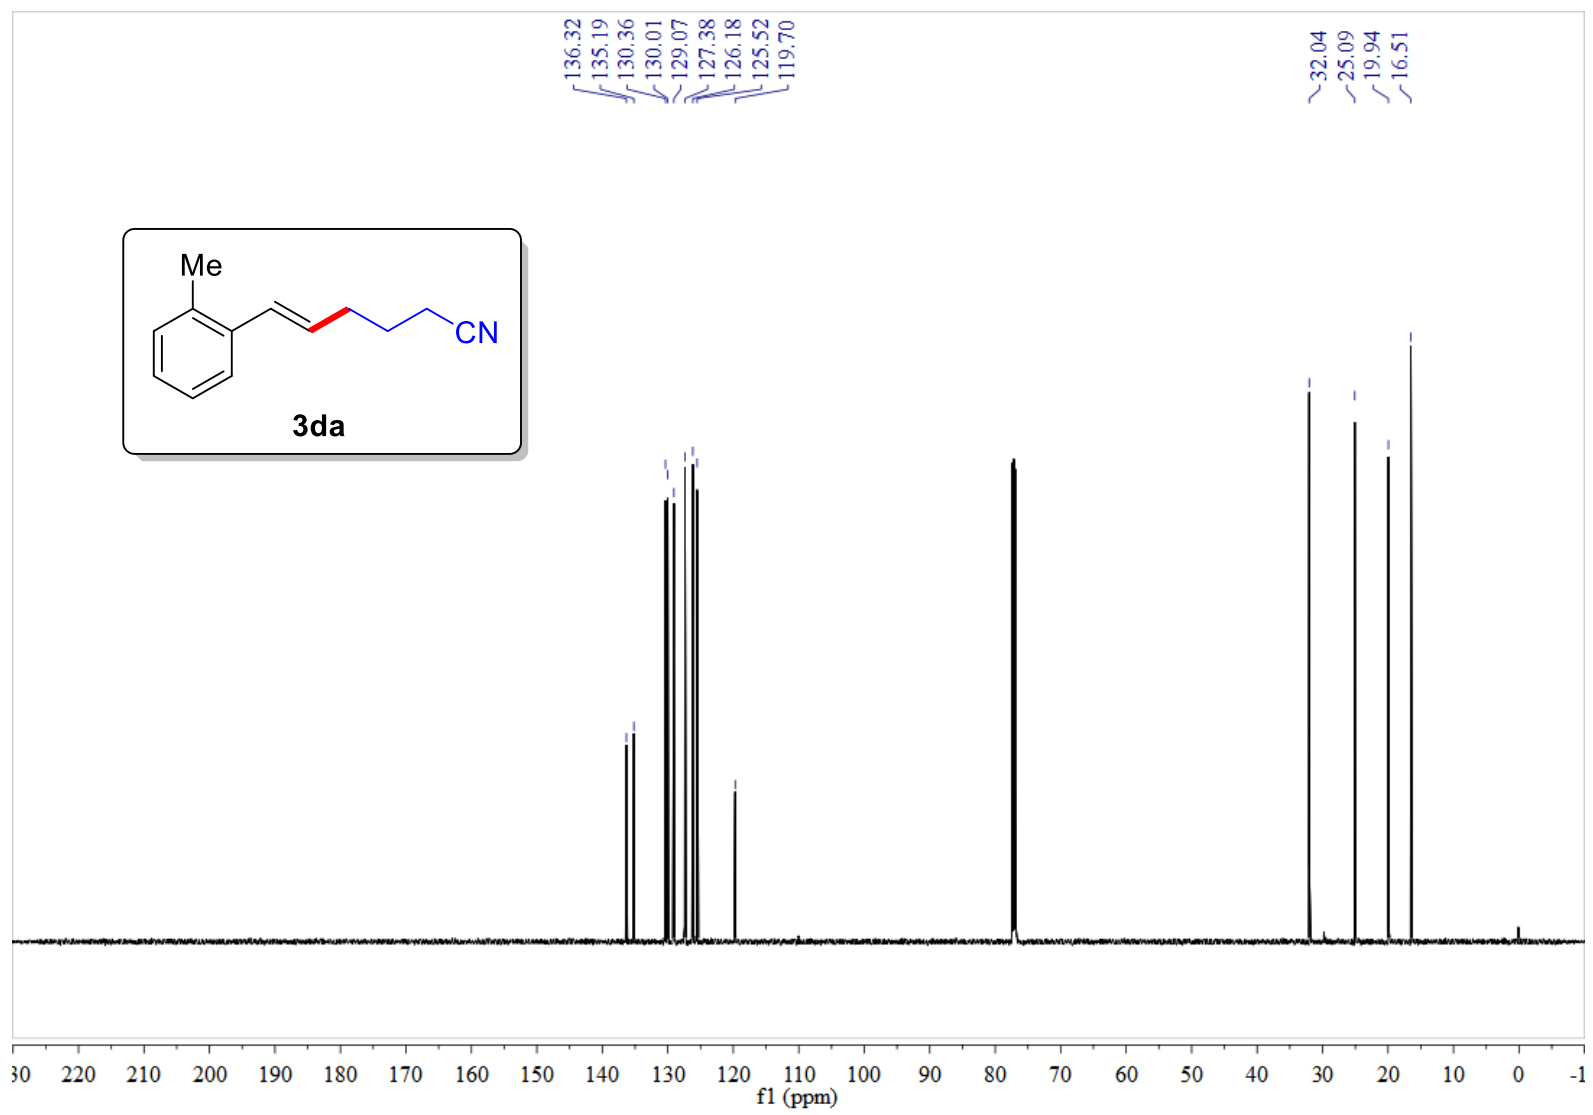

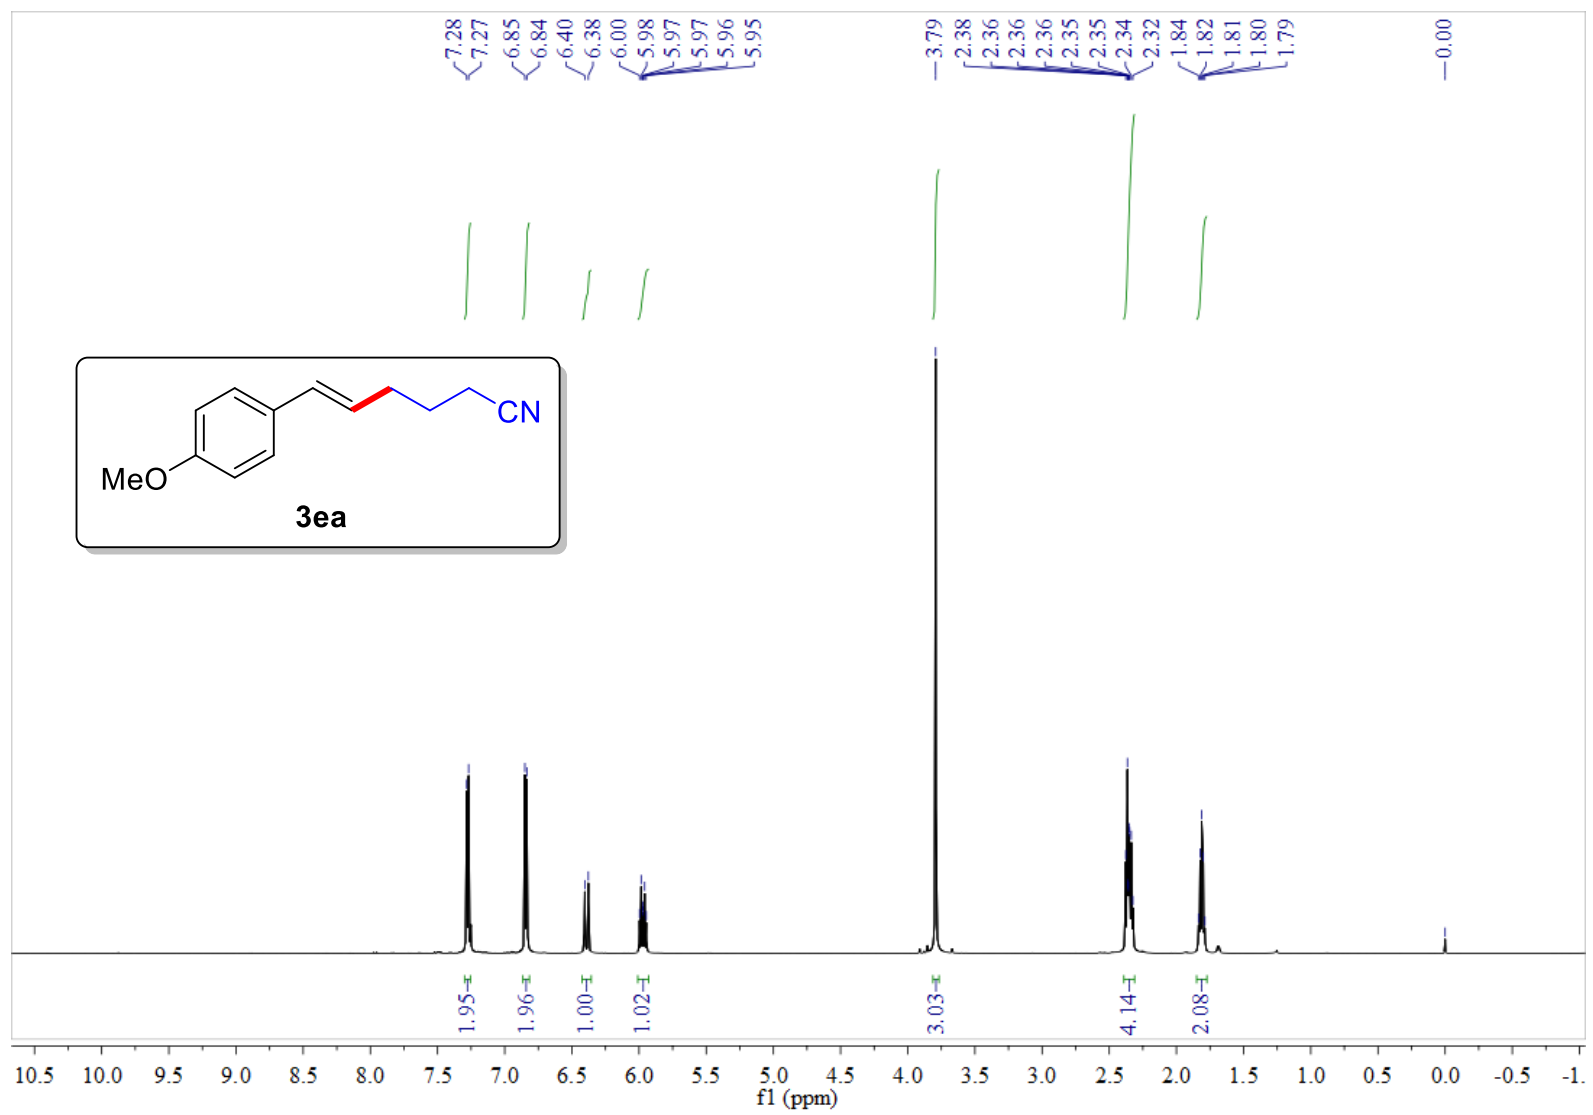

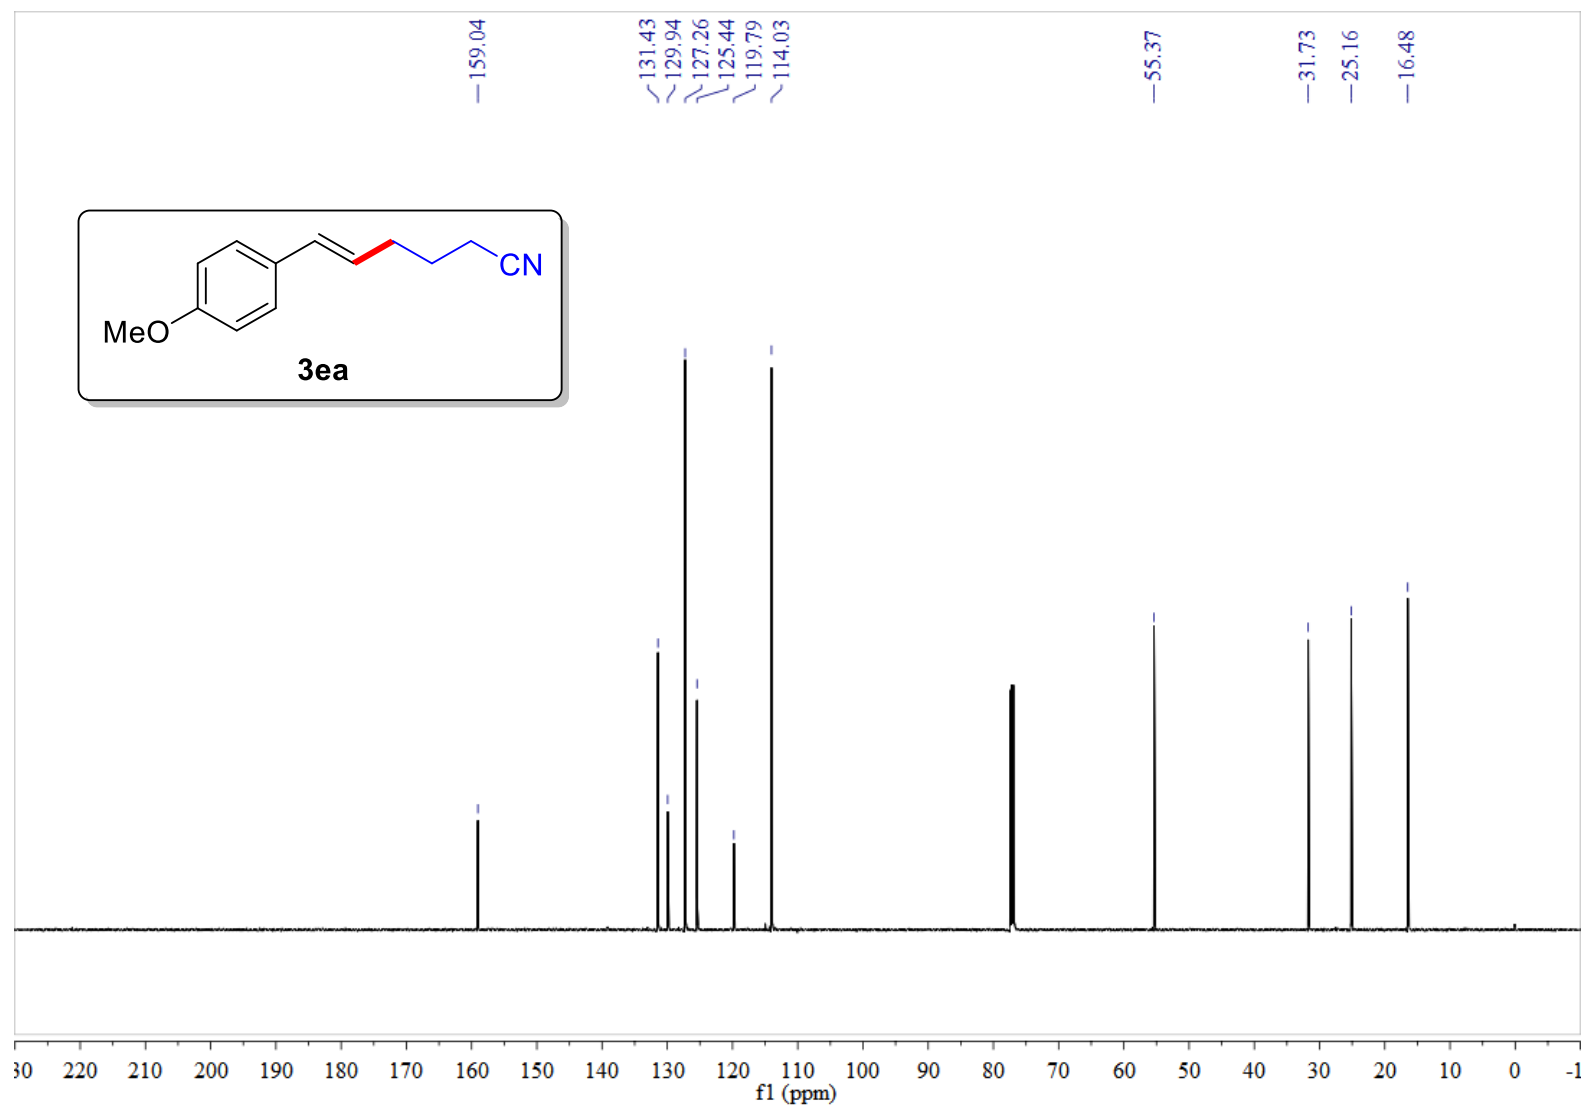

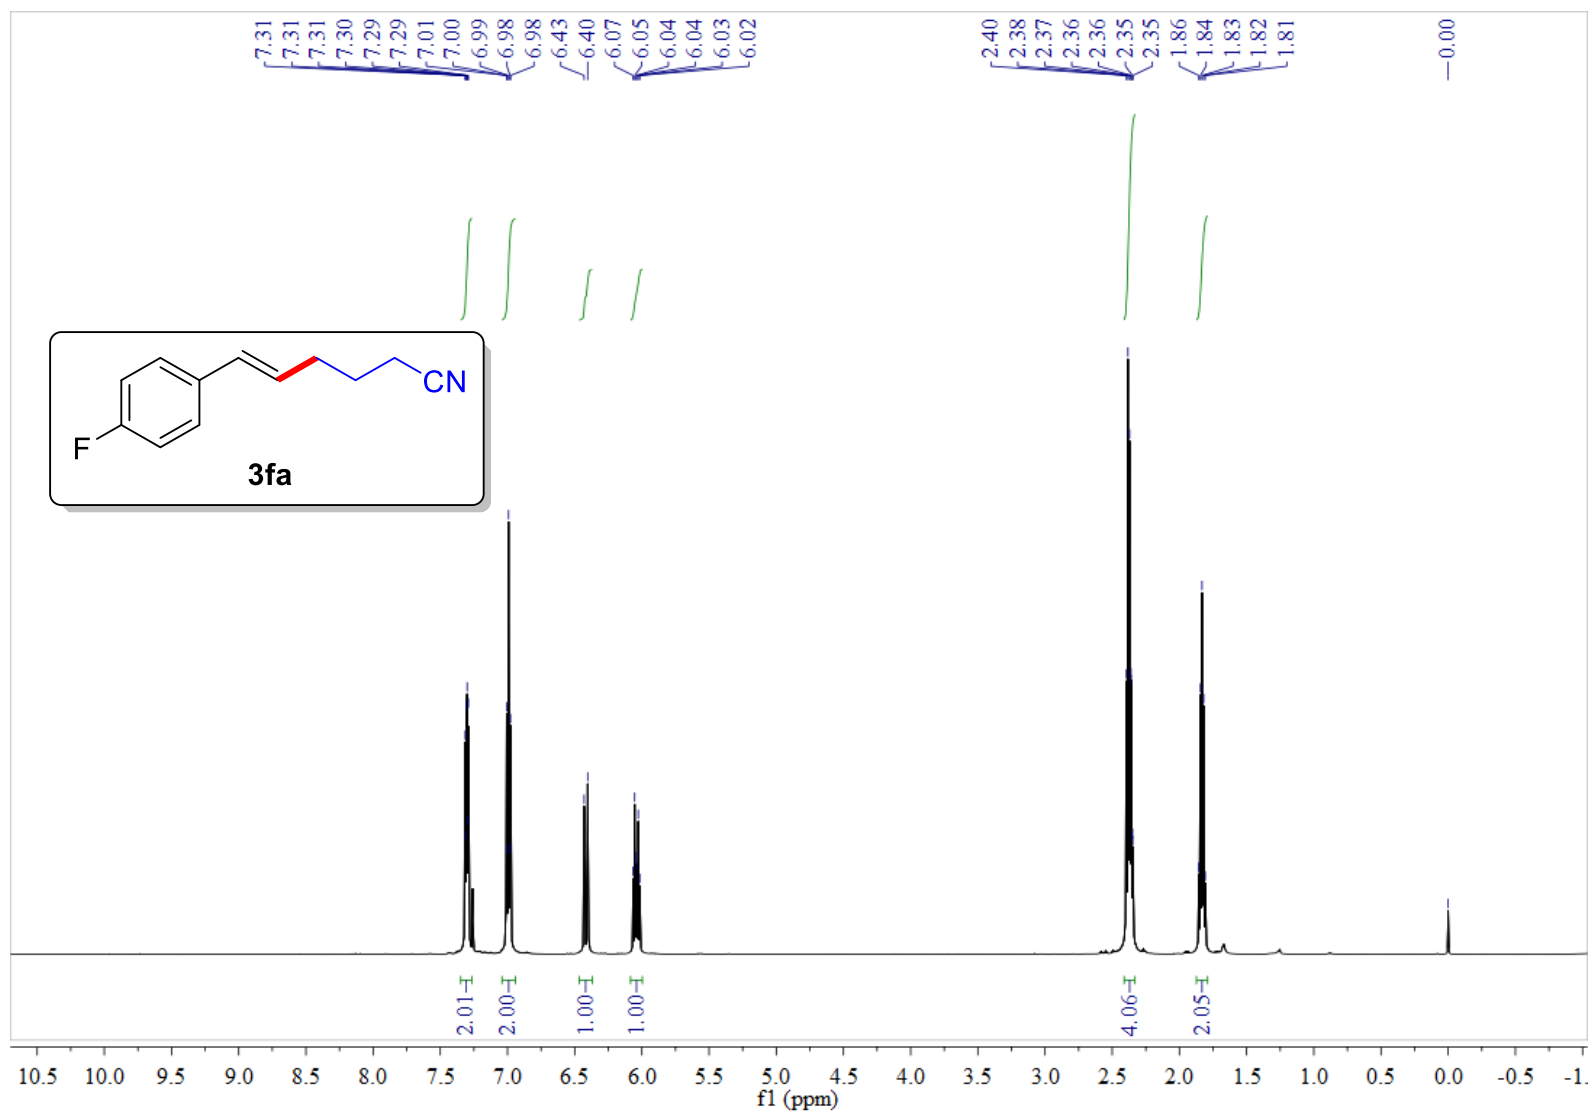

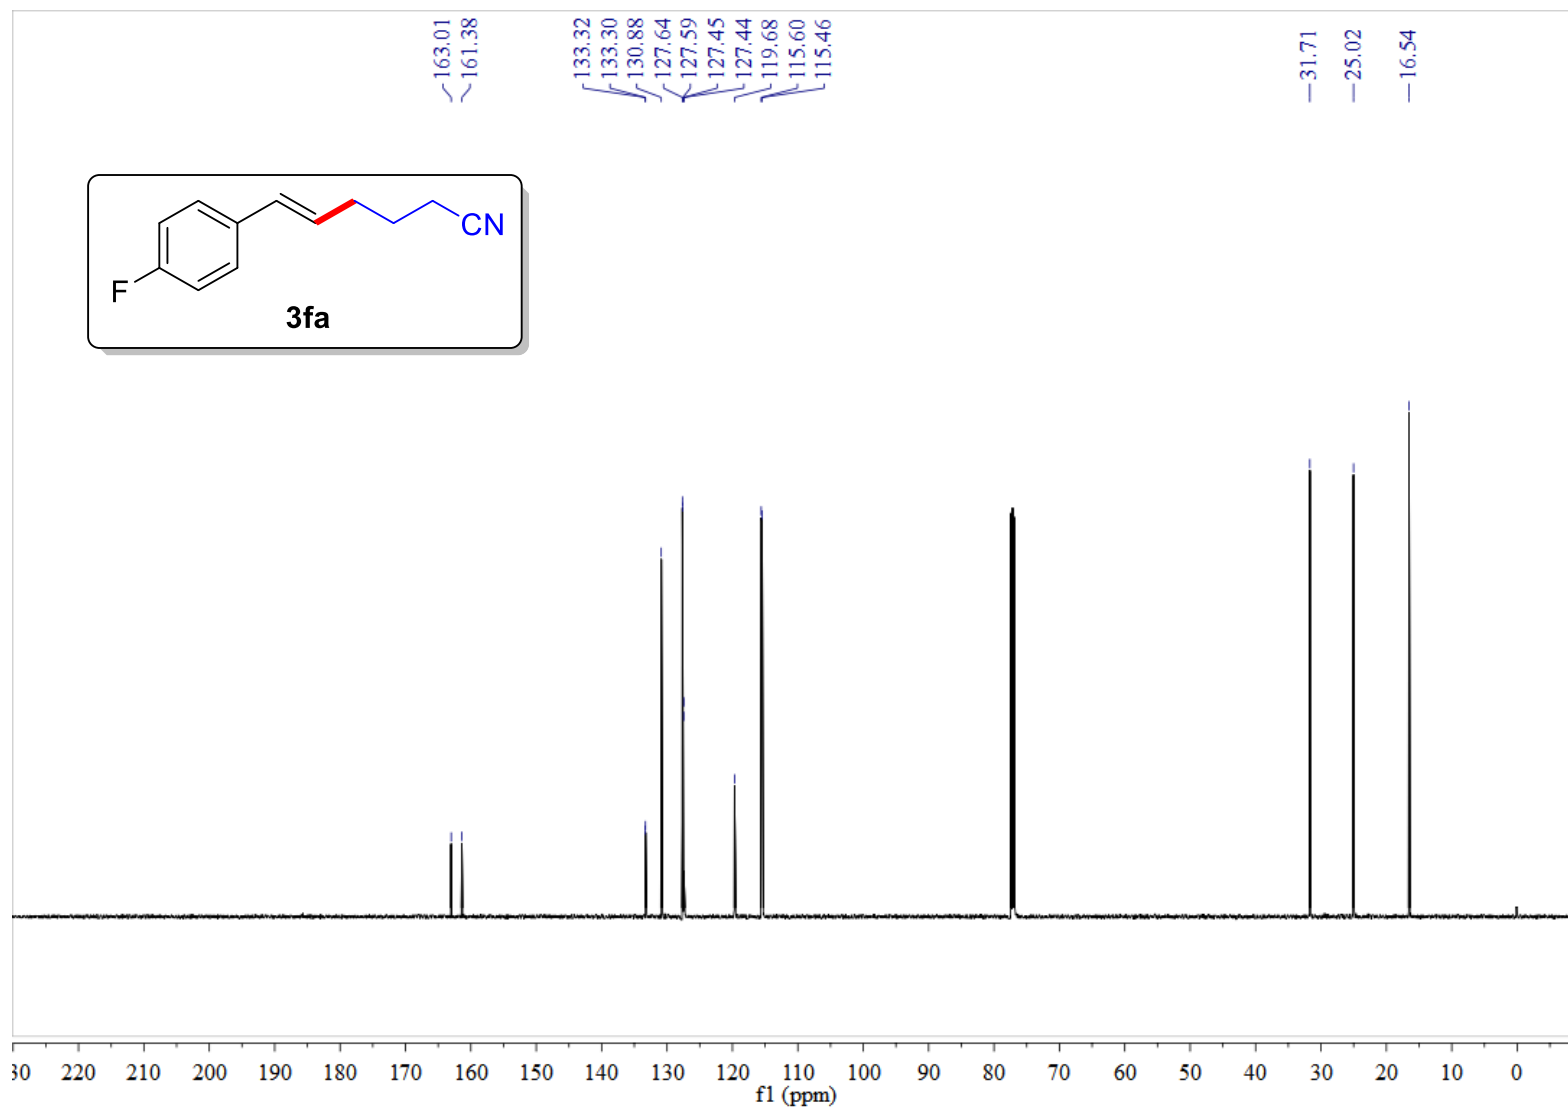

6

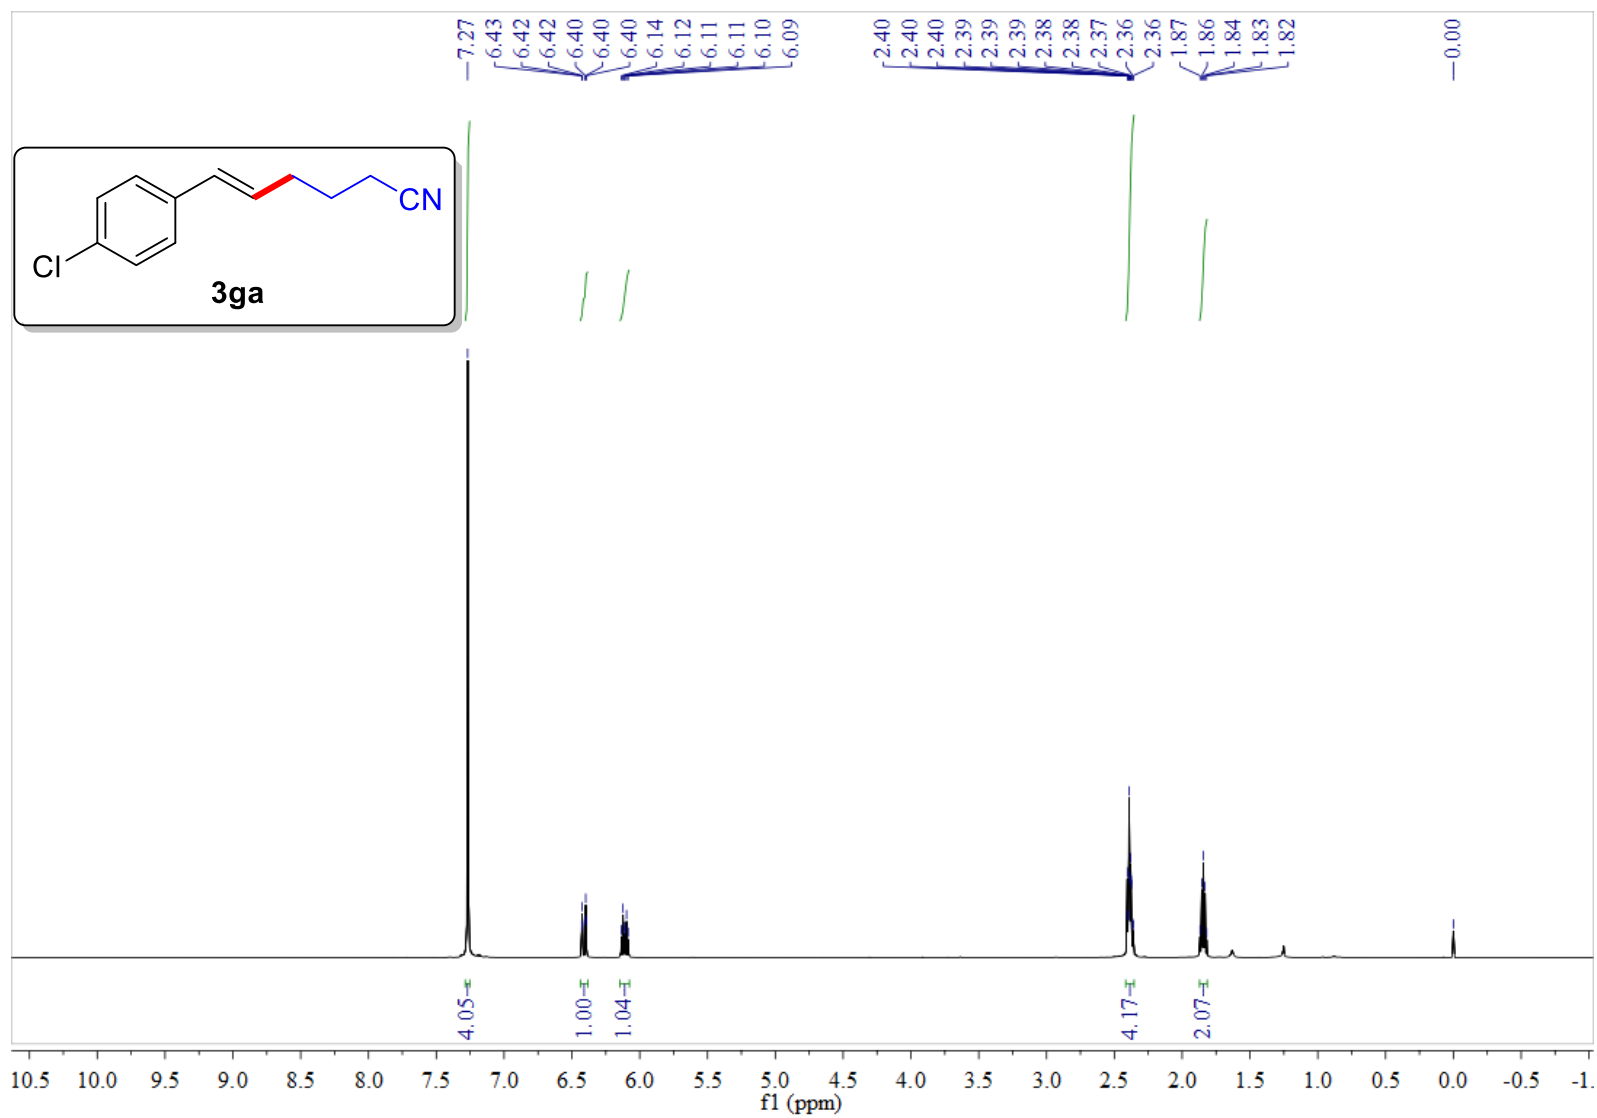

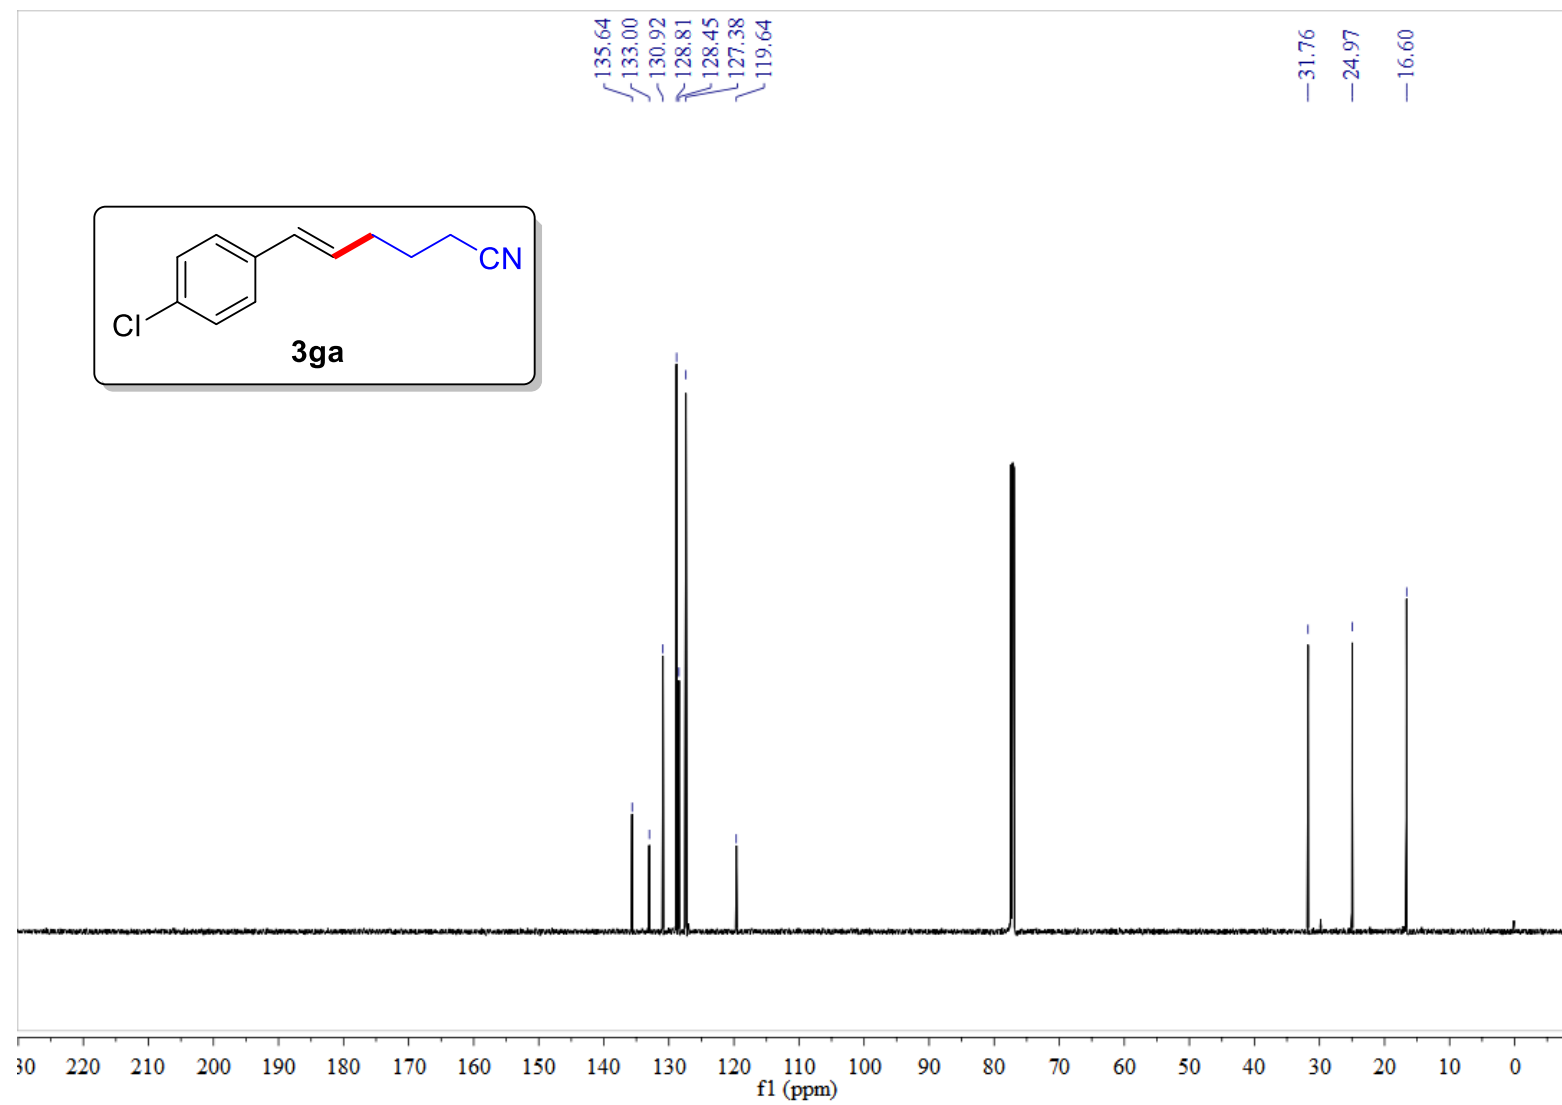



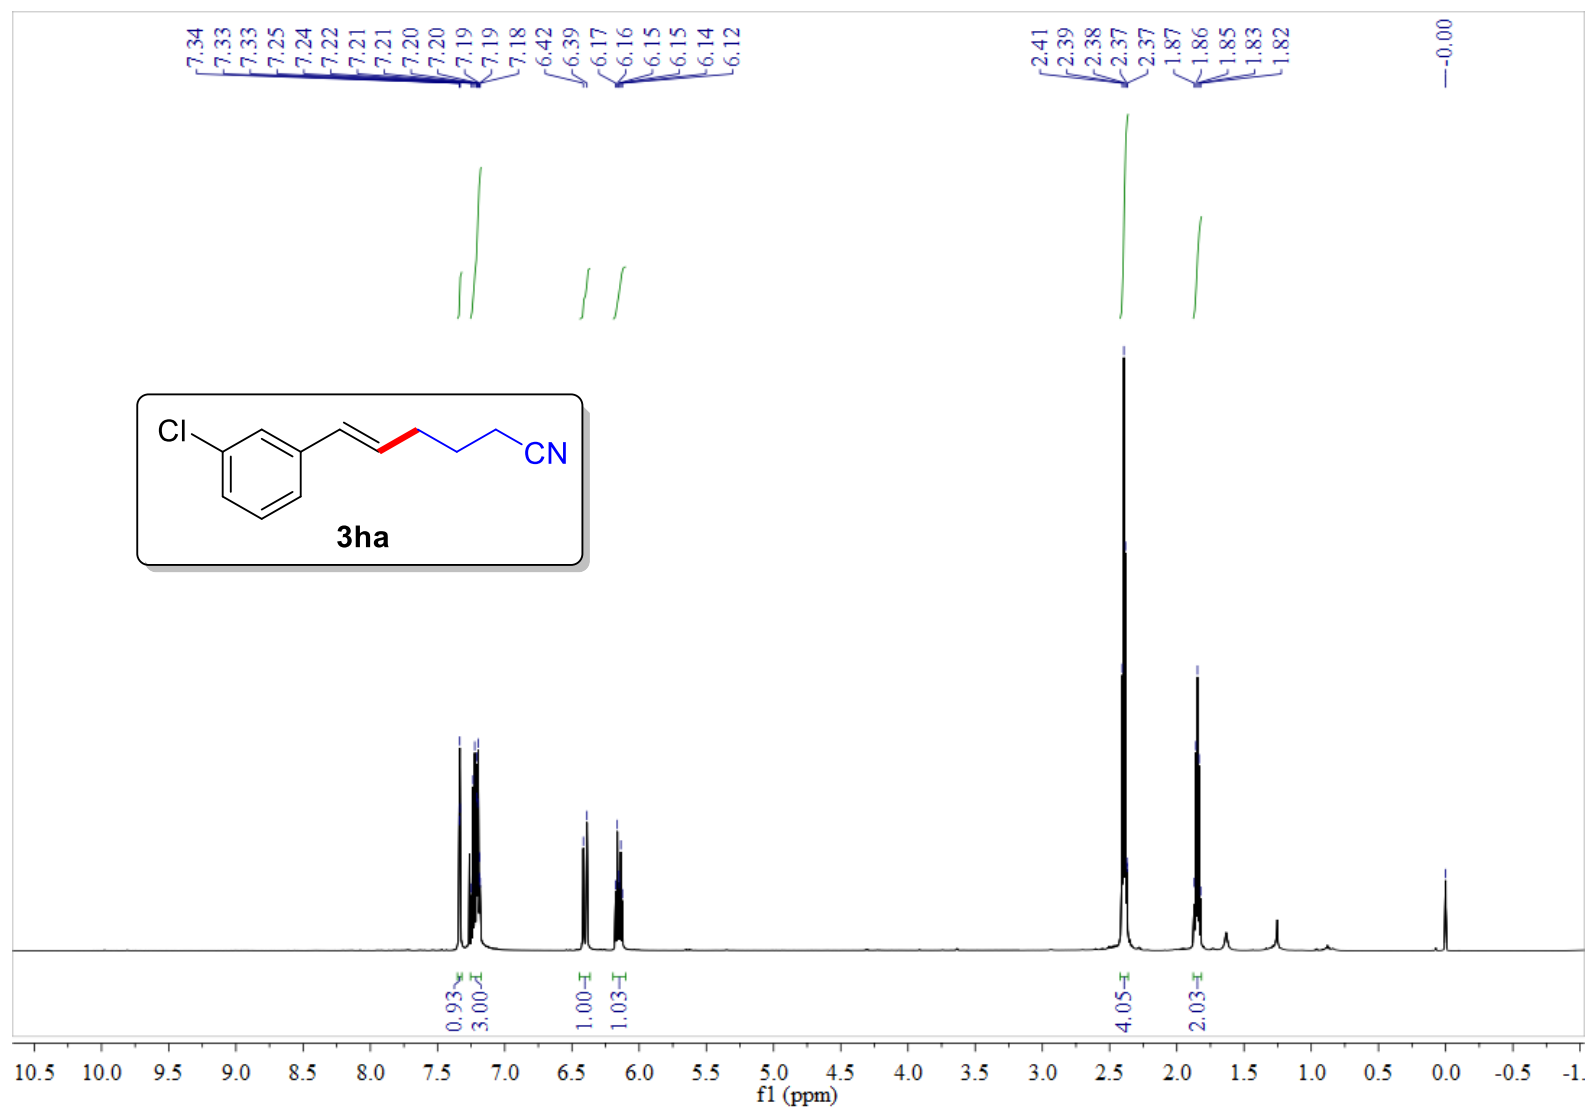

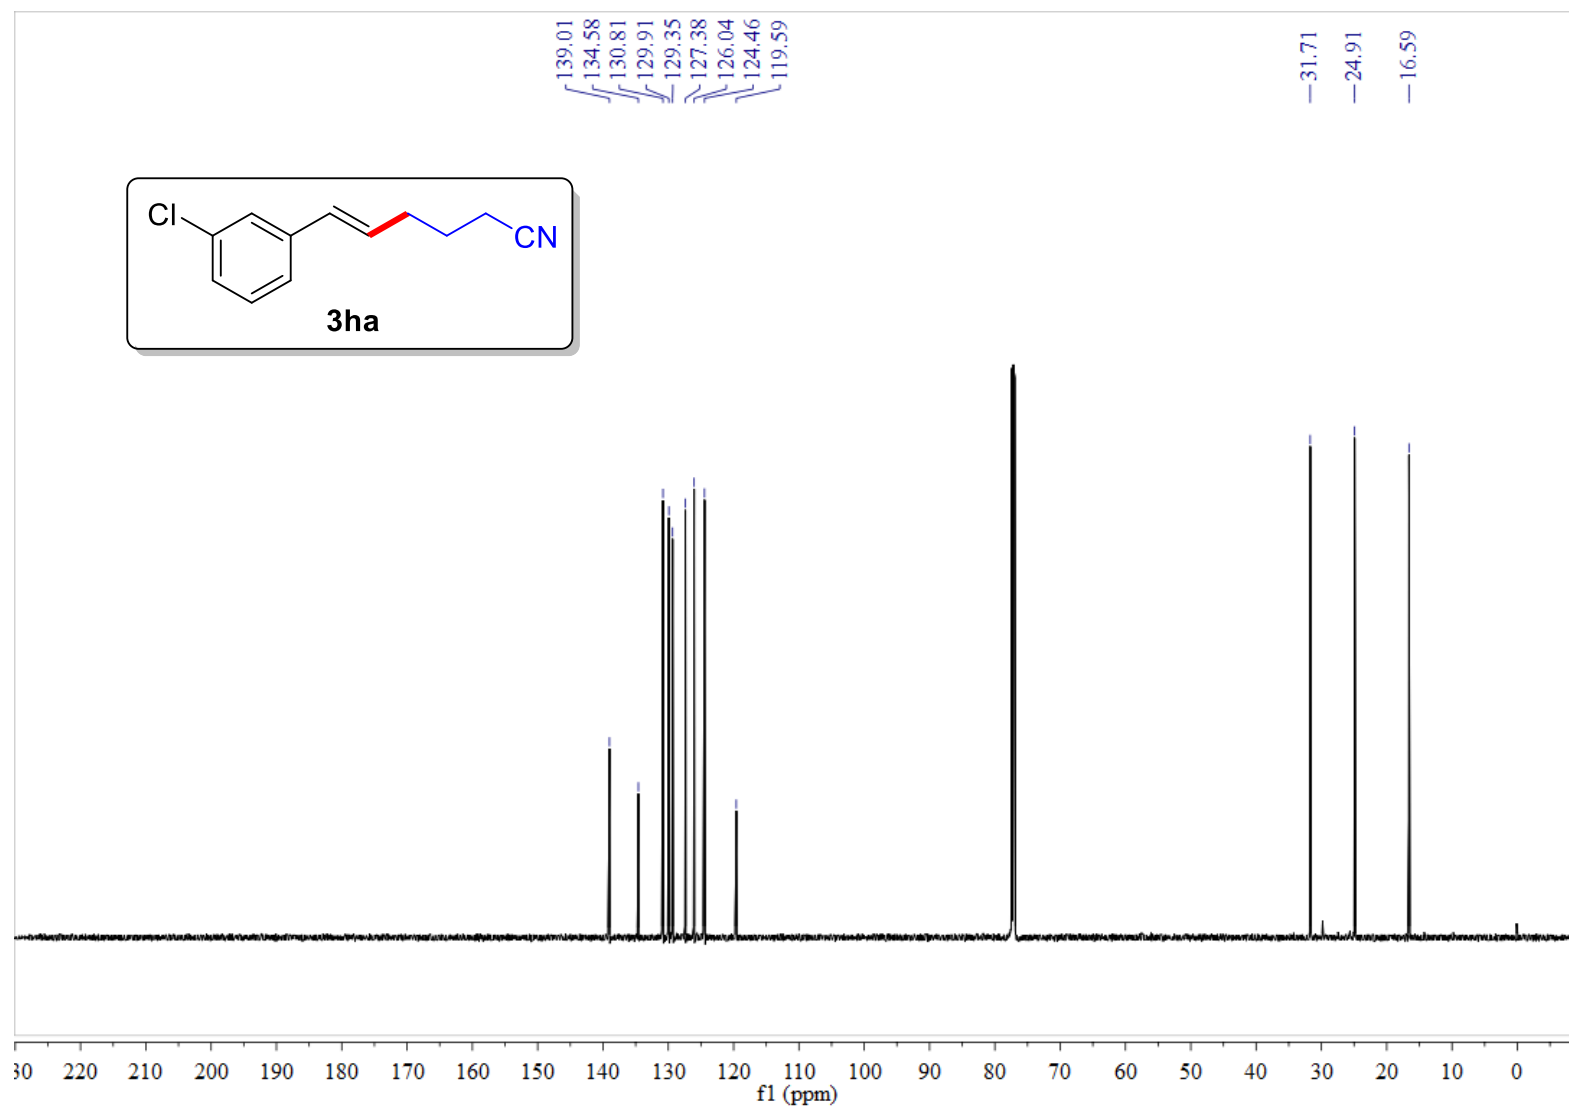

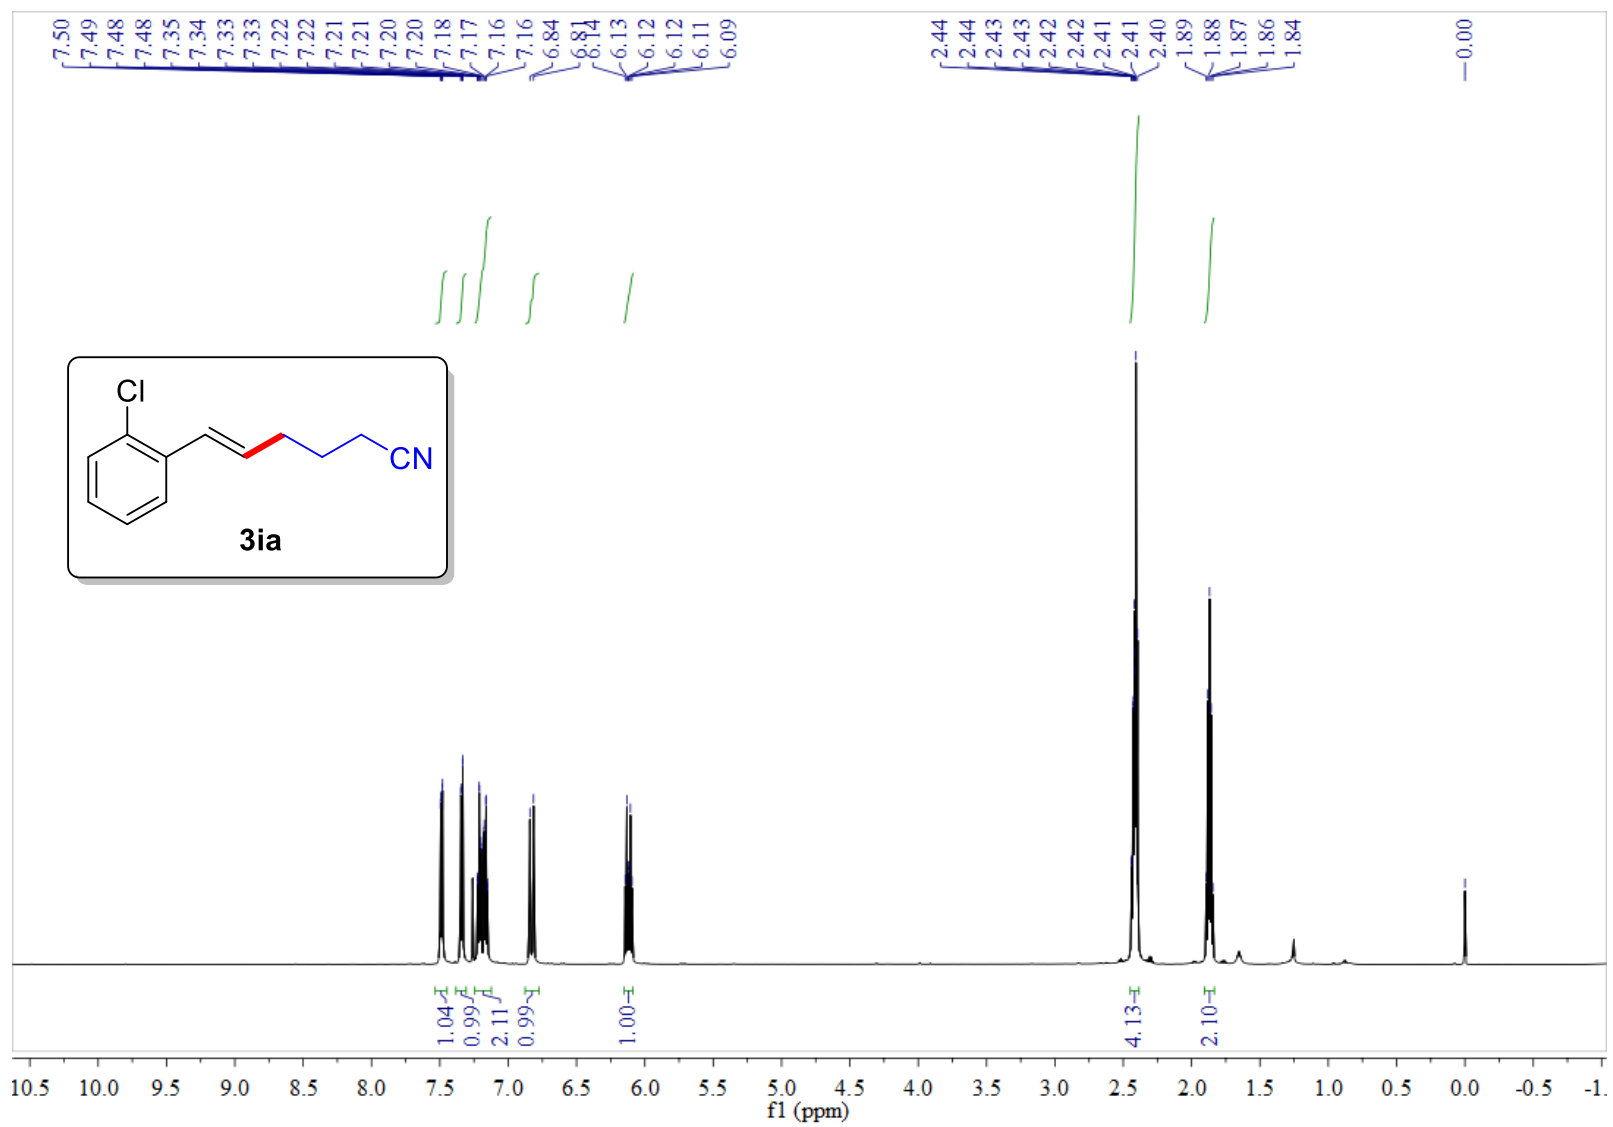

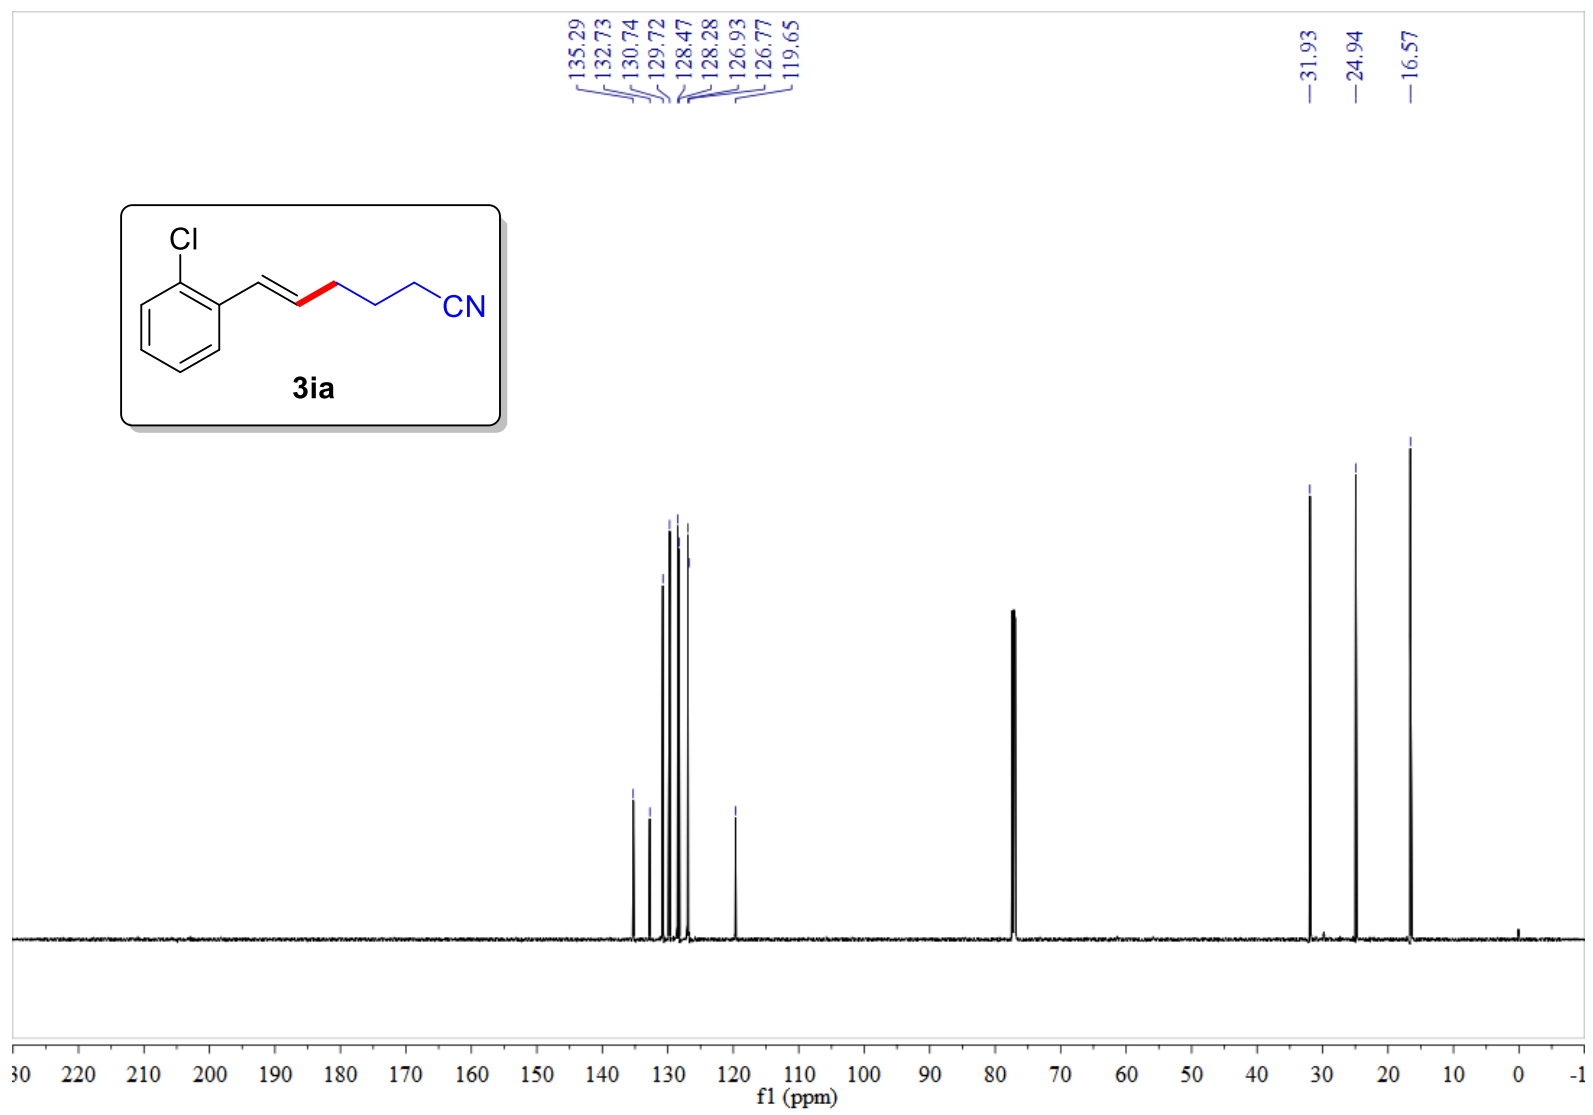

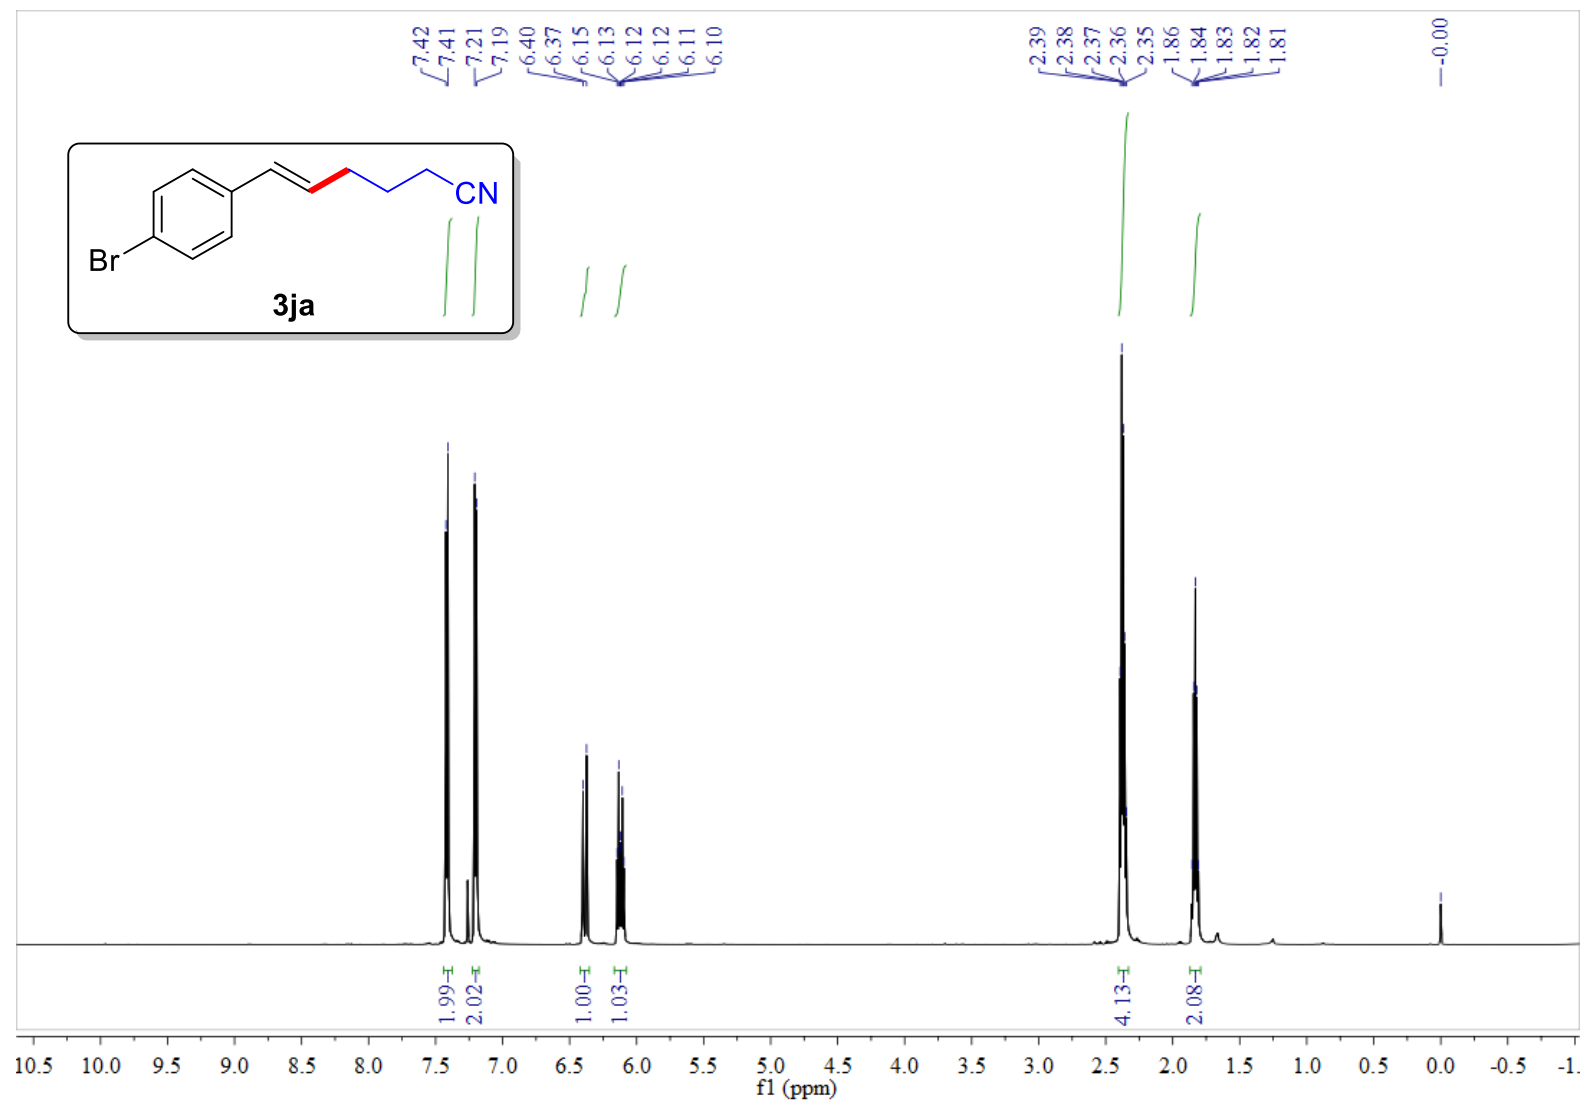

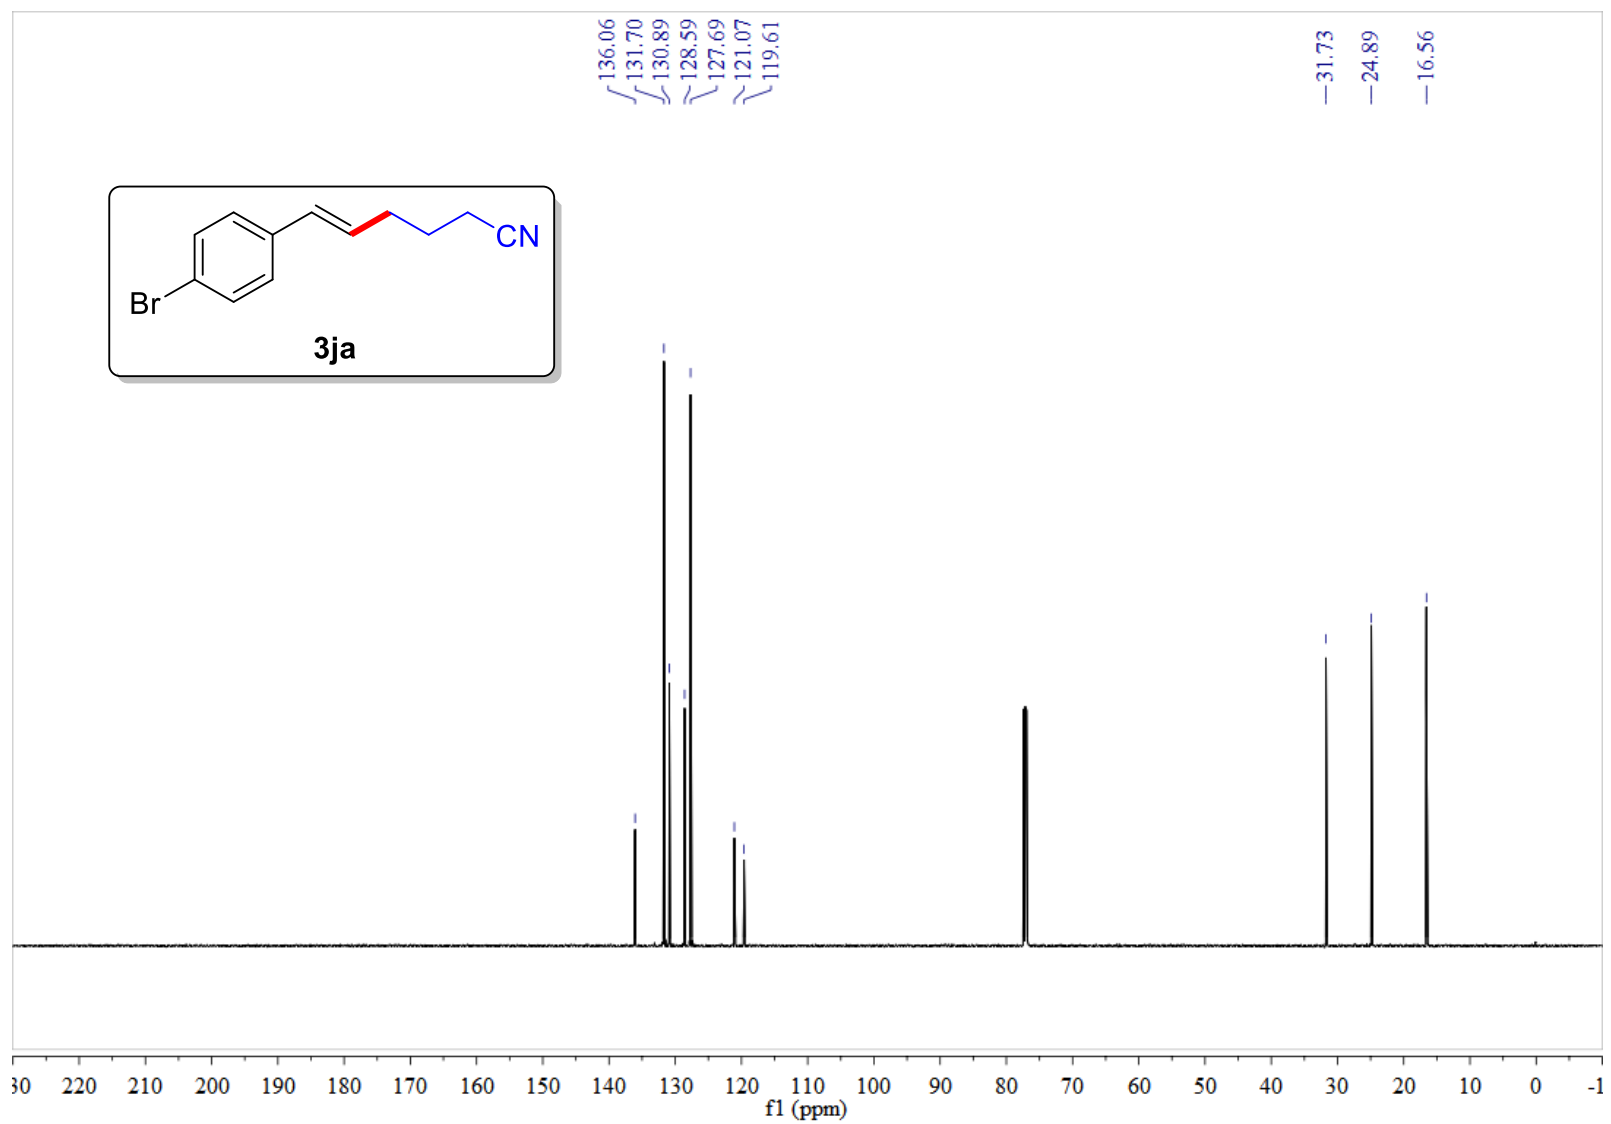

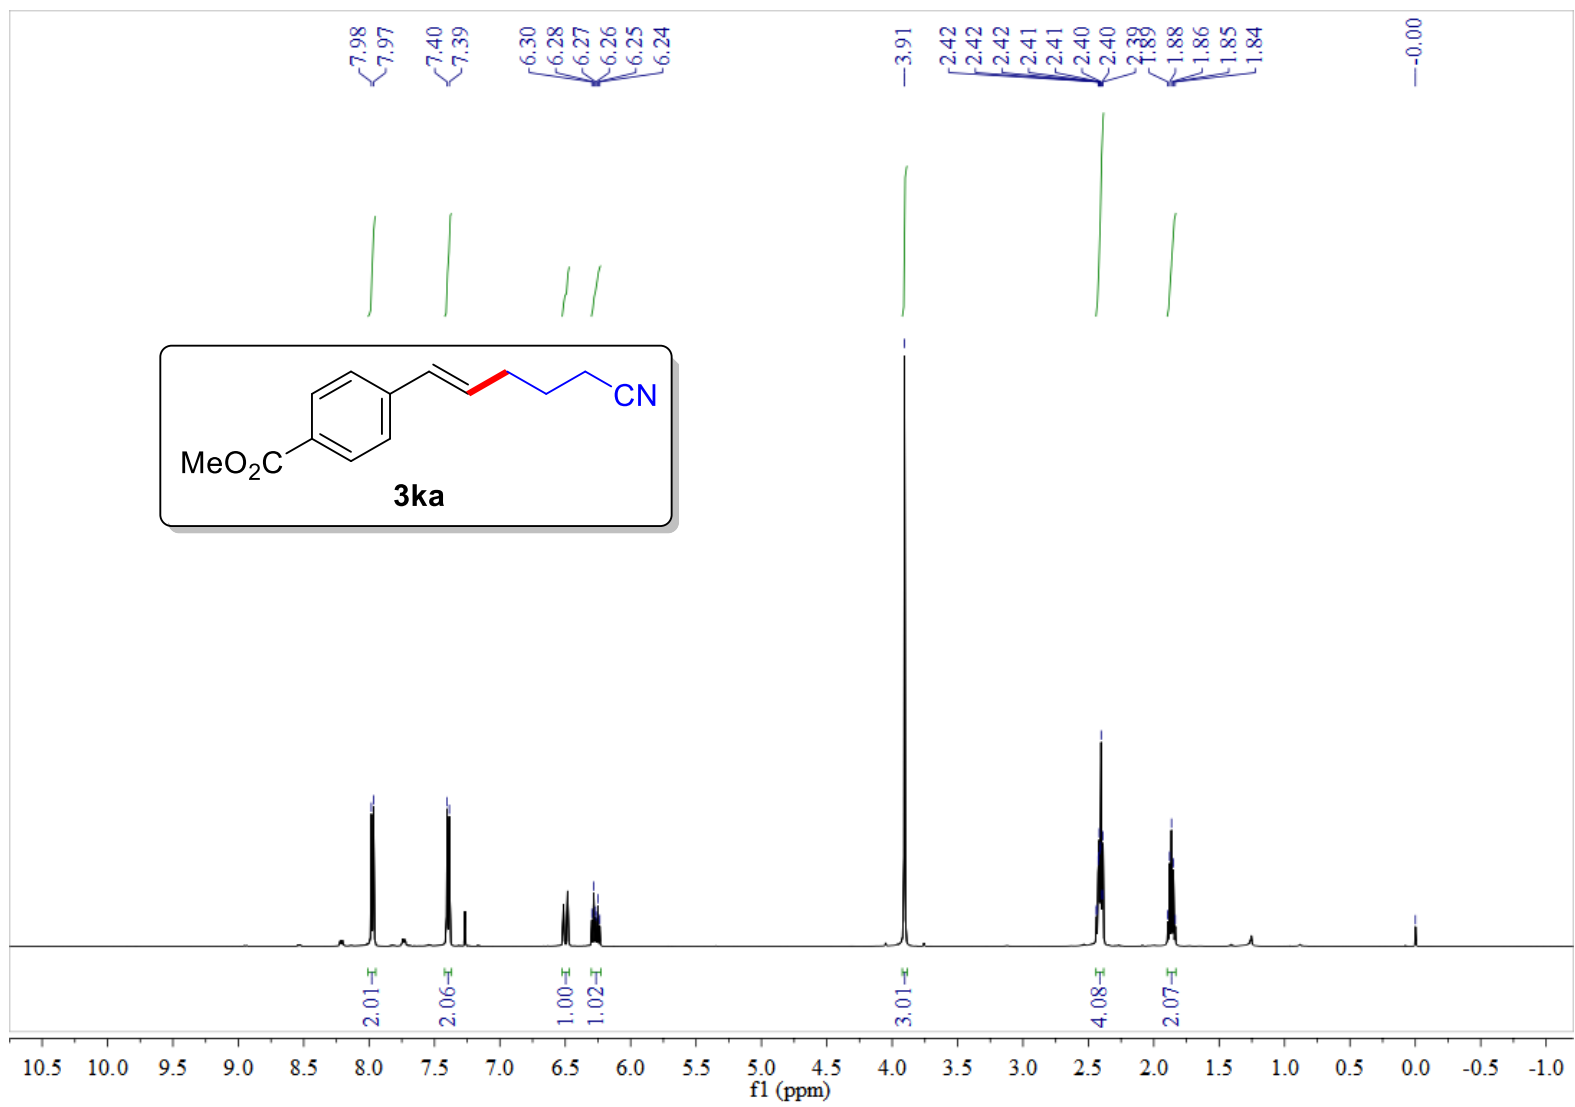

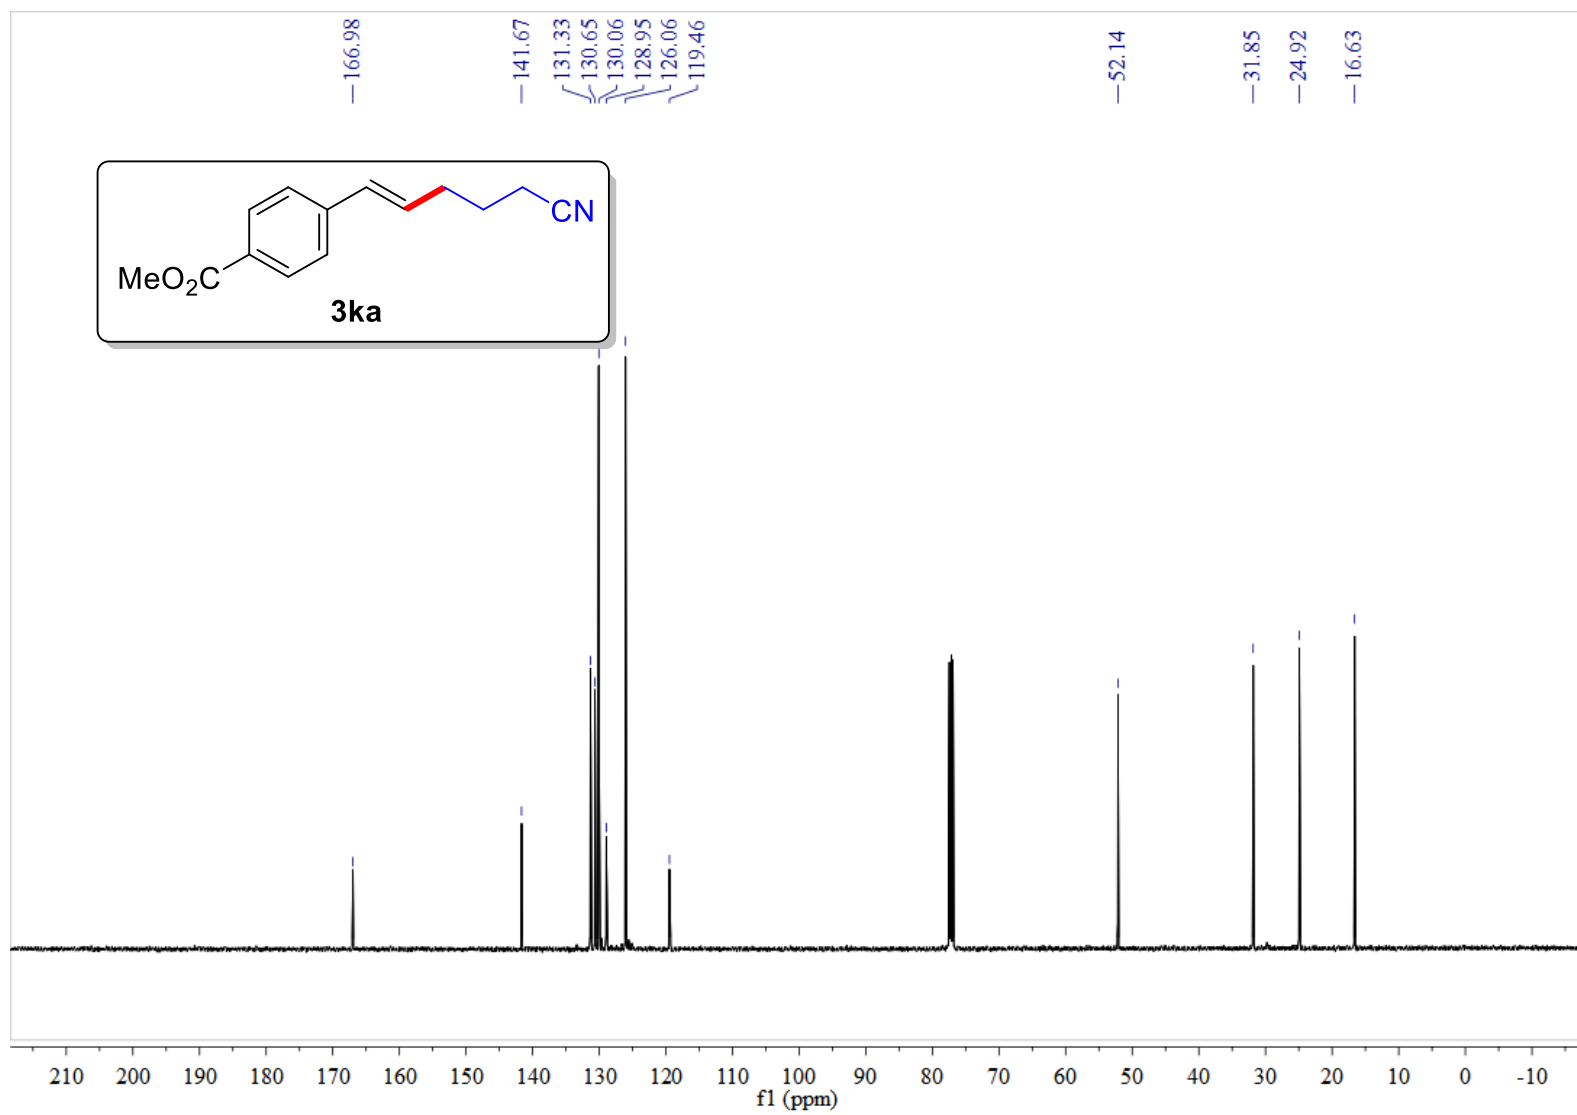



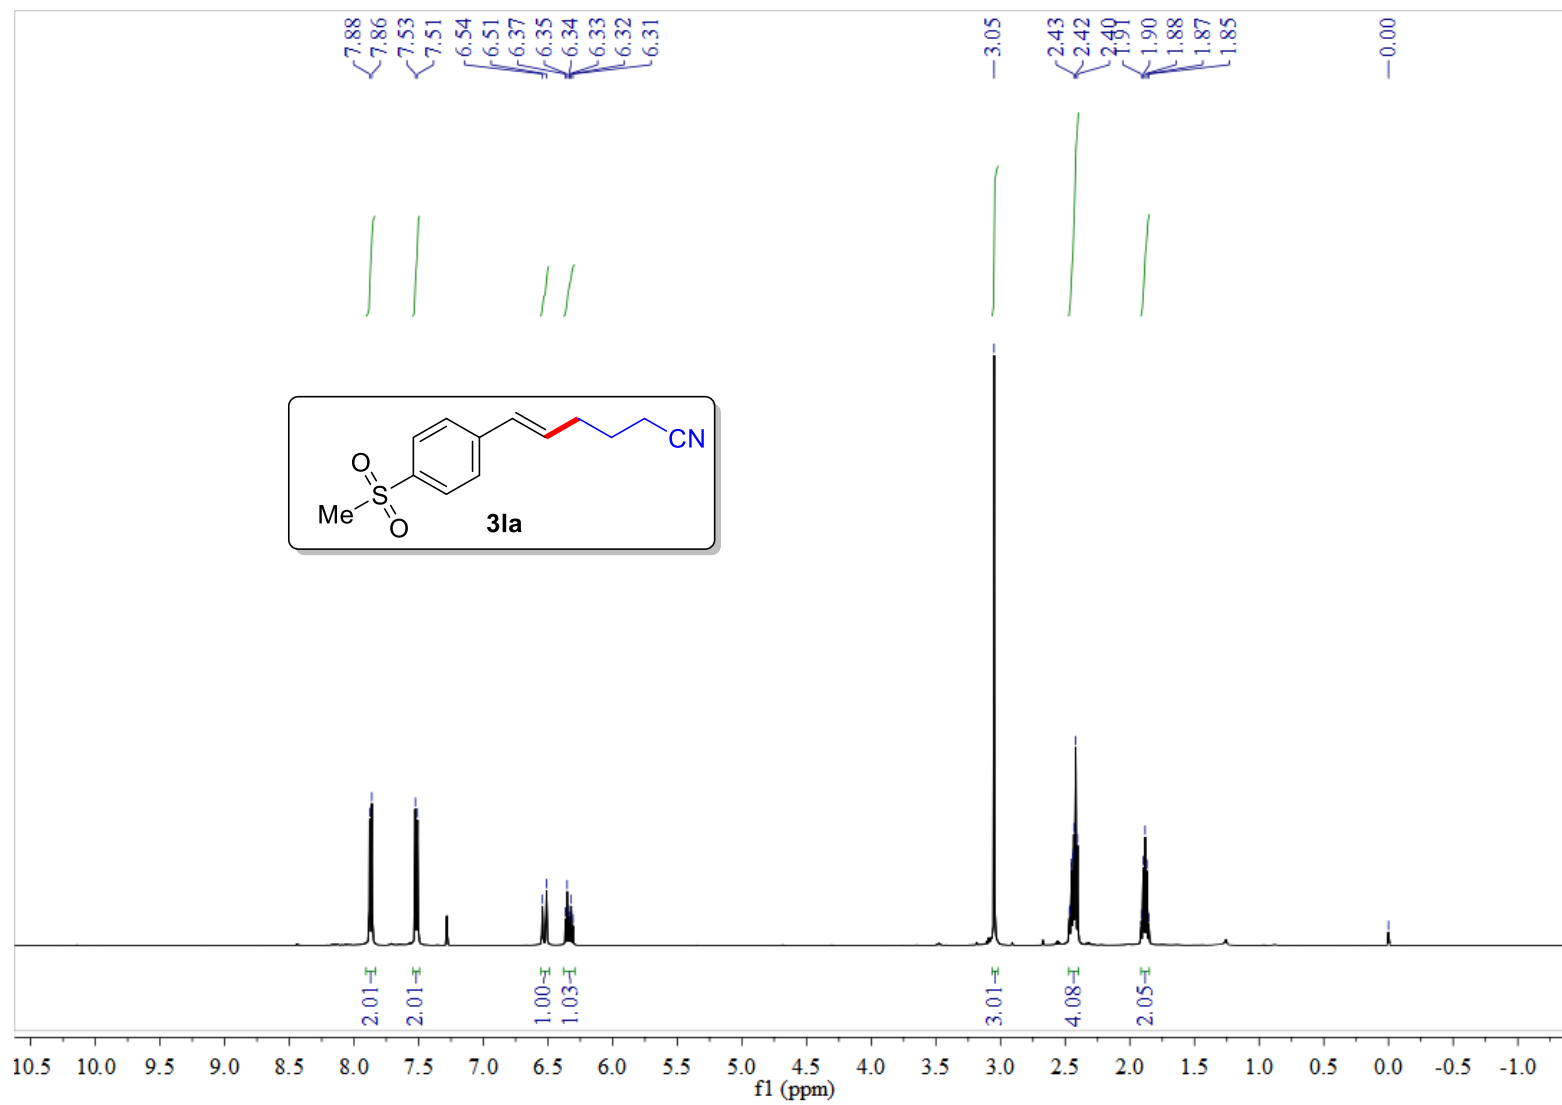

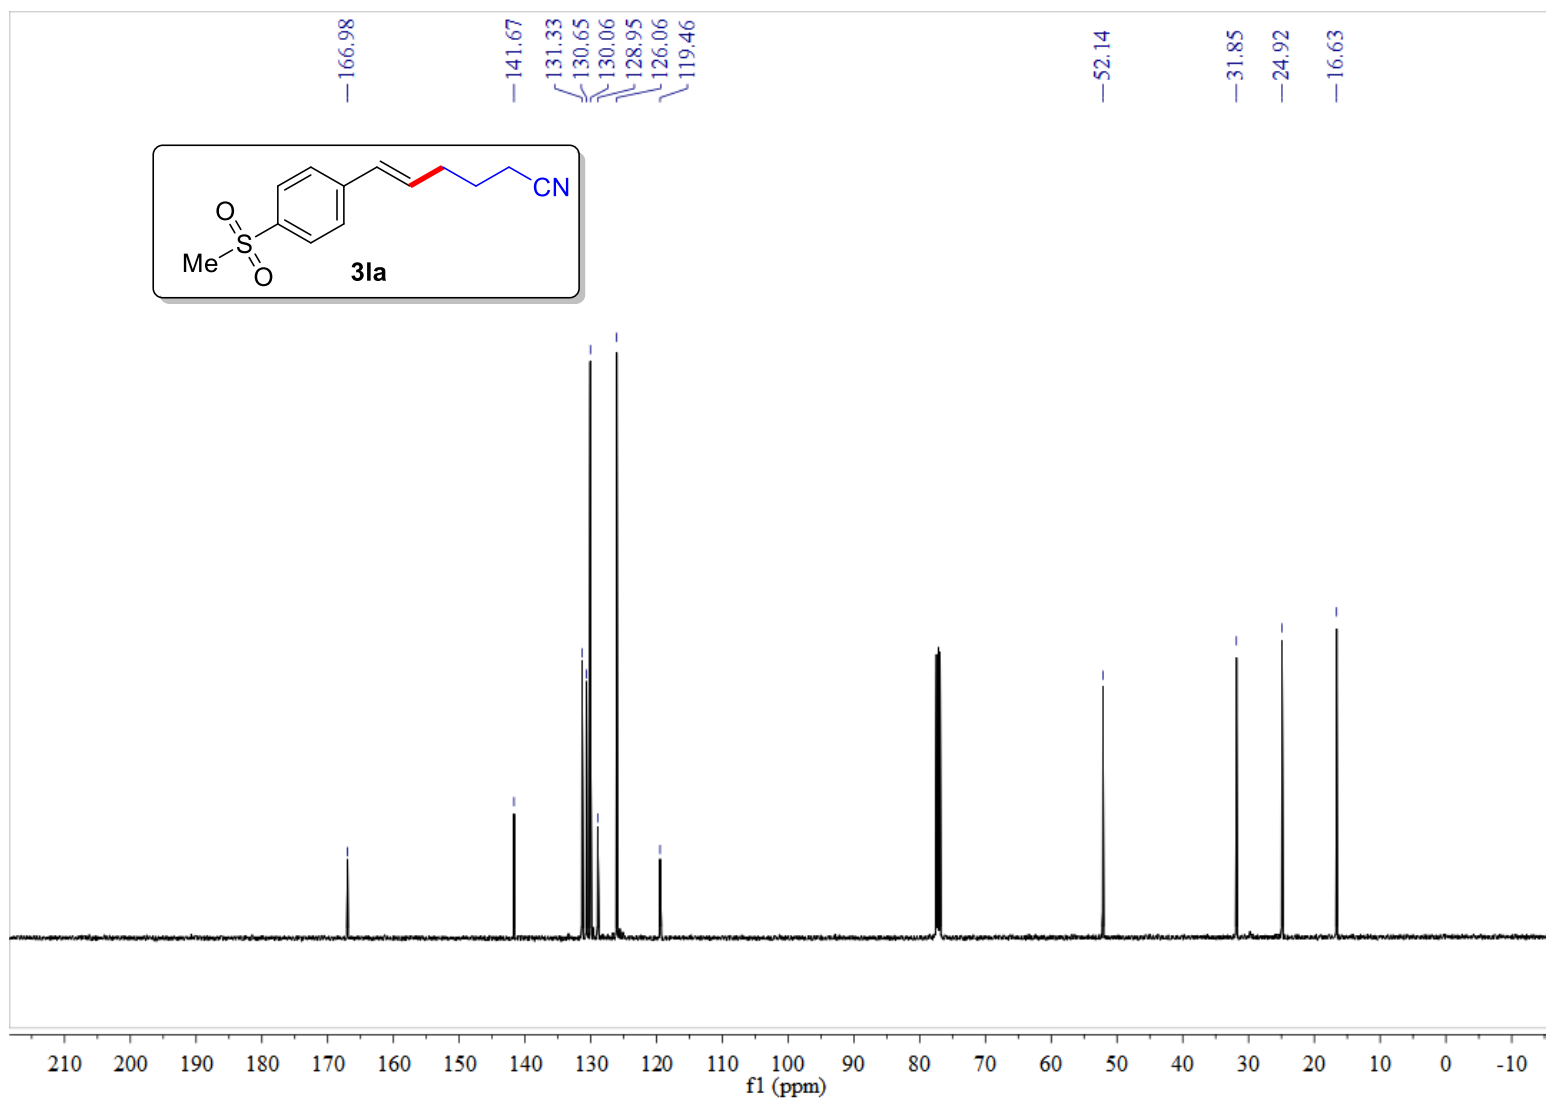

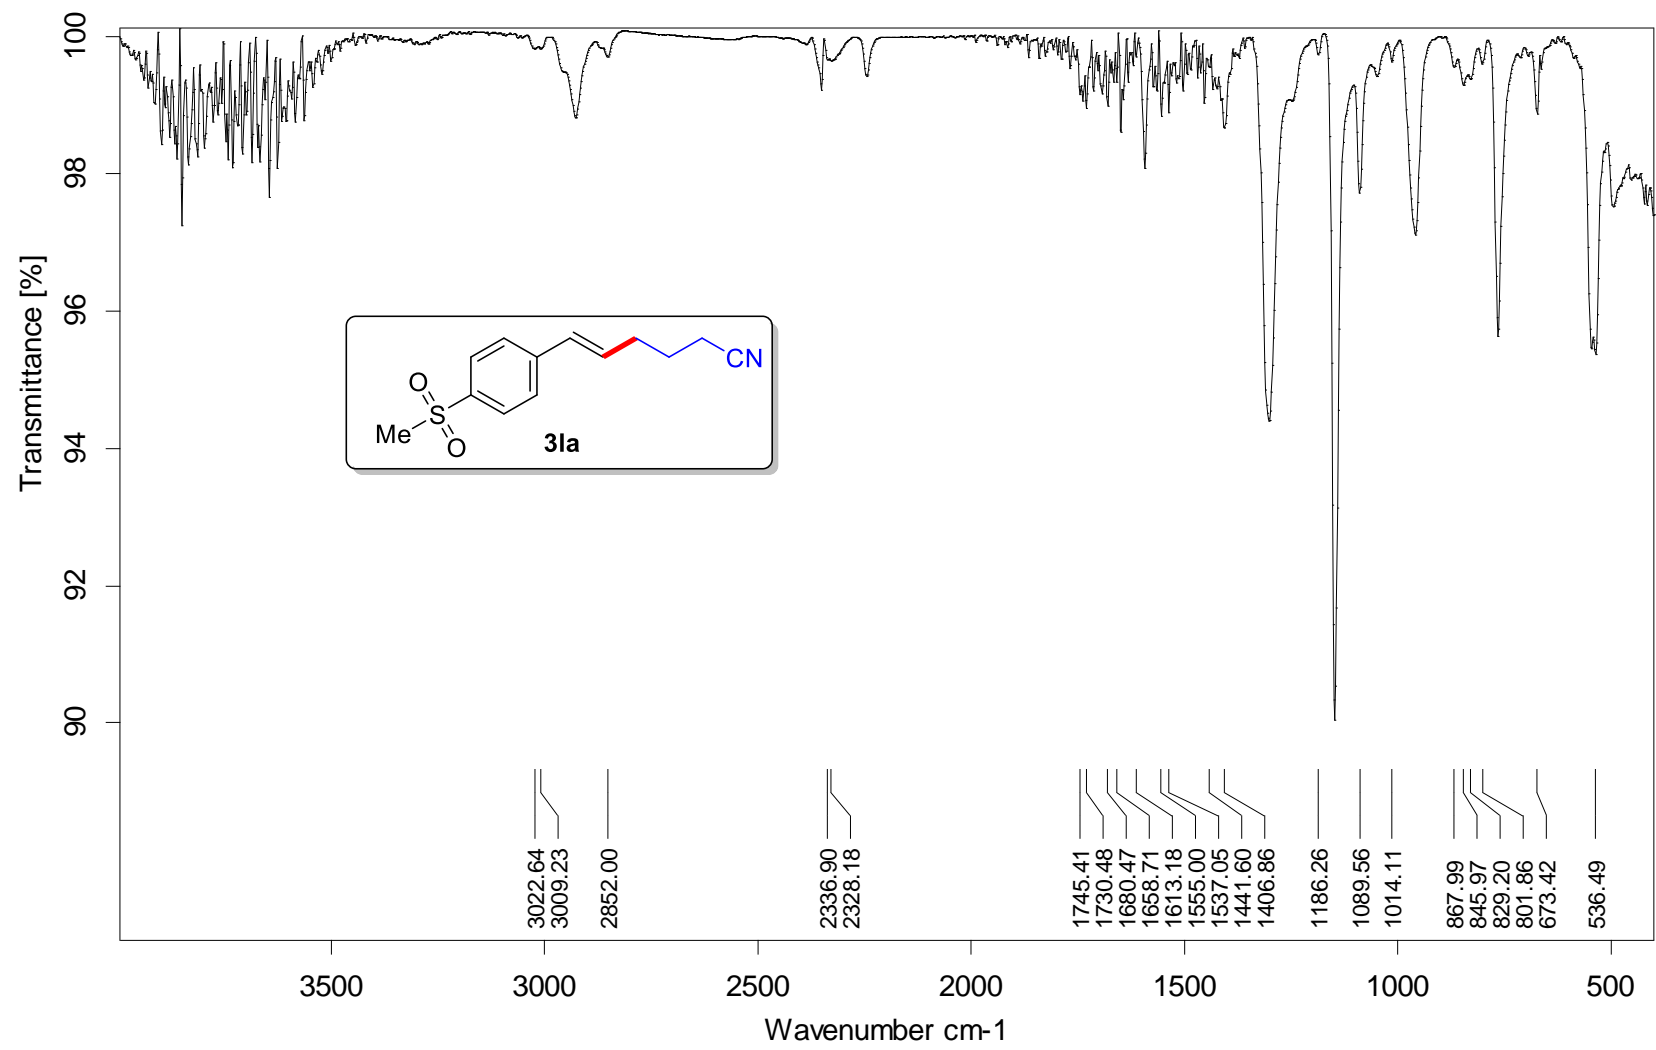

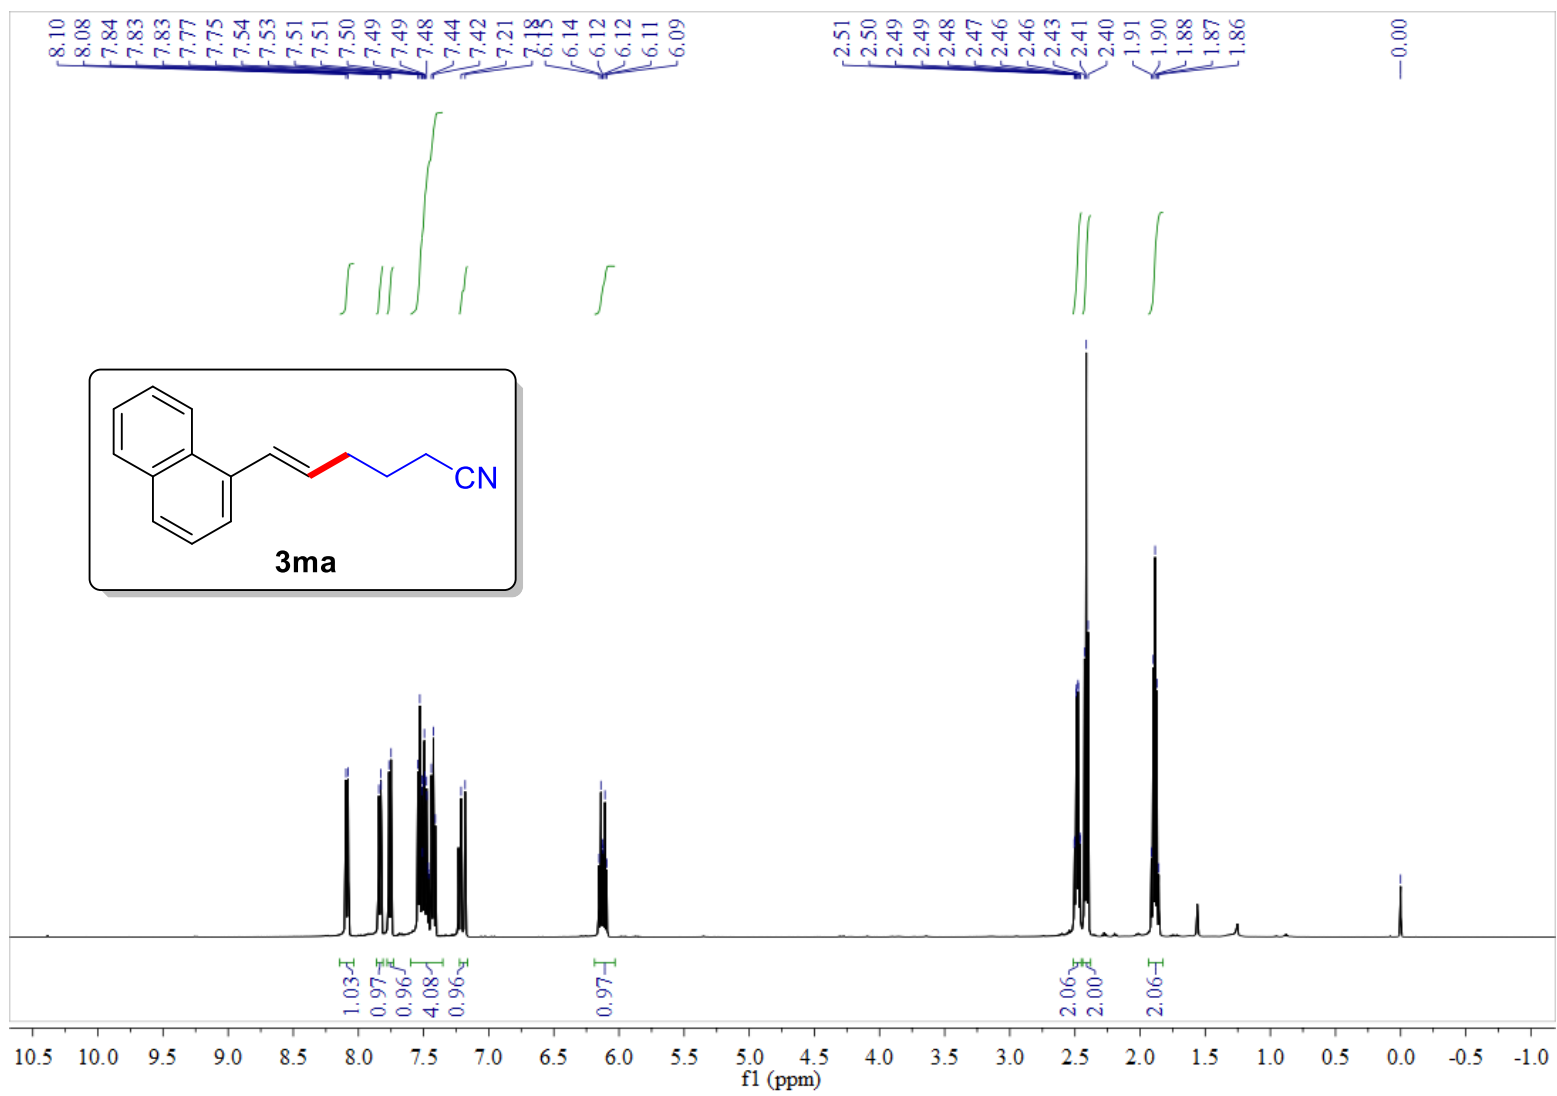

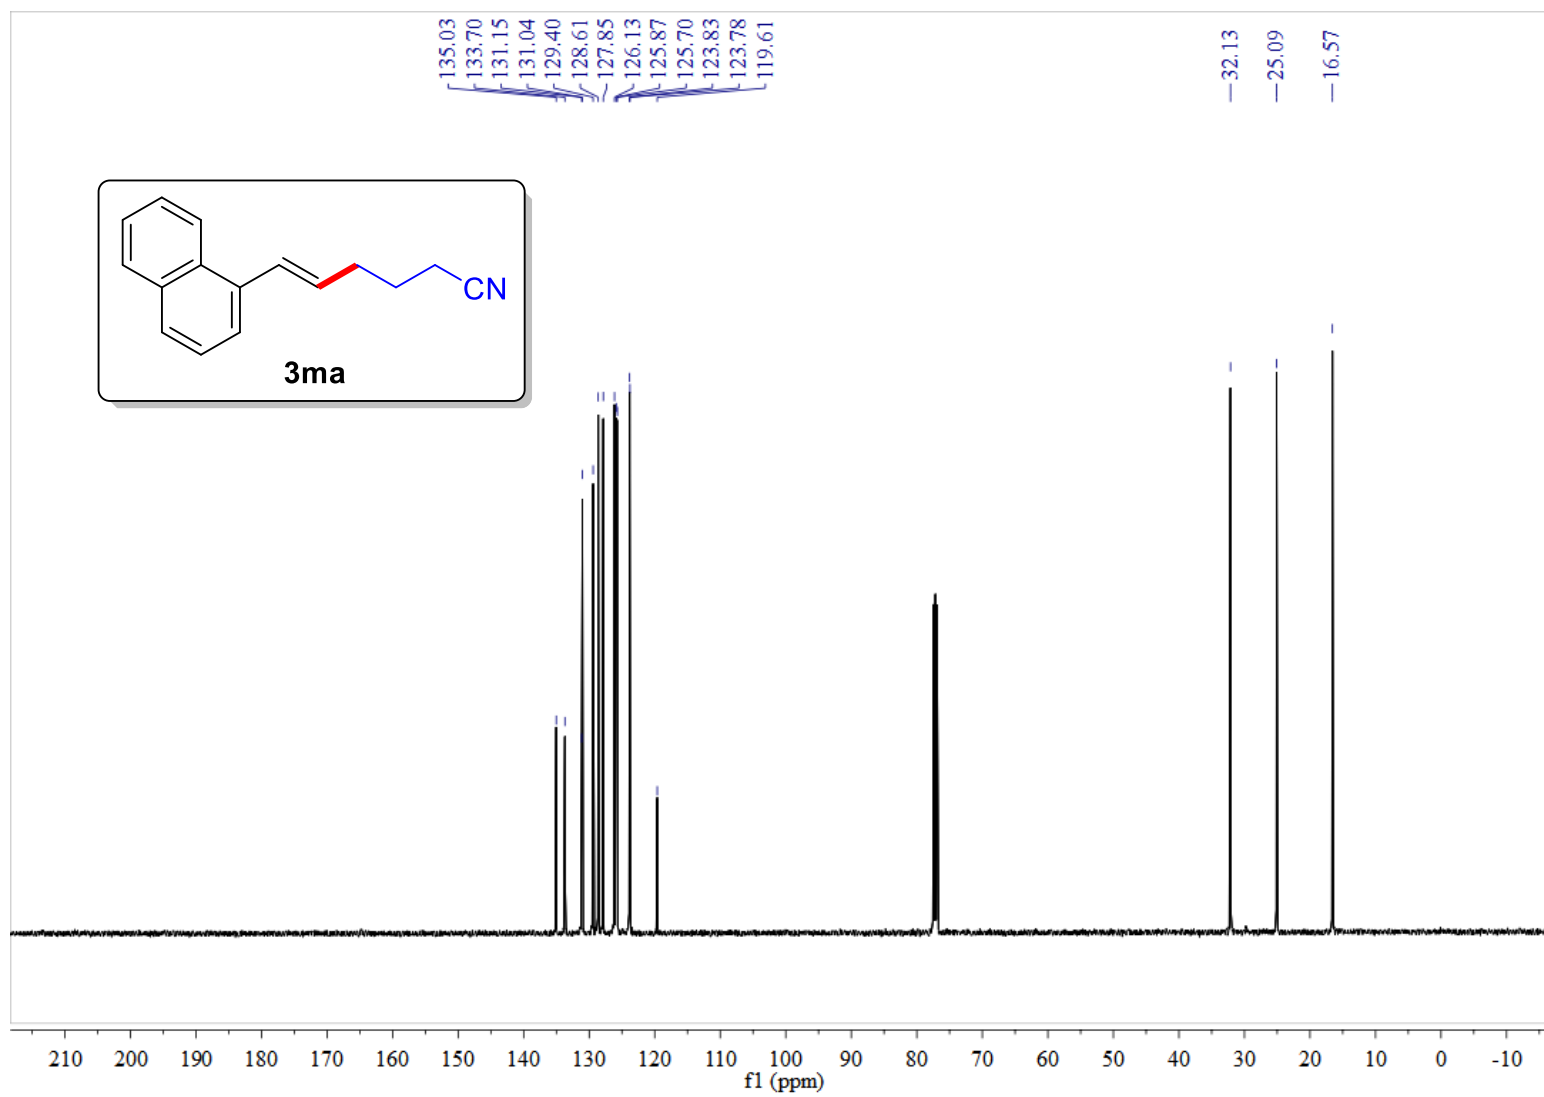

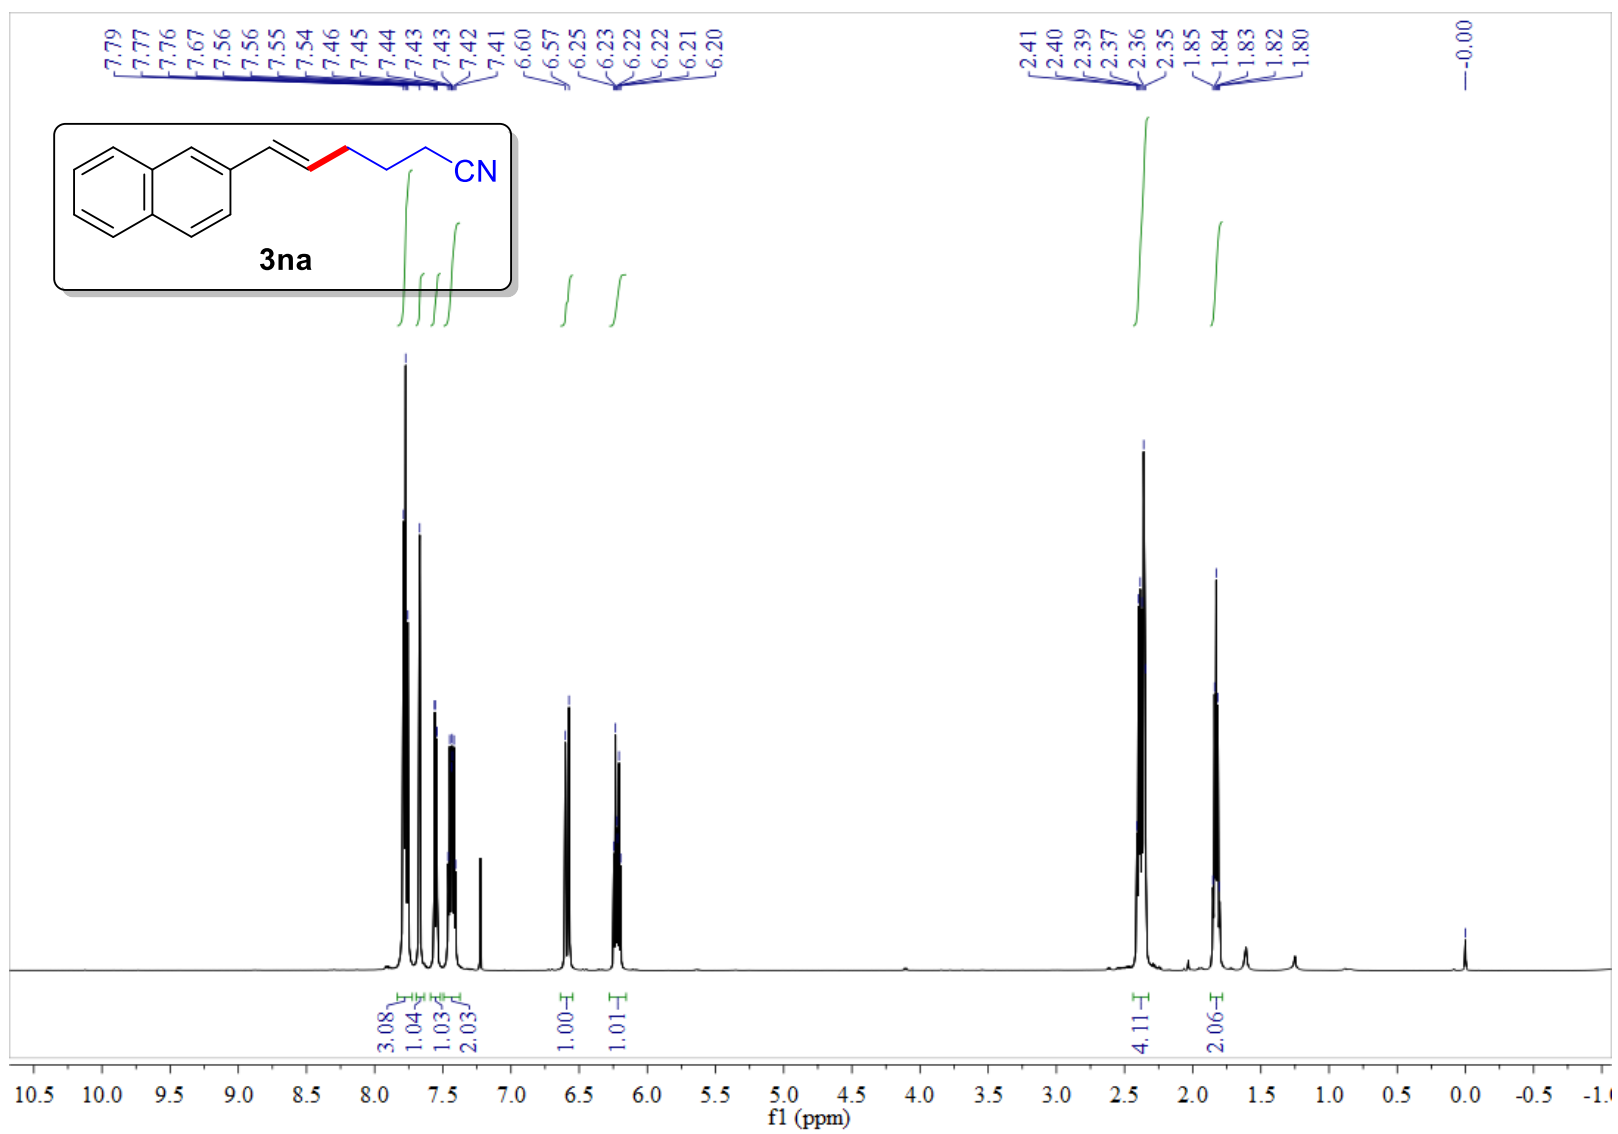

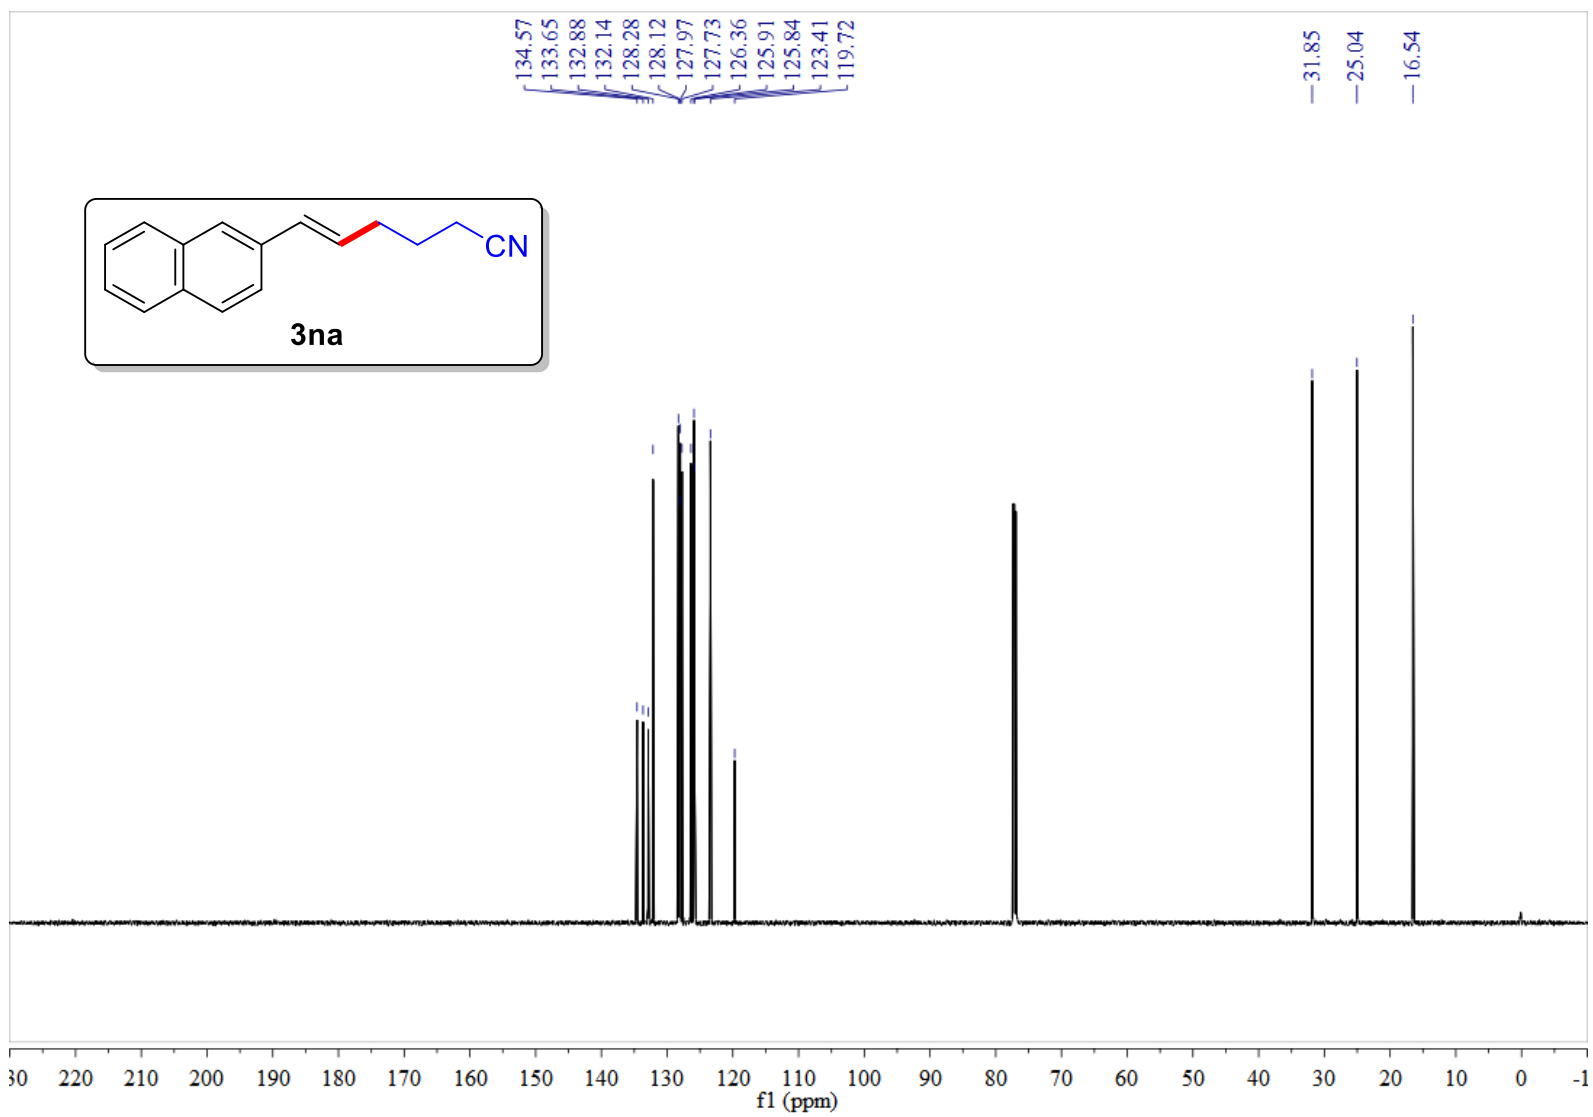

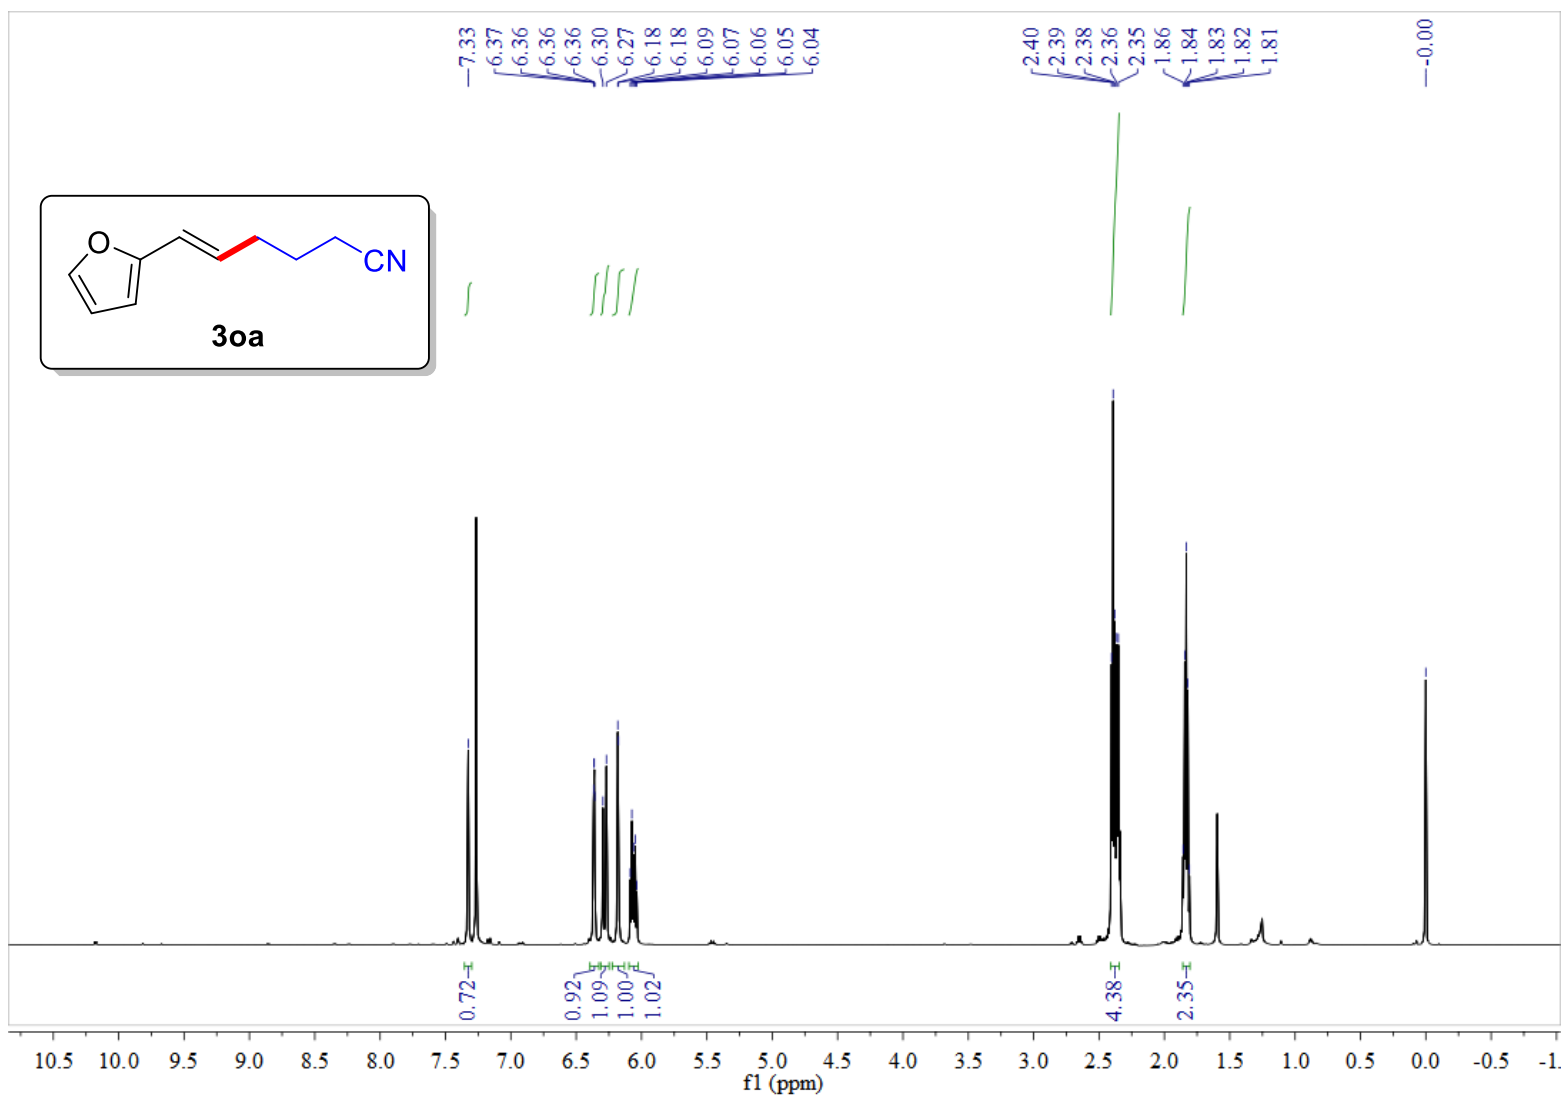



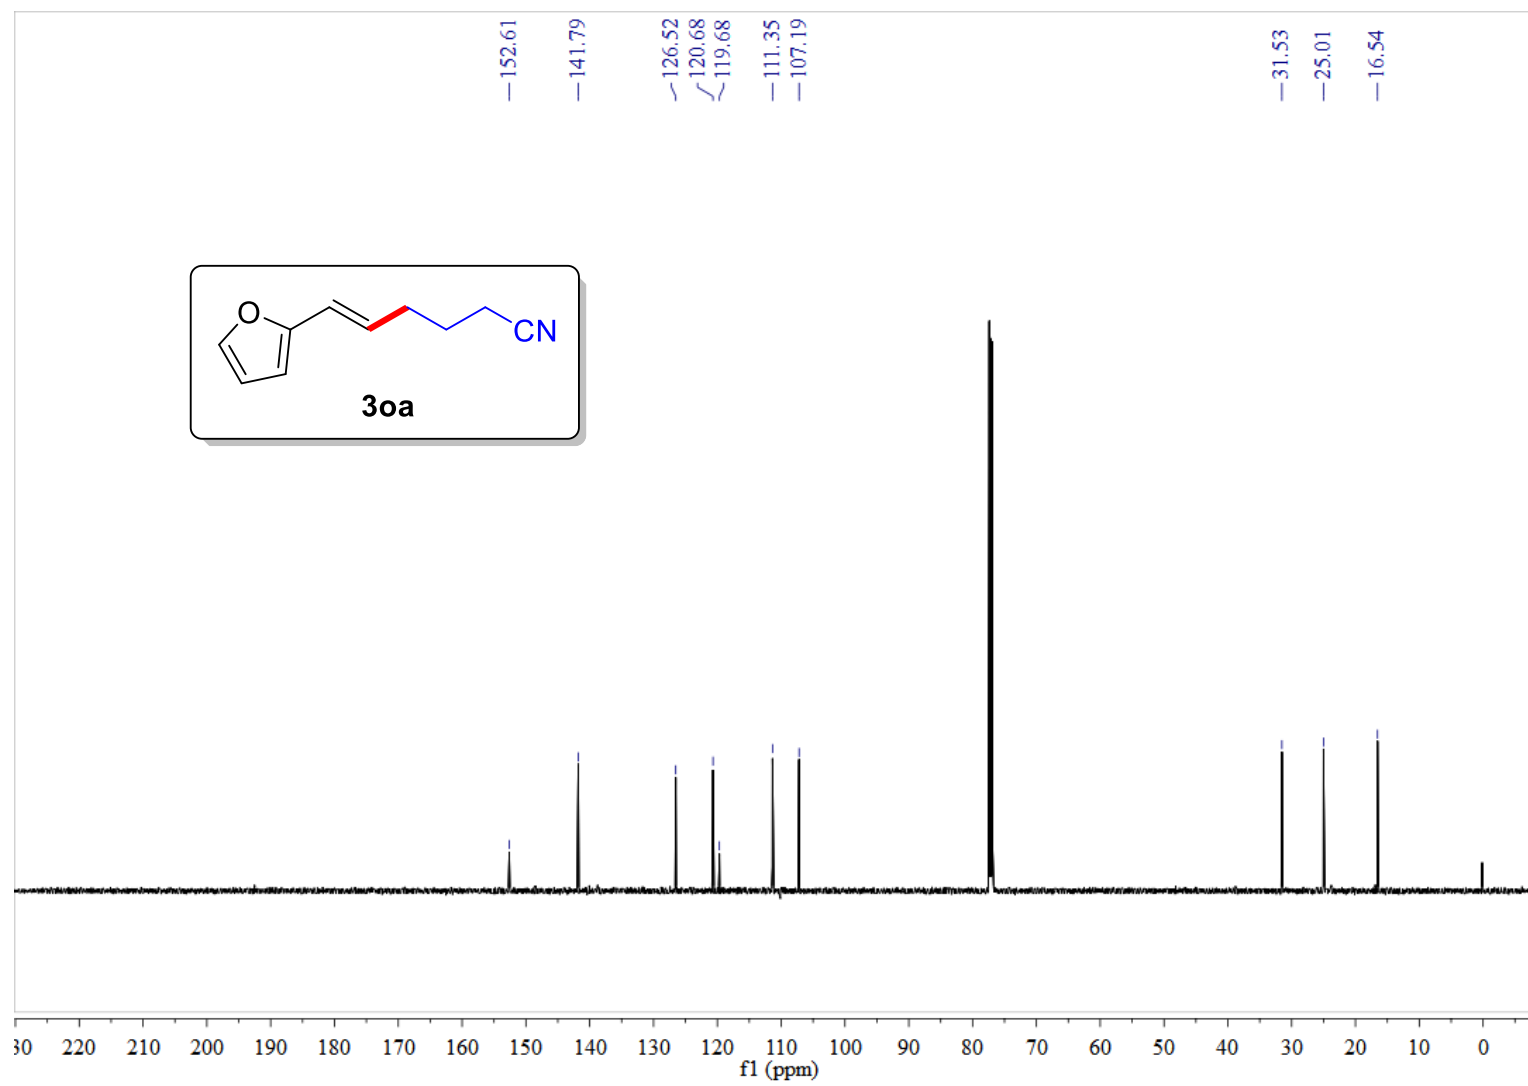

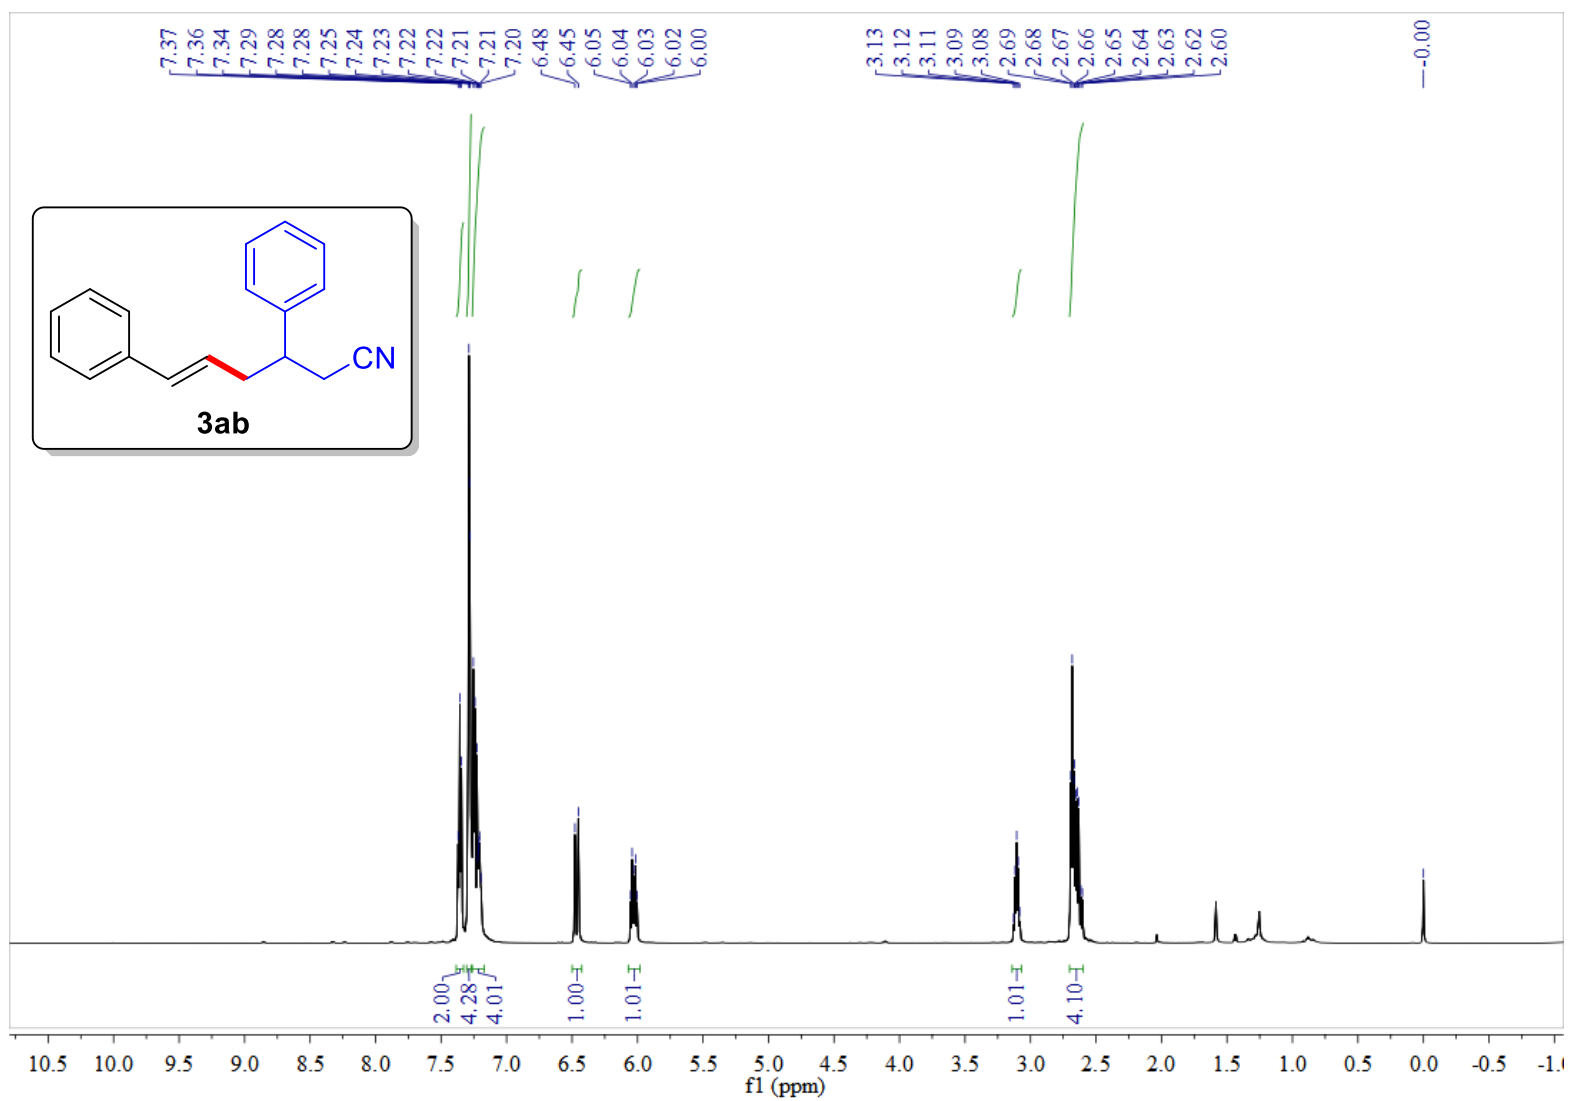

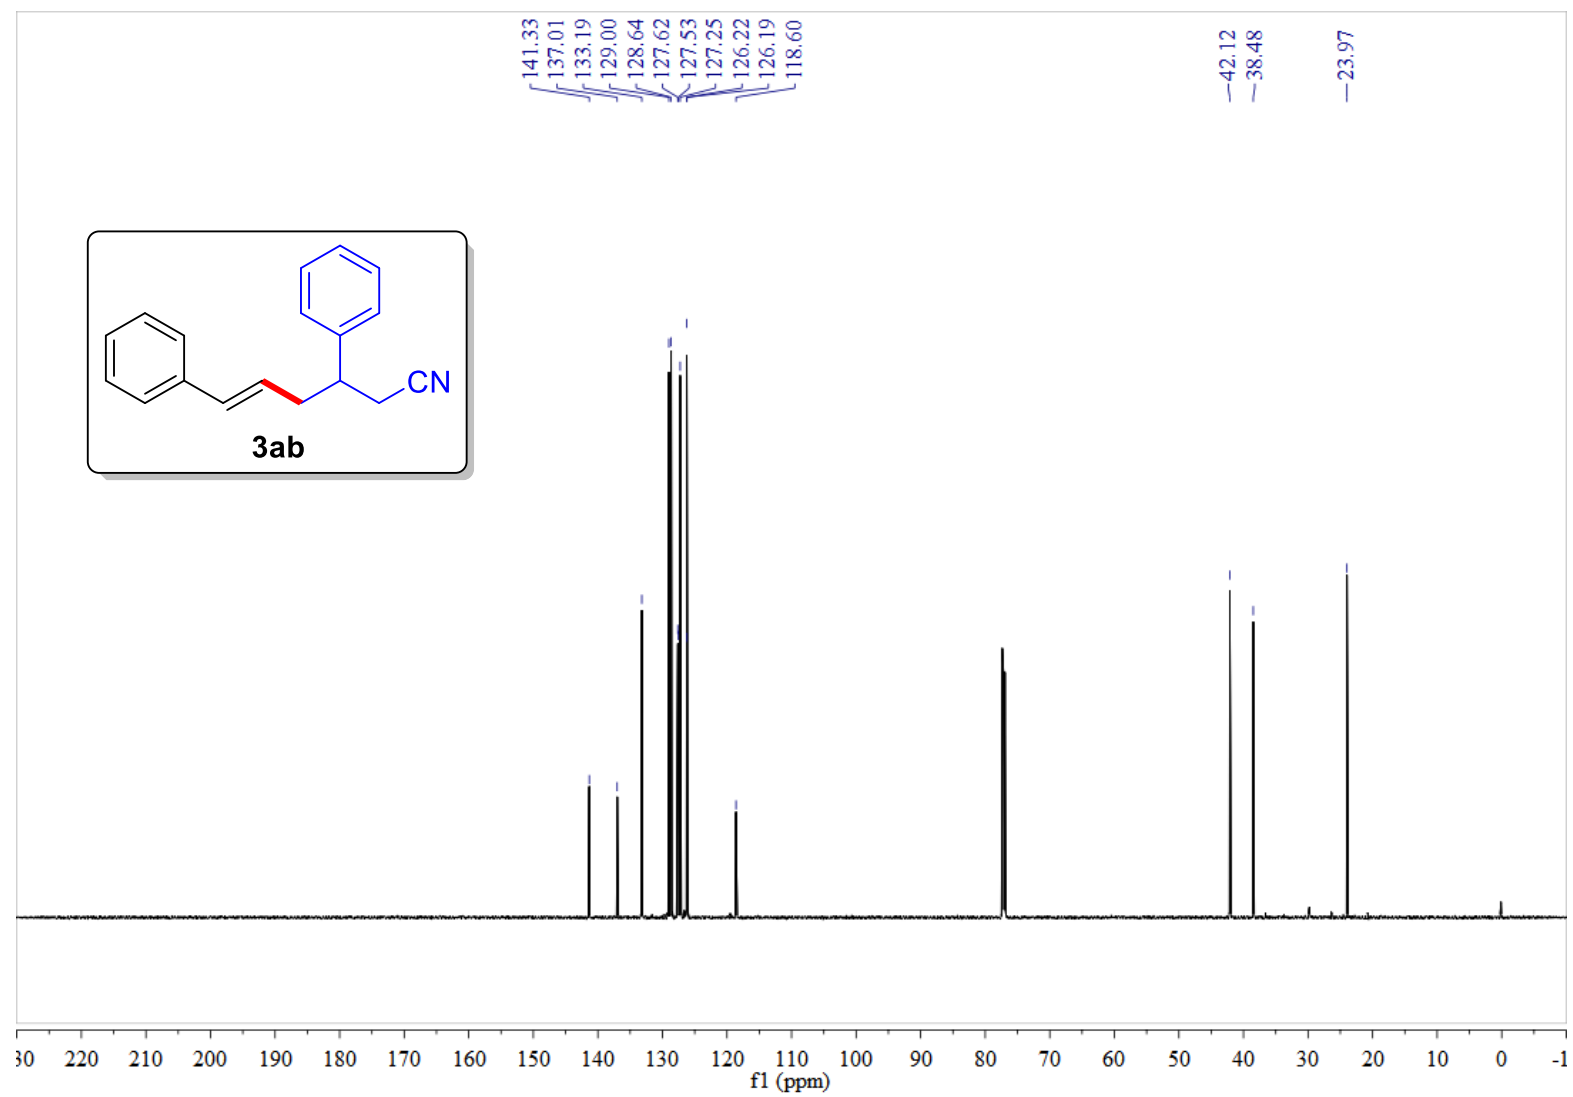

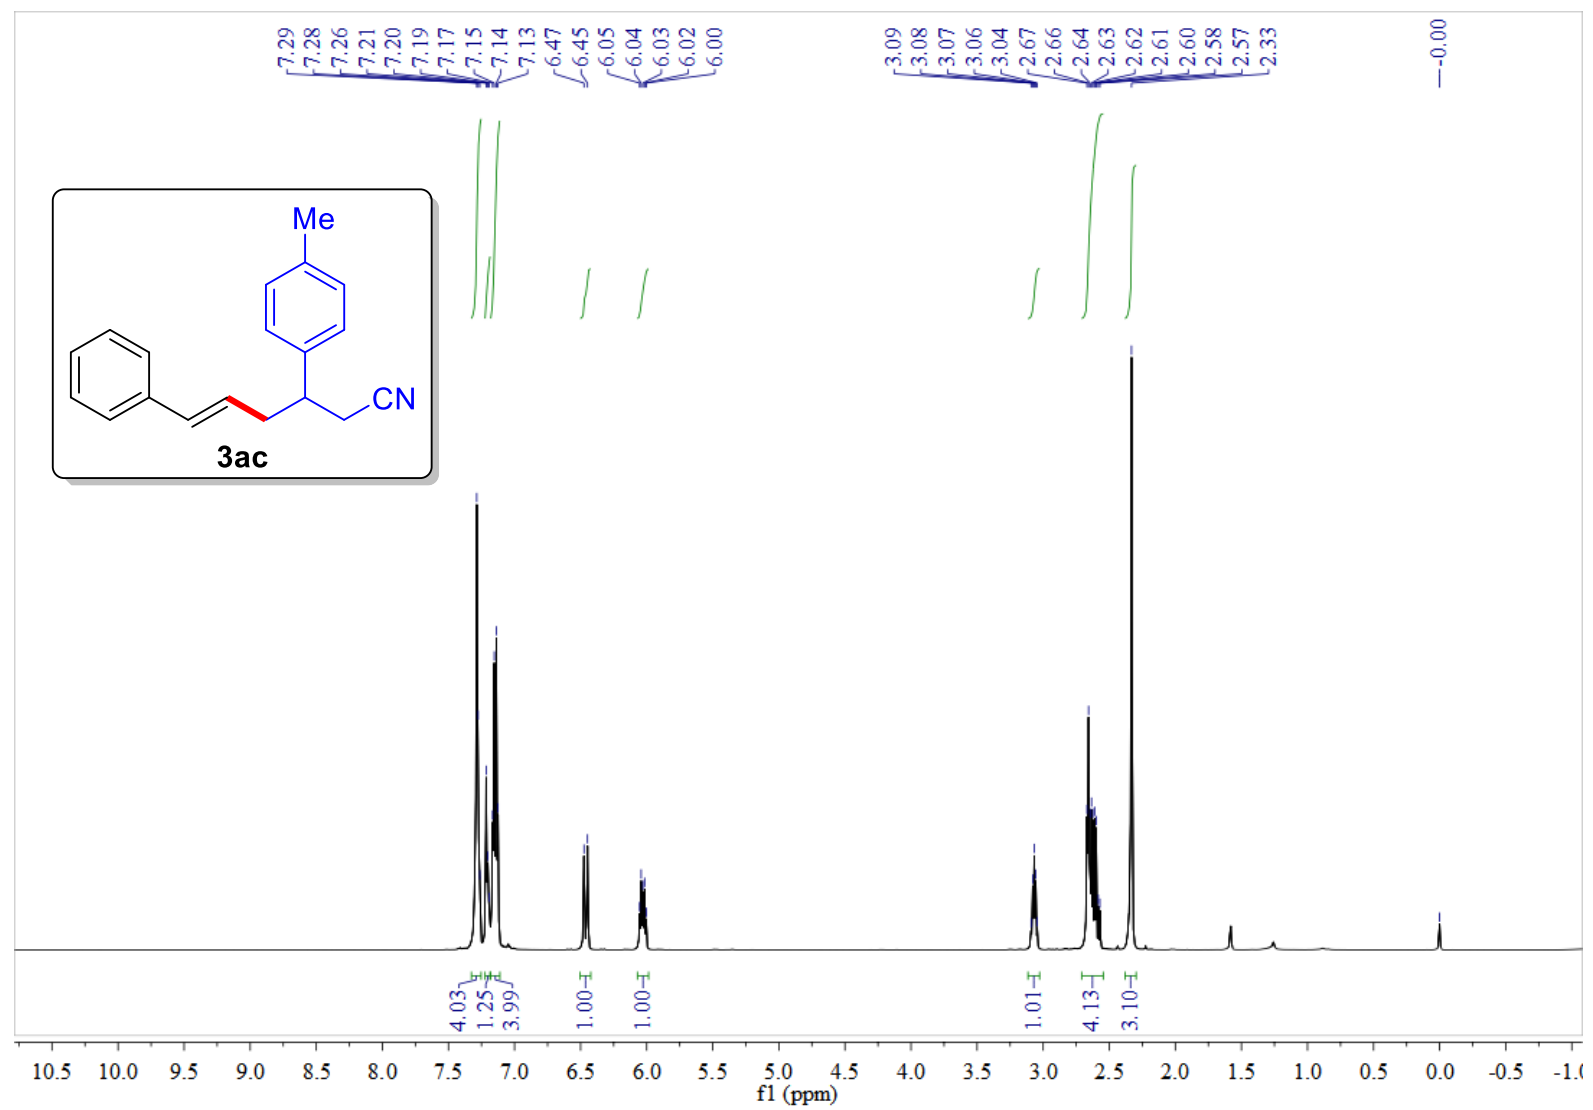

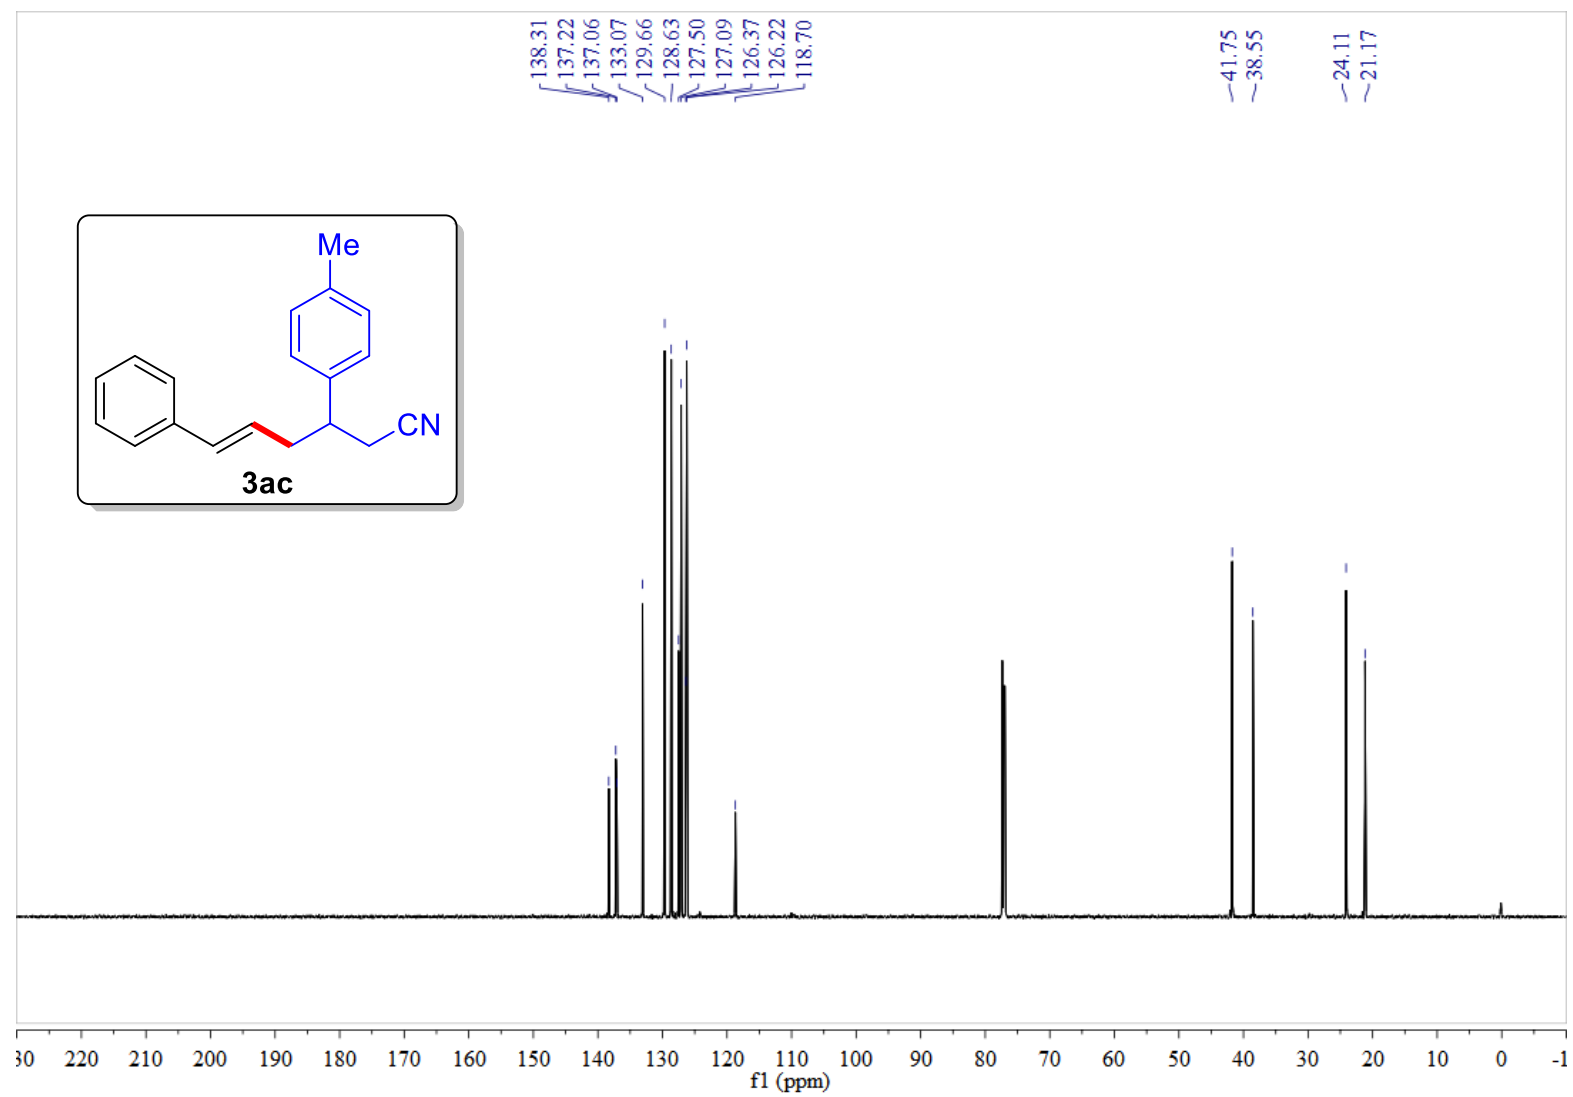

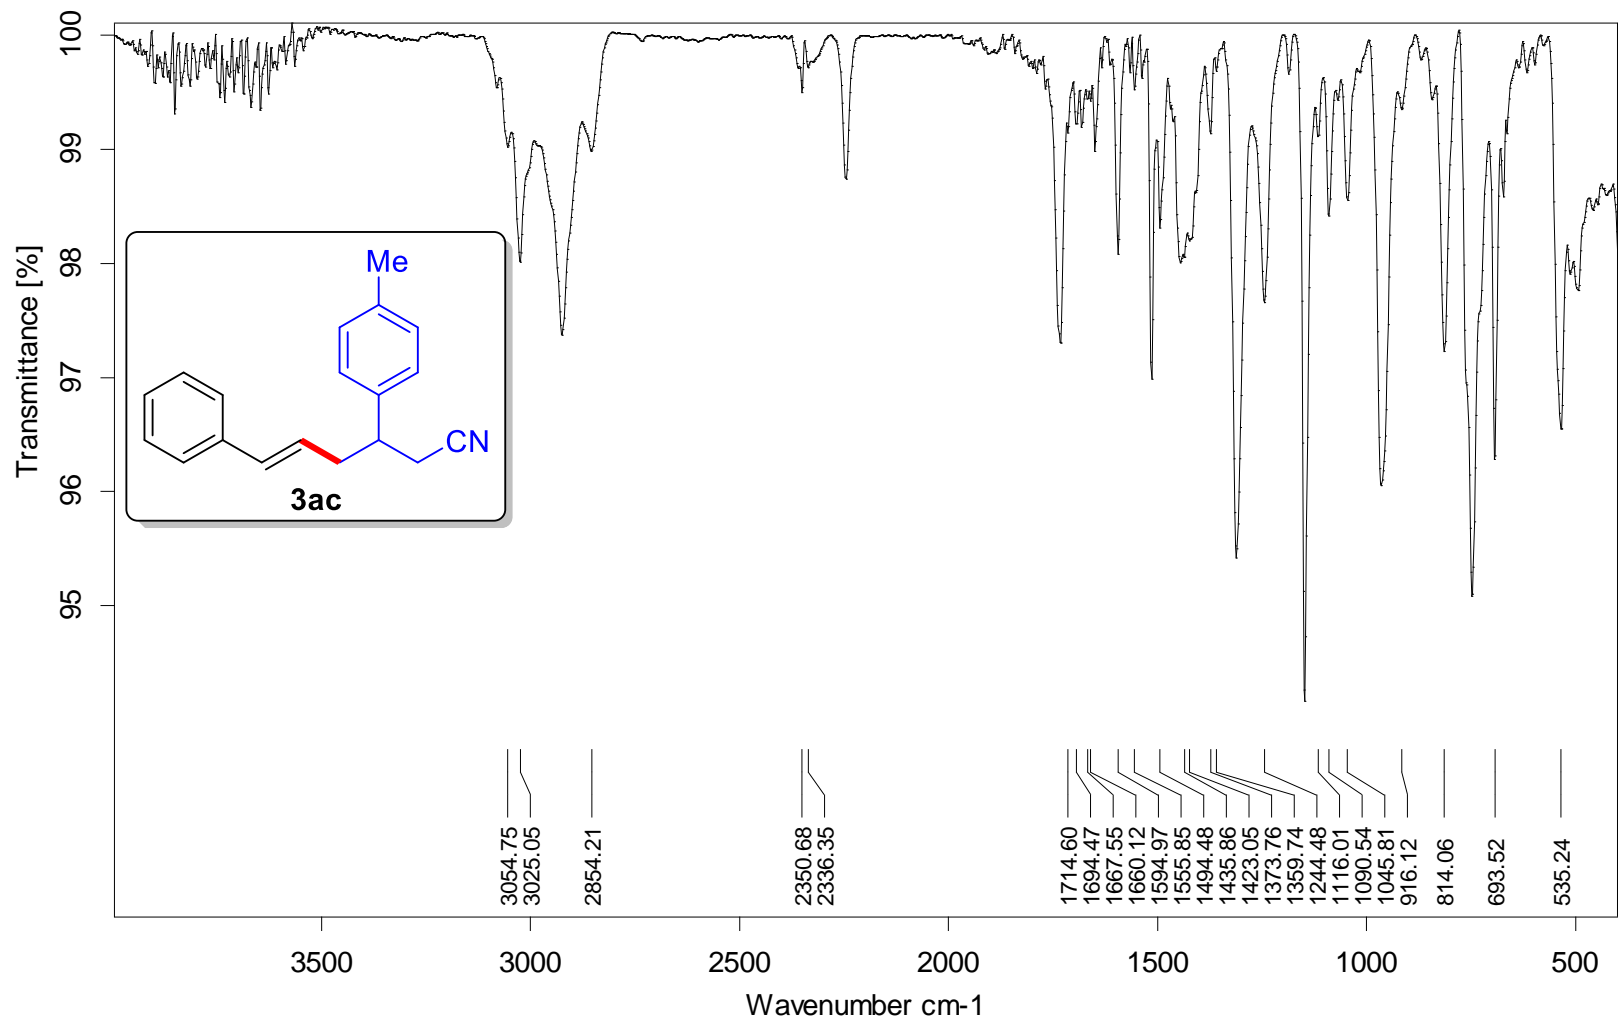

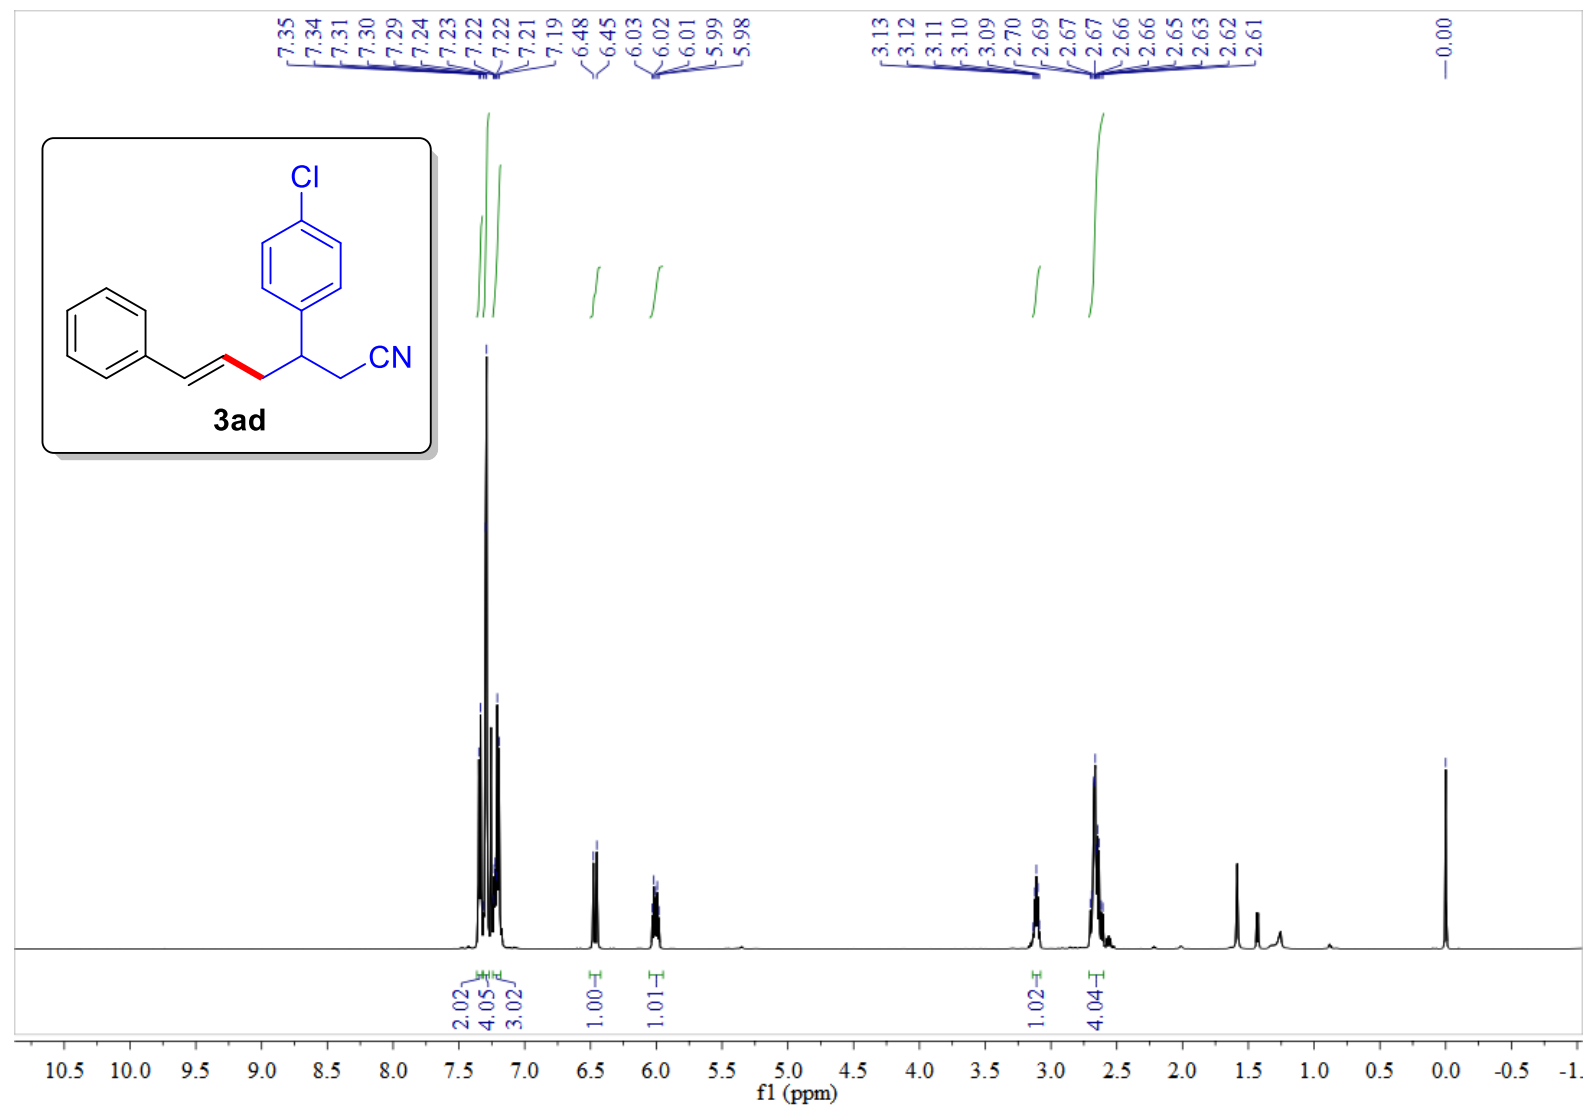

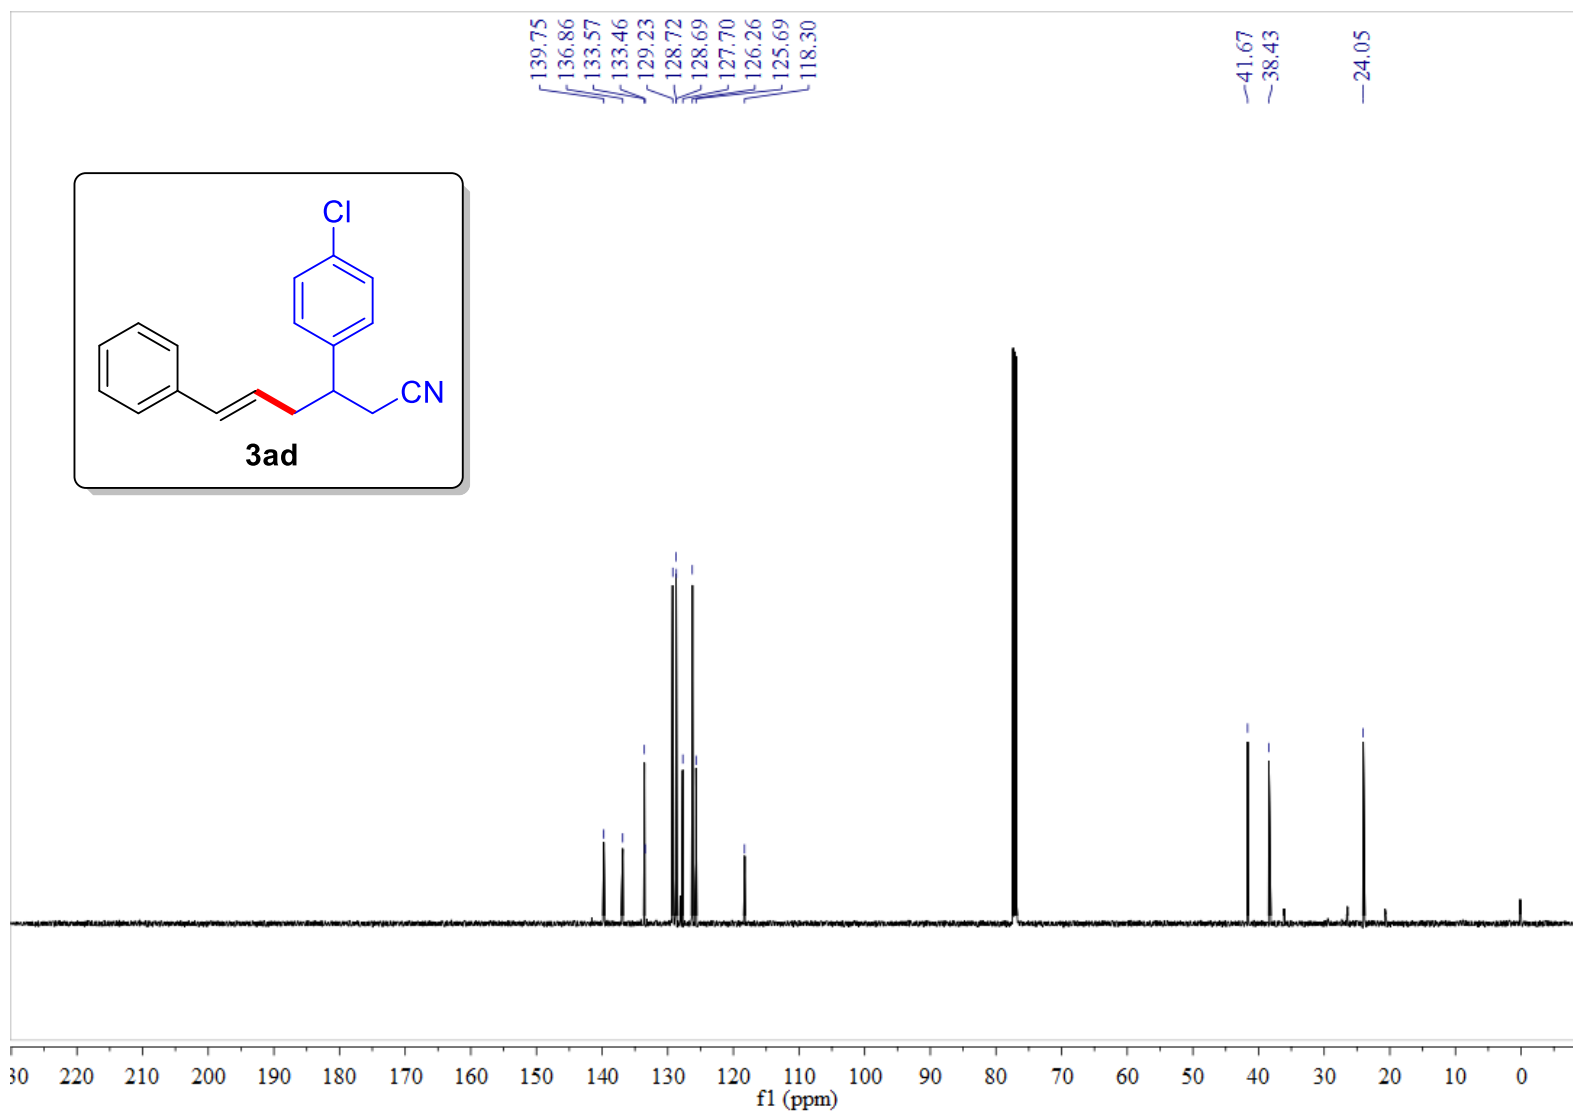



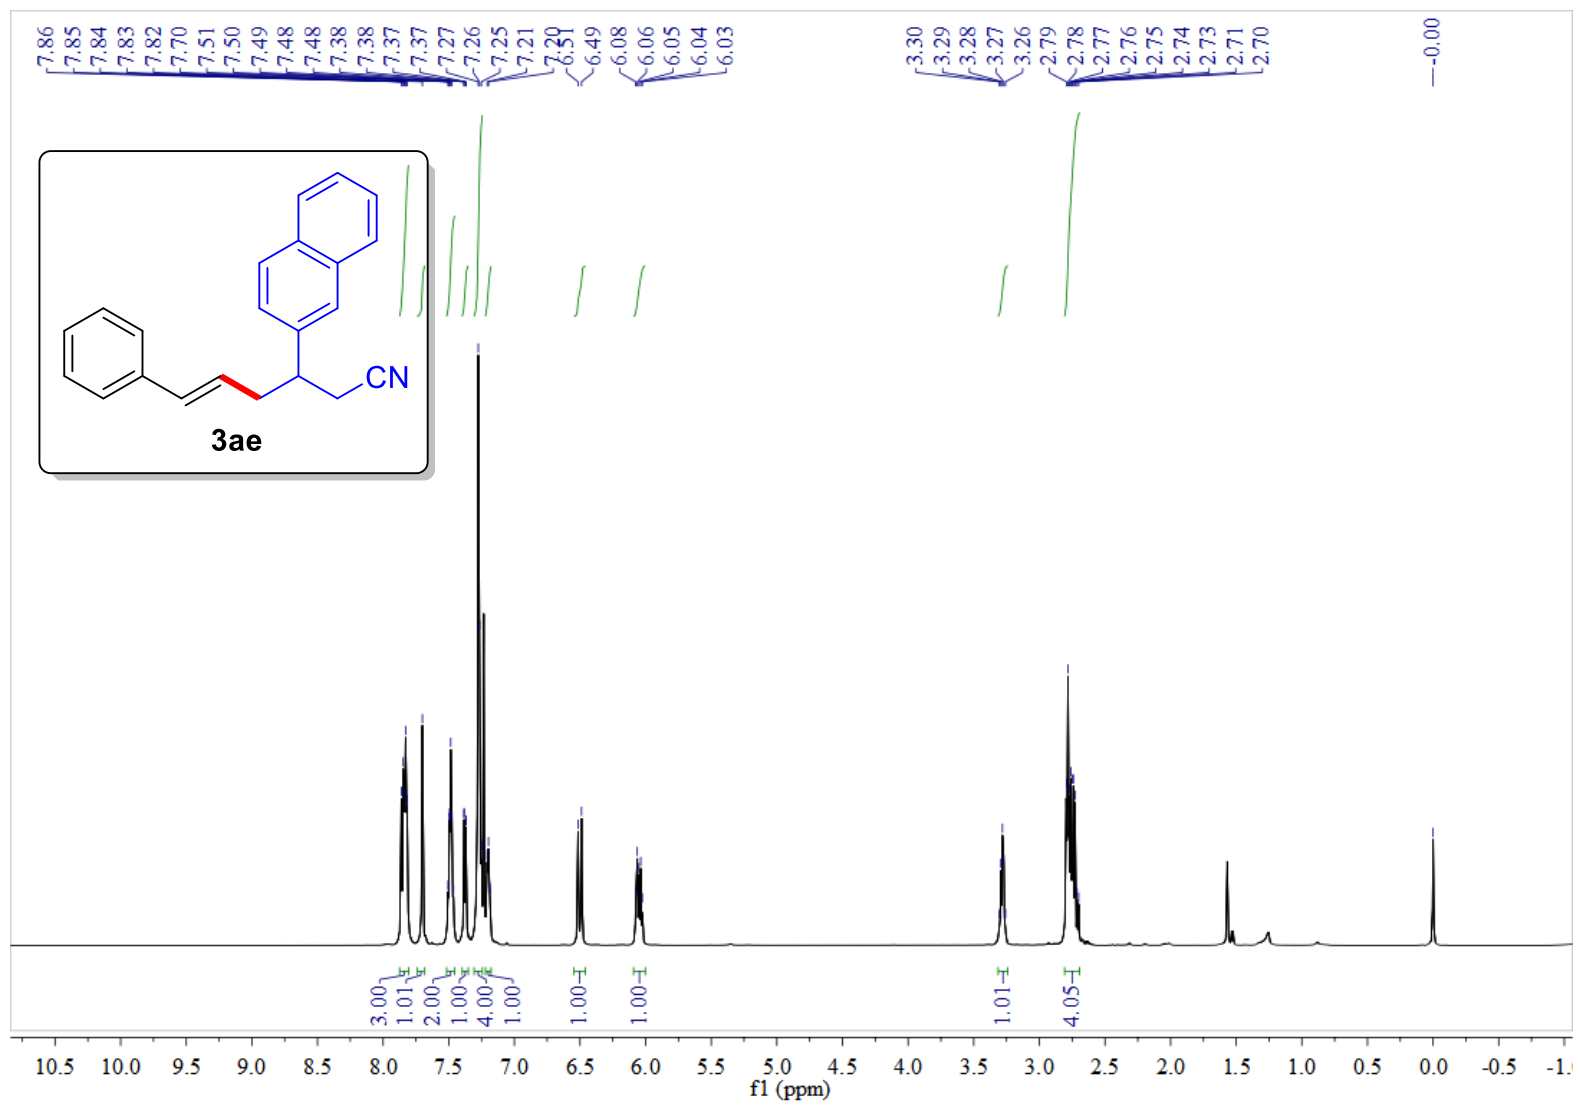

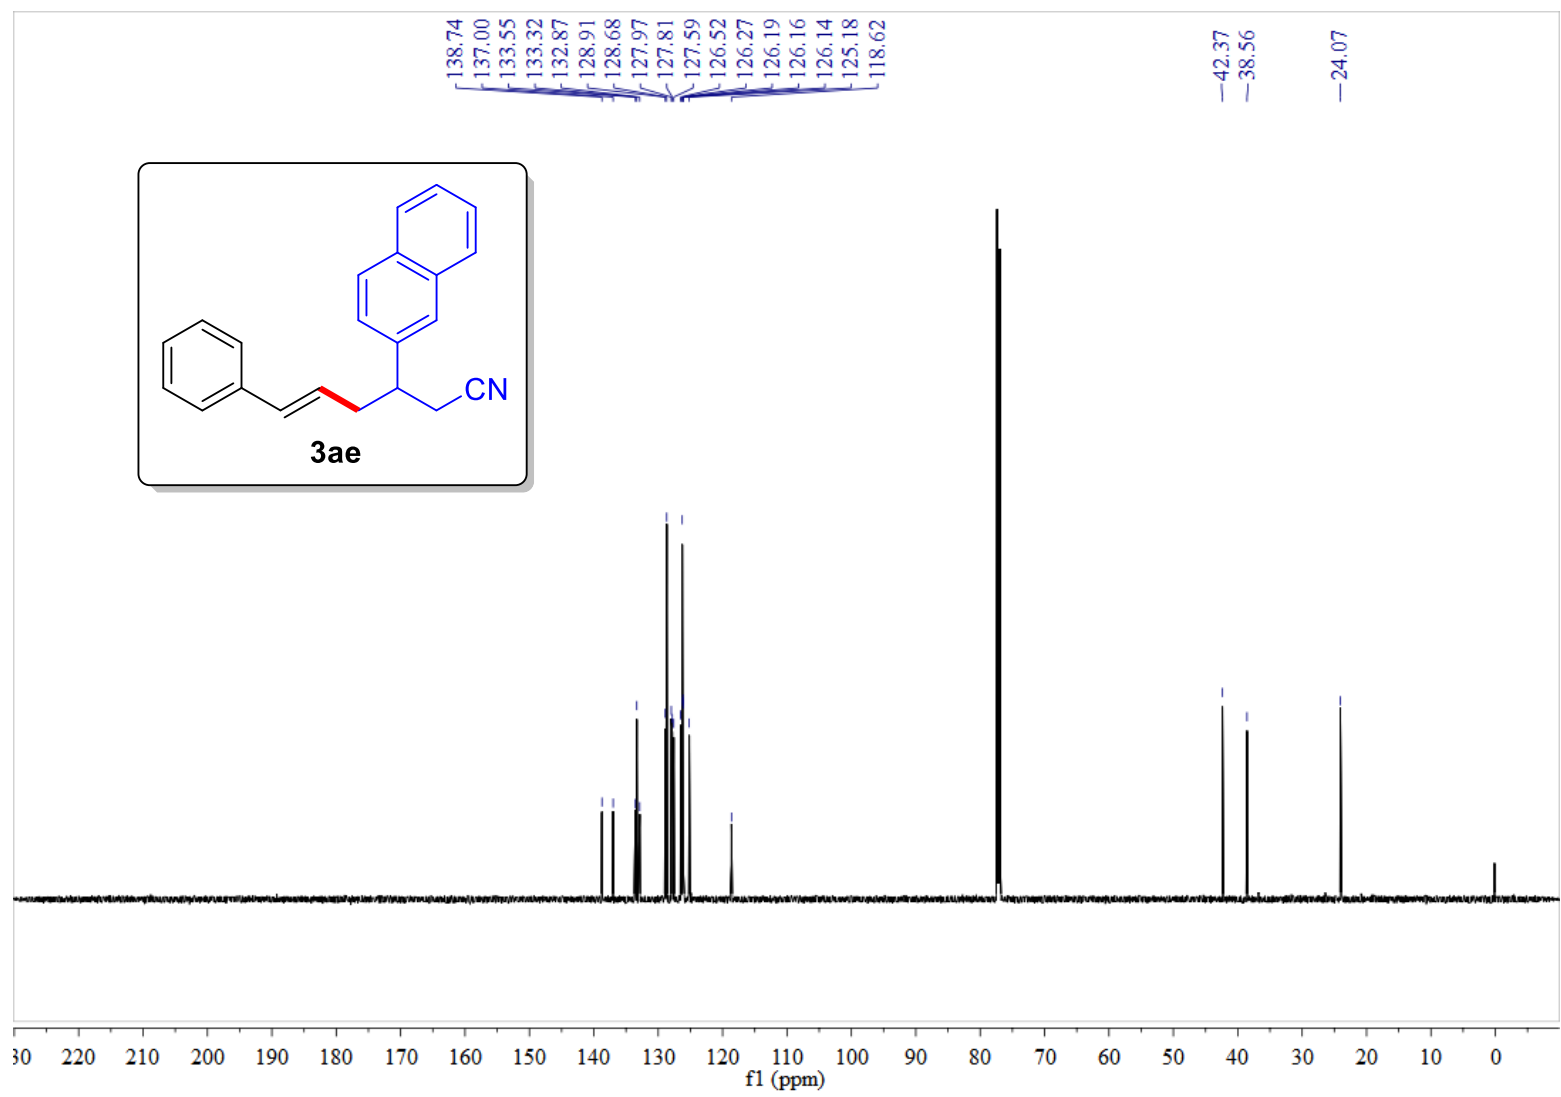

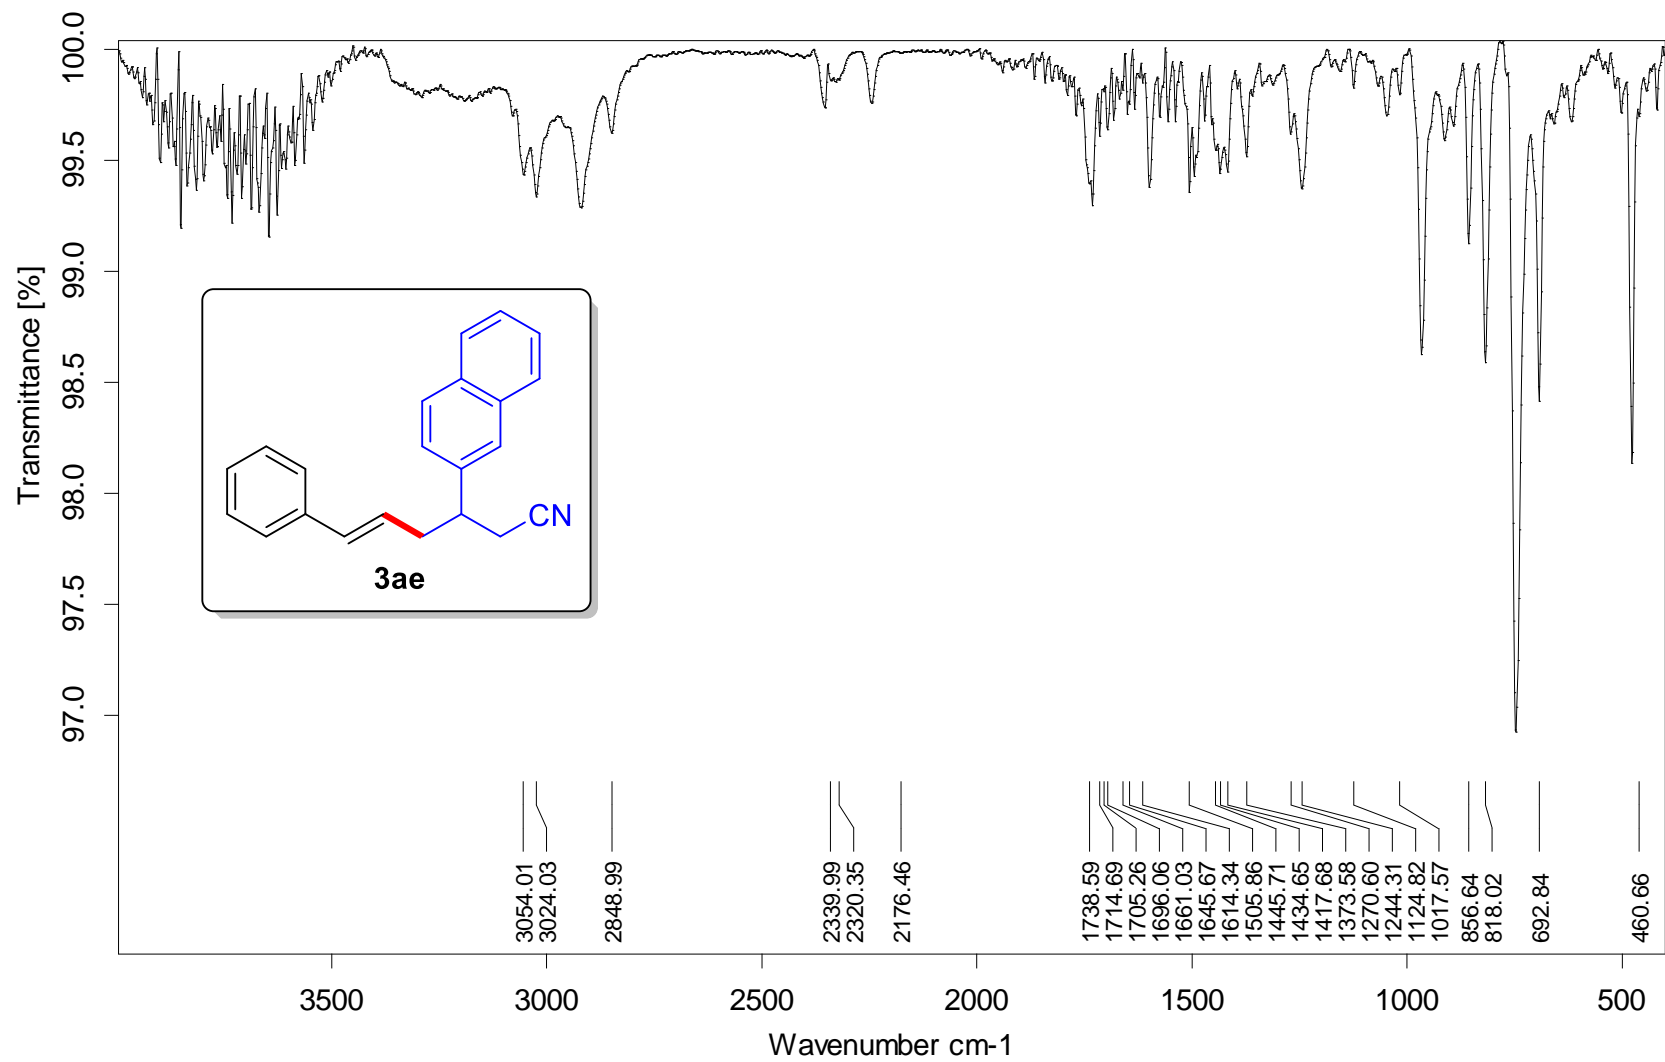

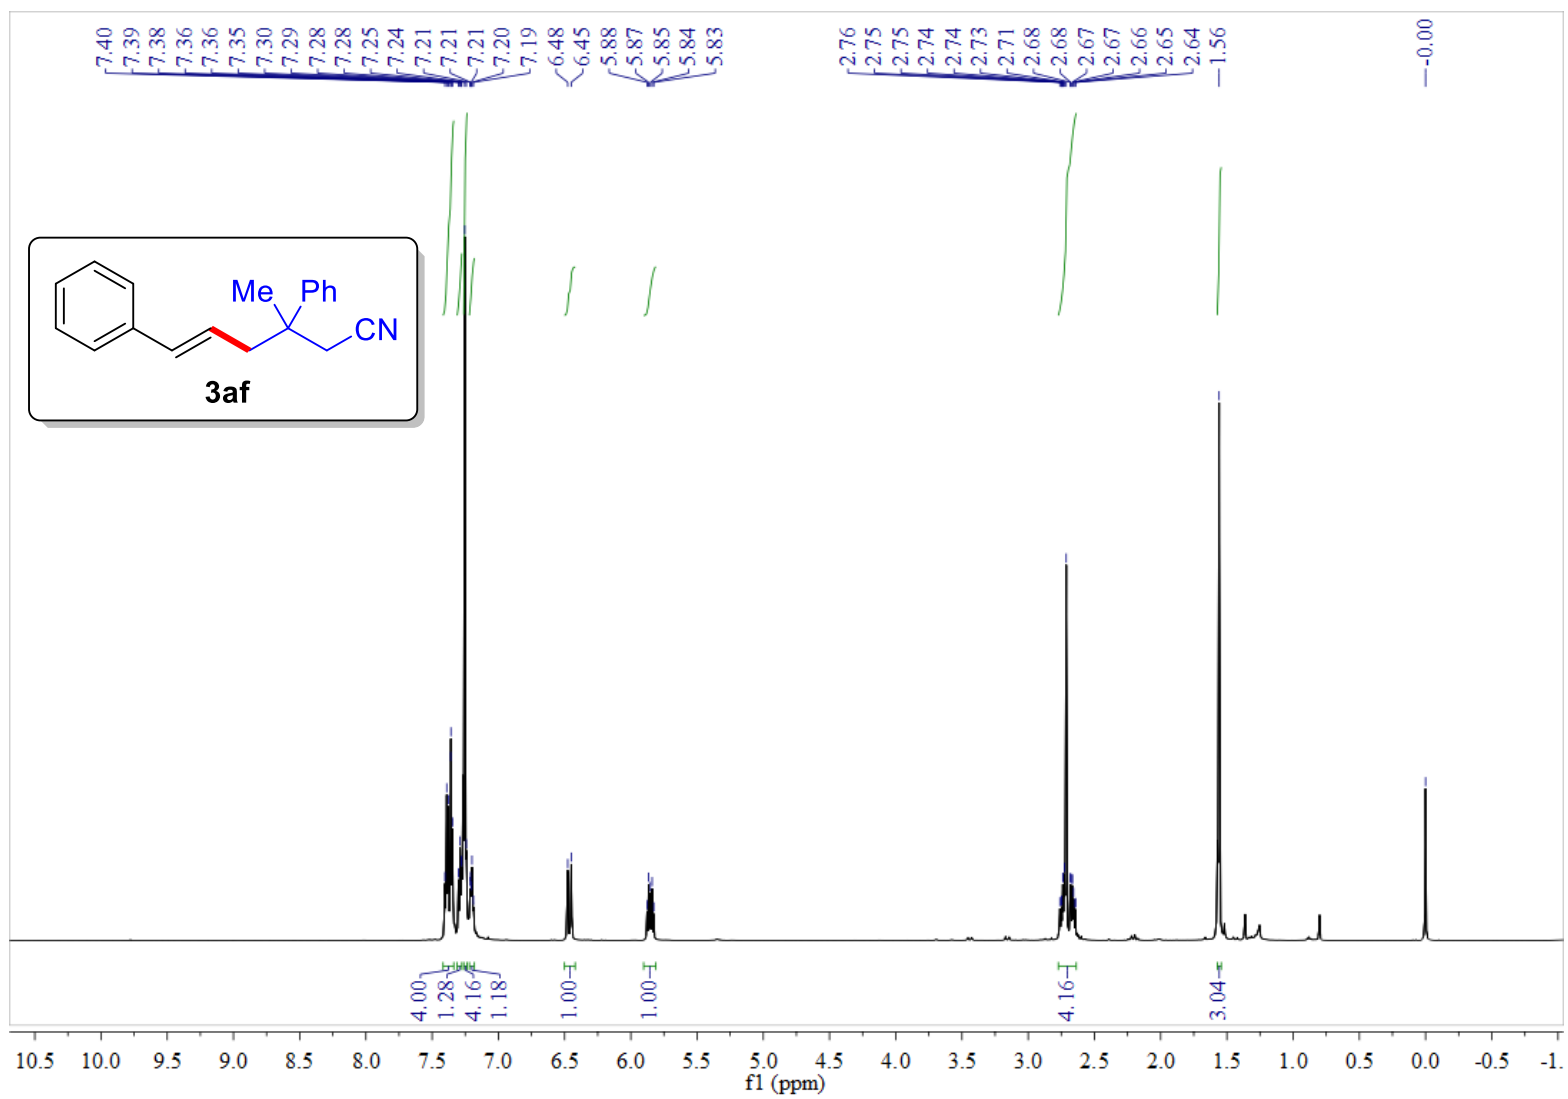

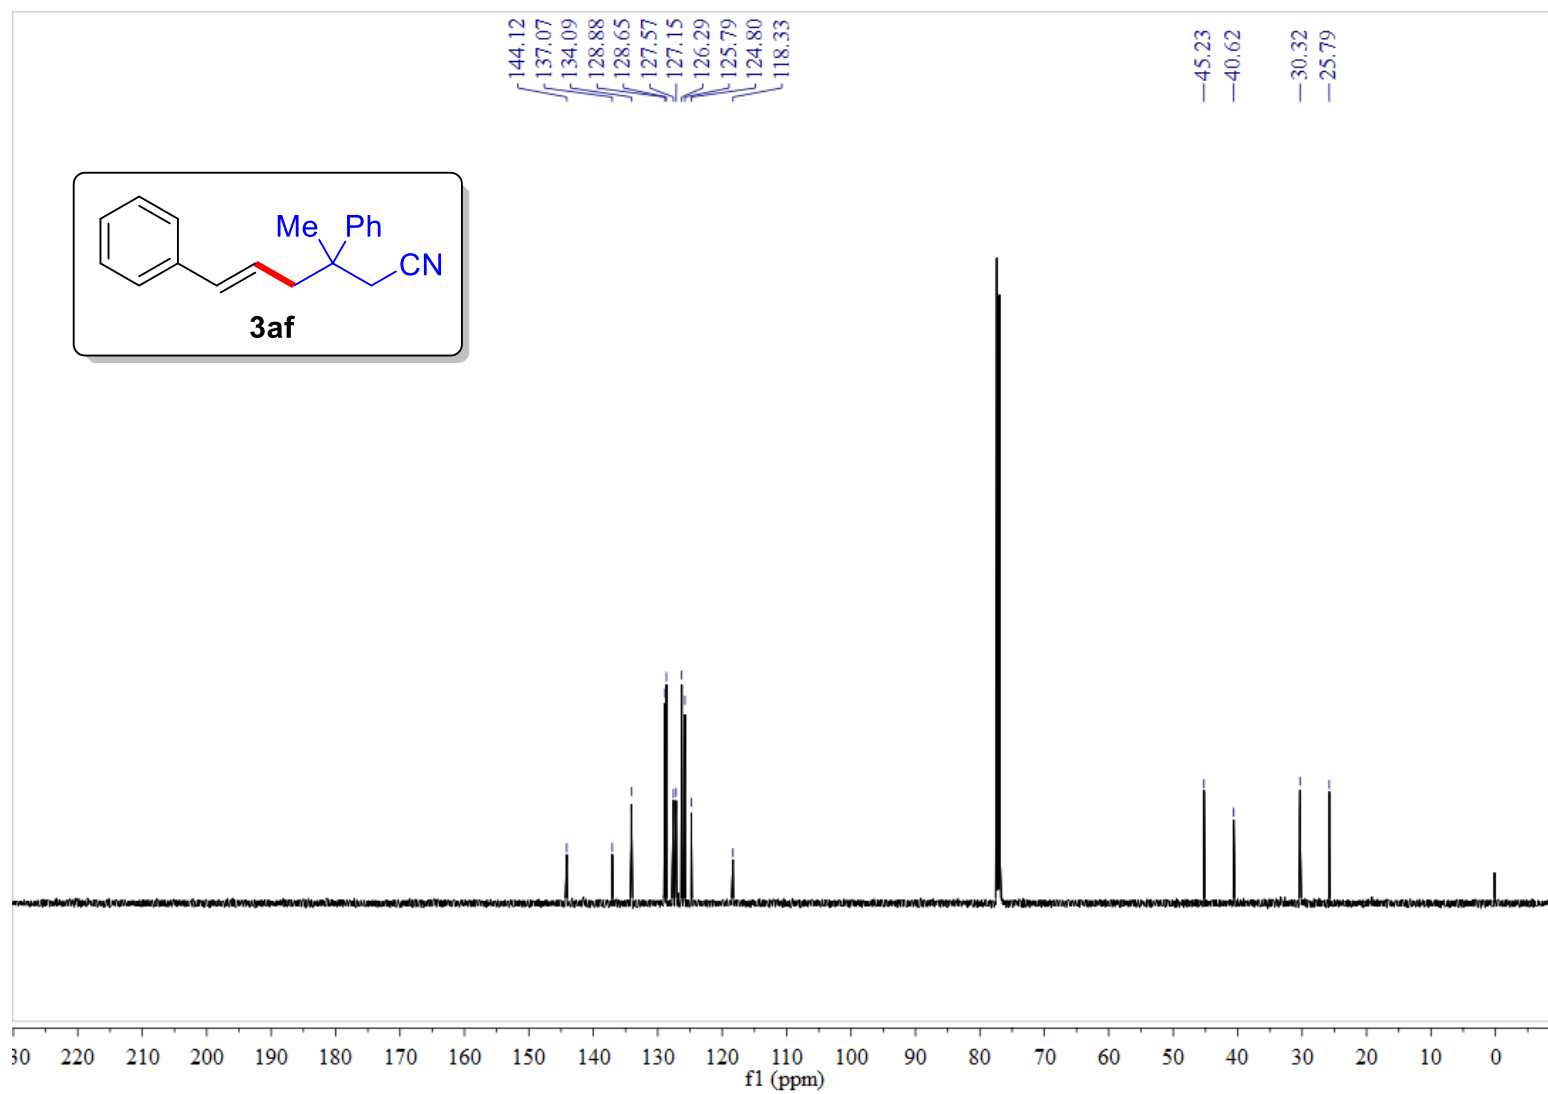

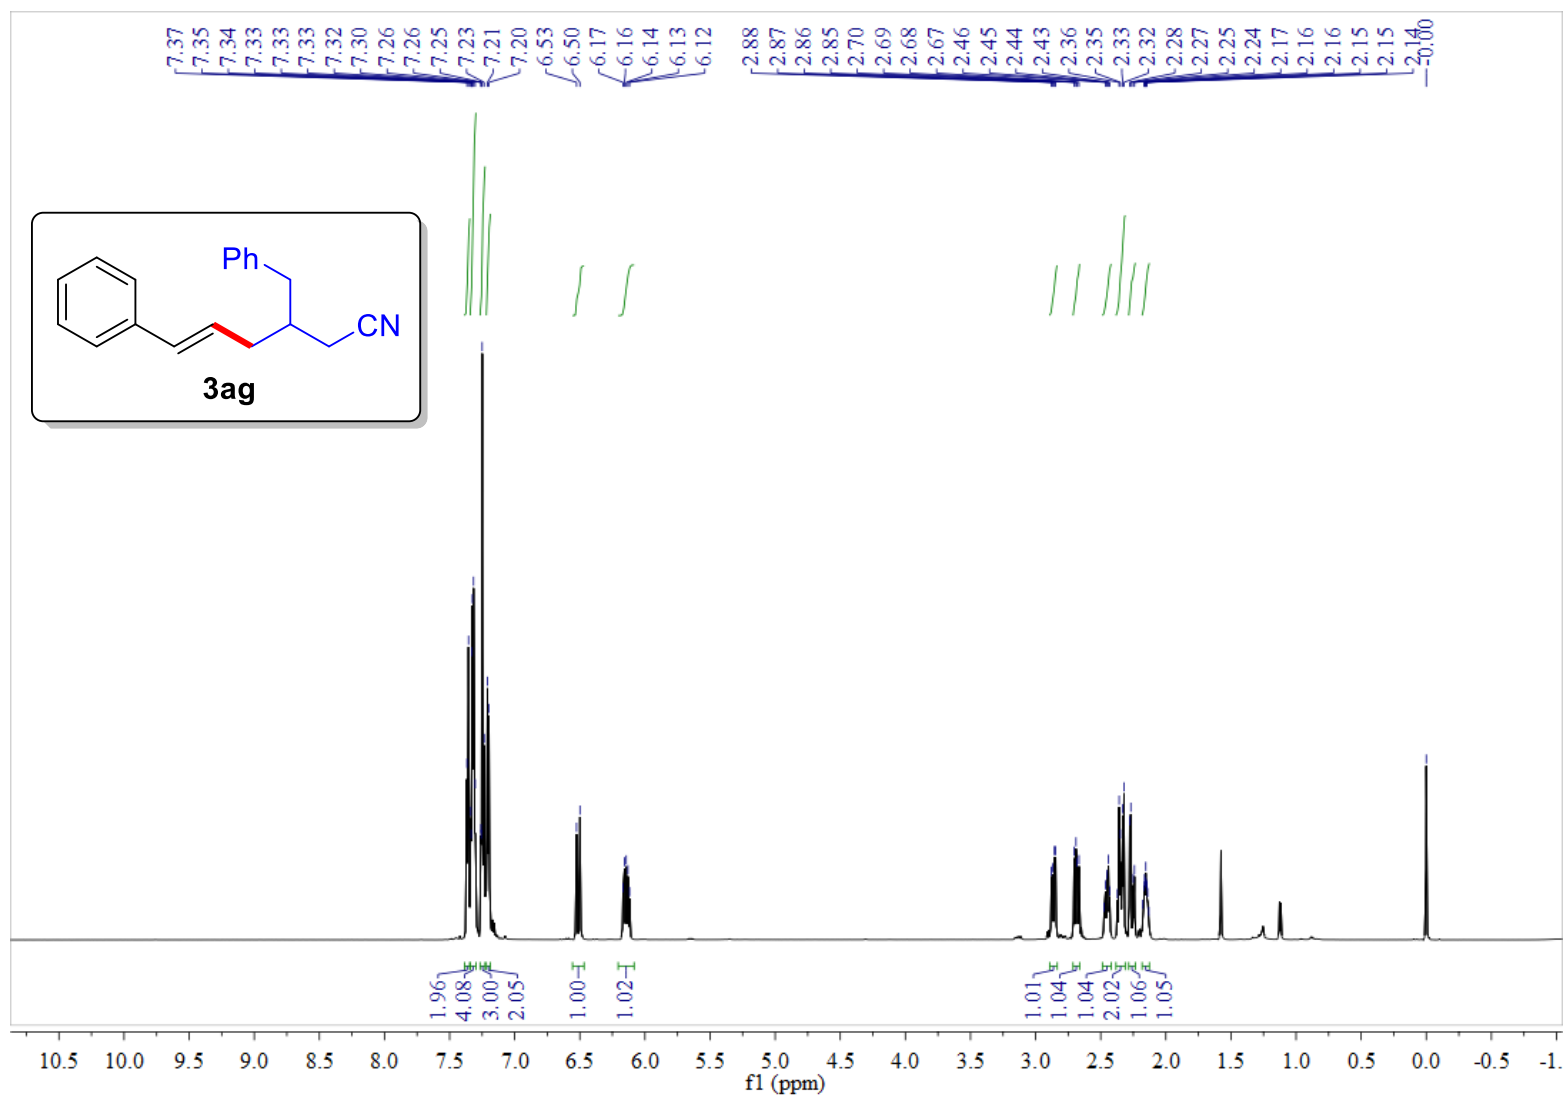

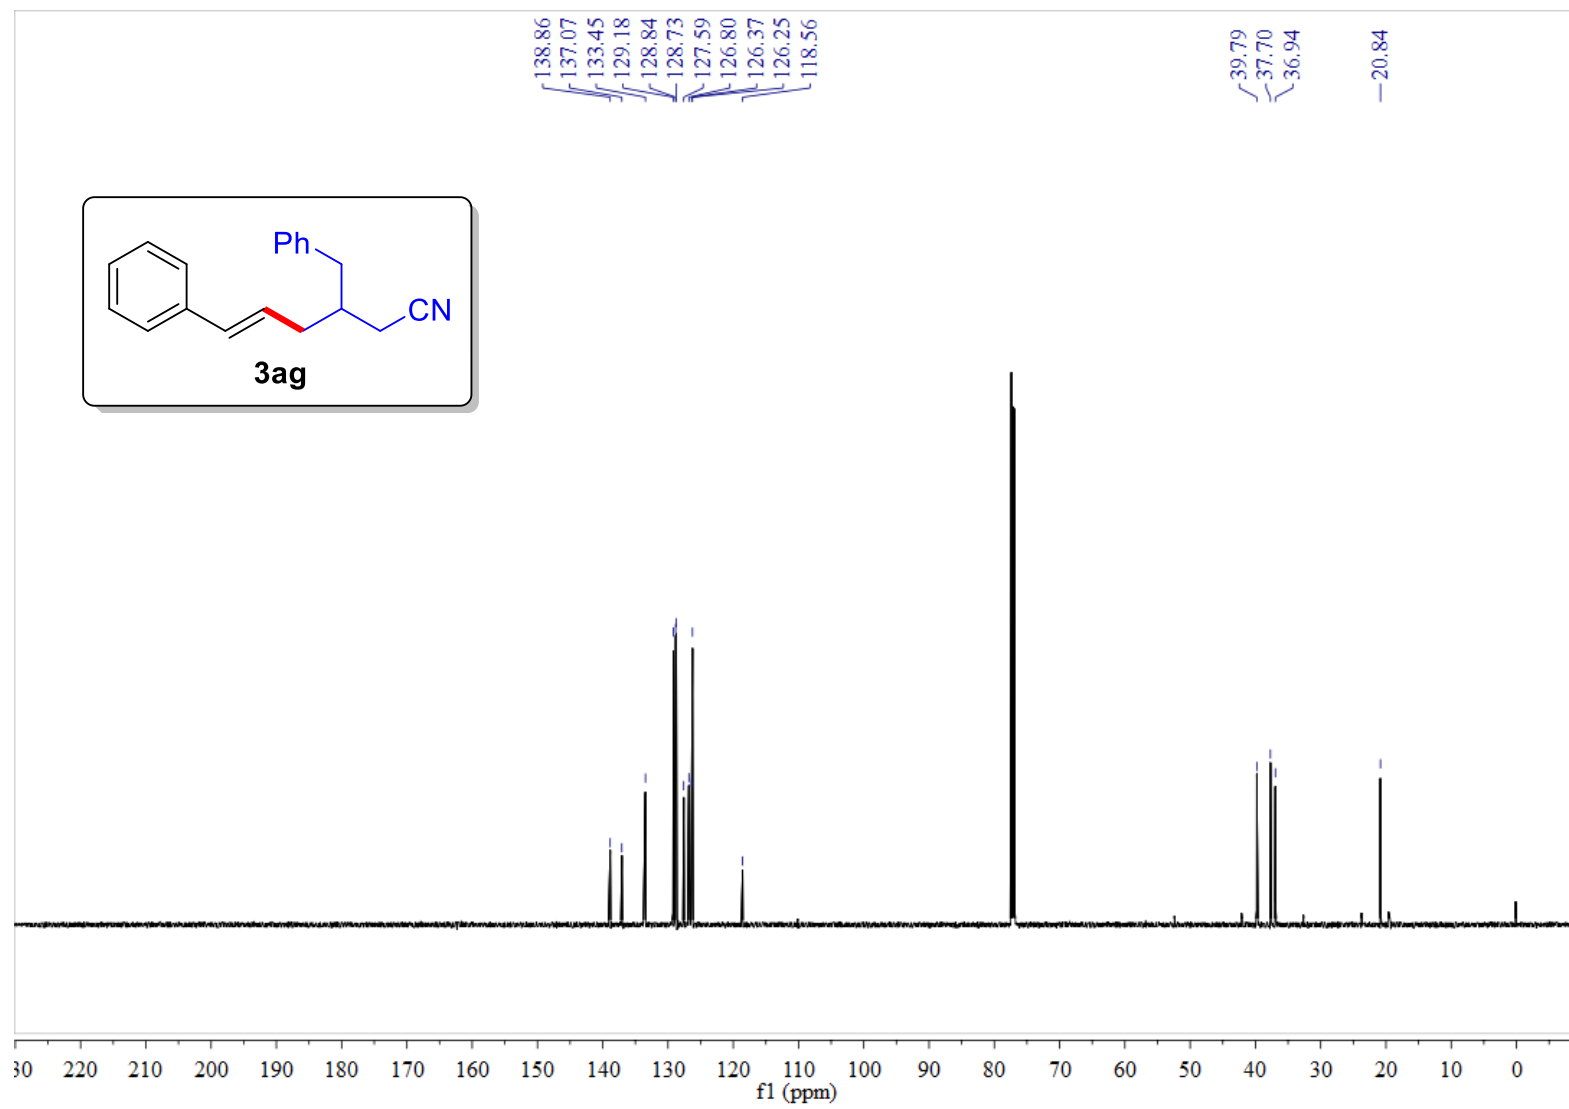

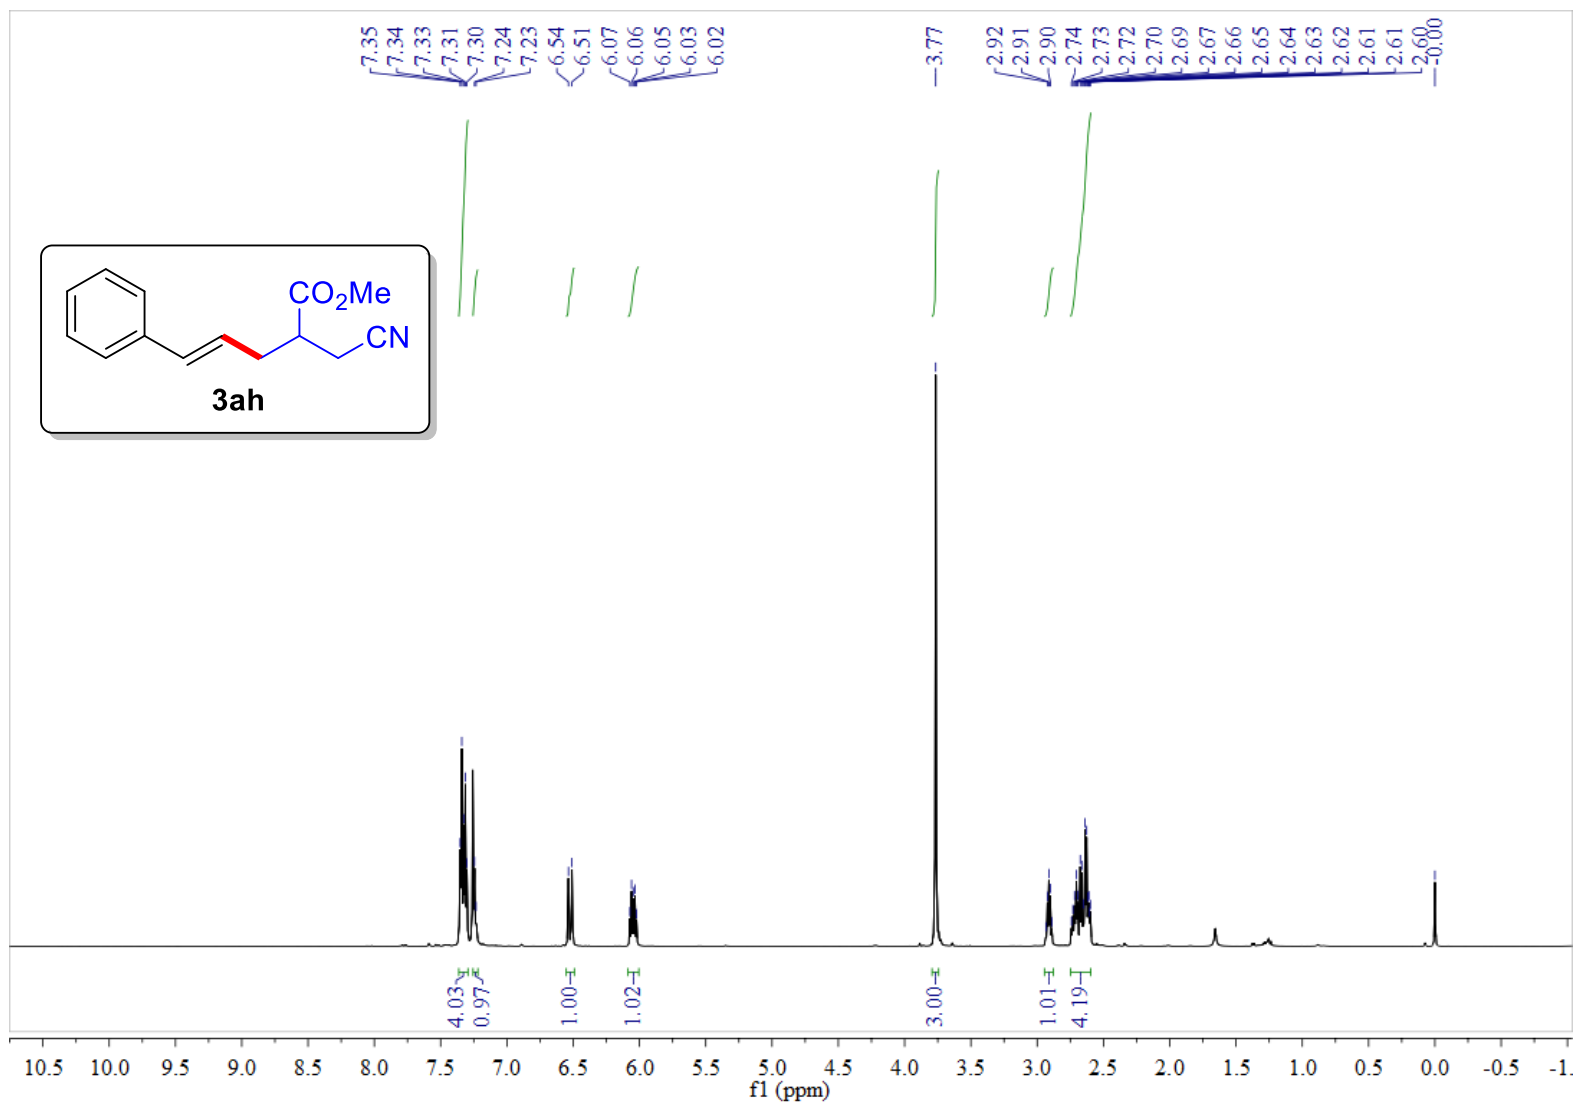



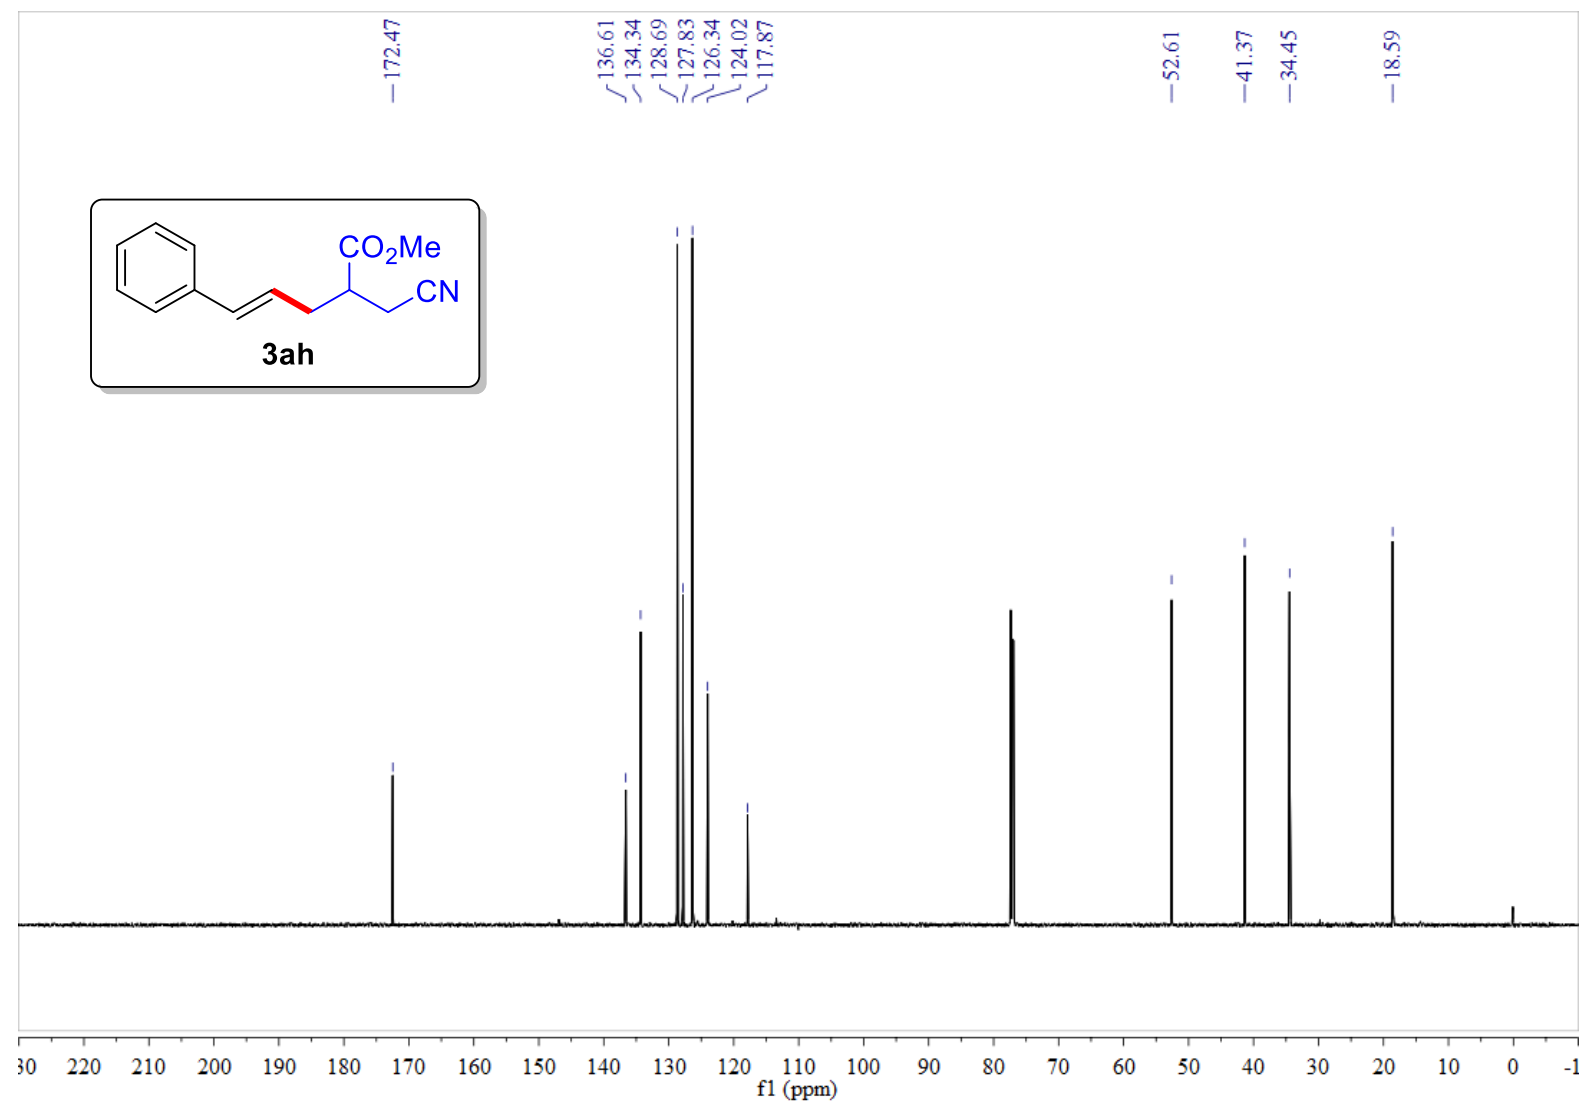

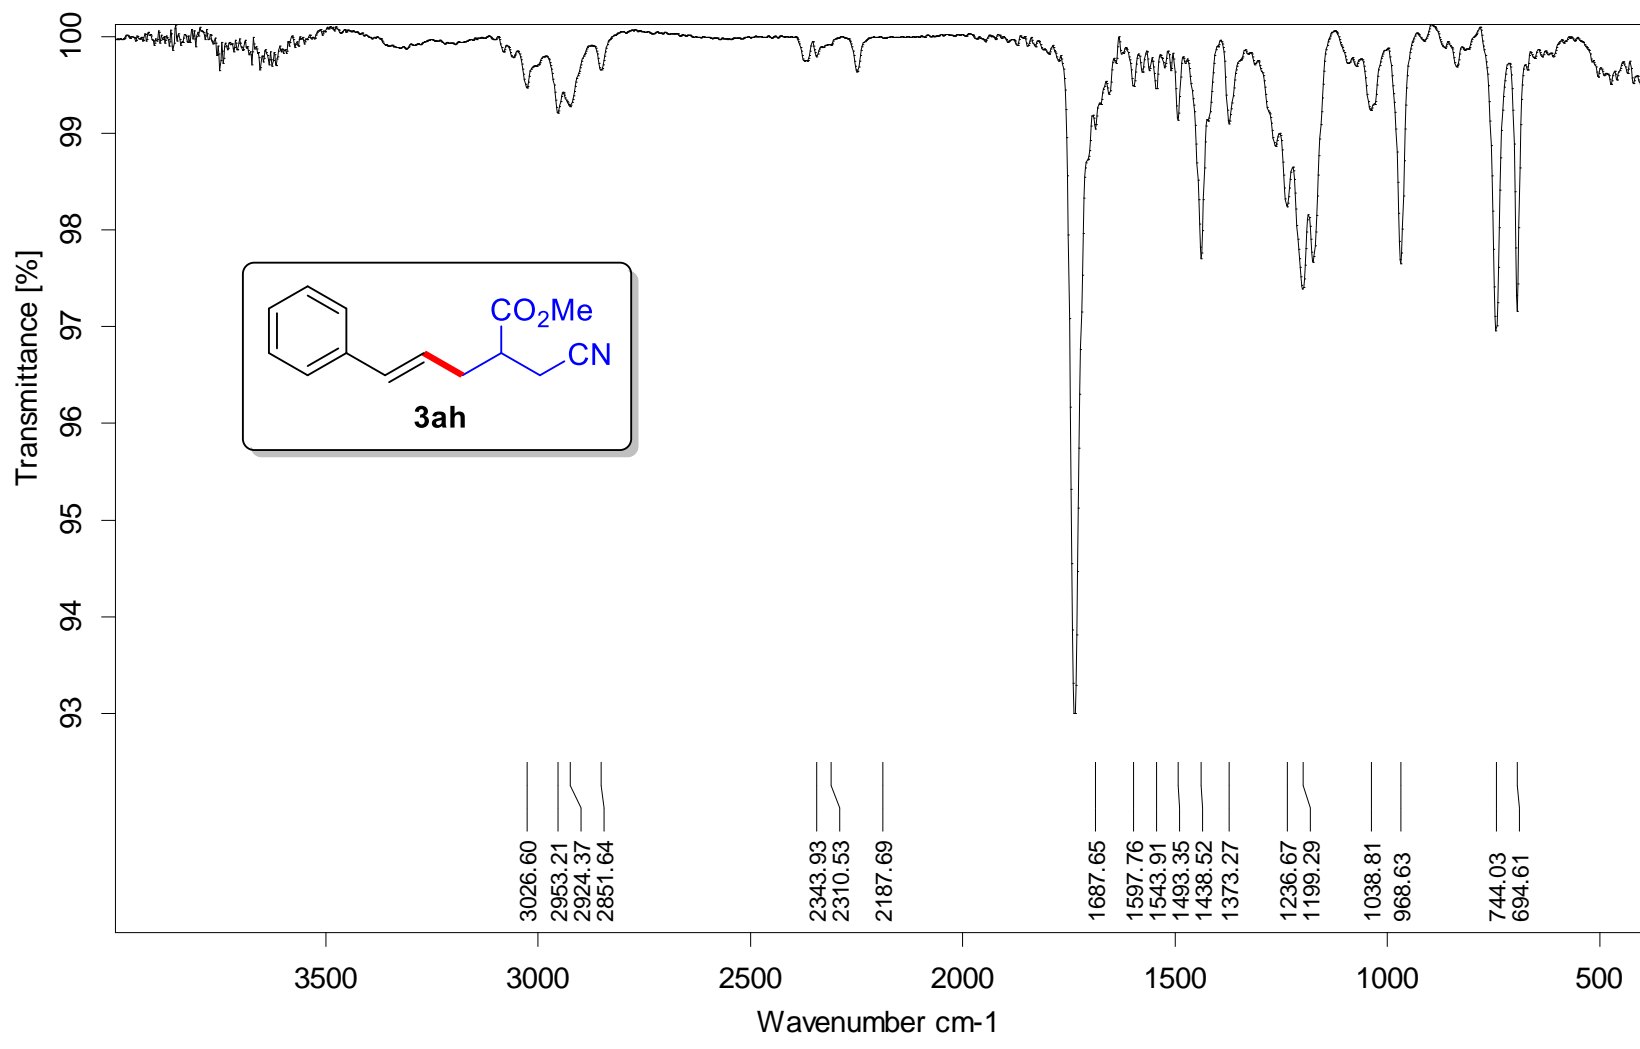

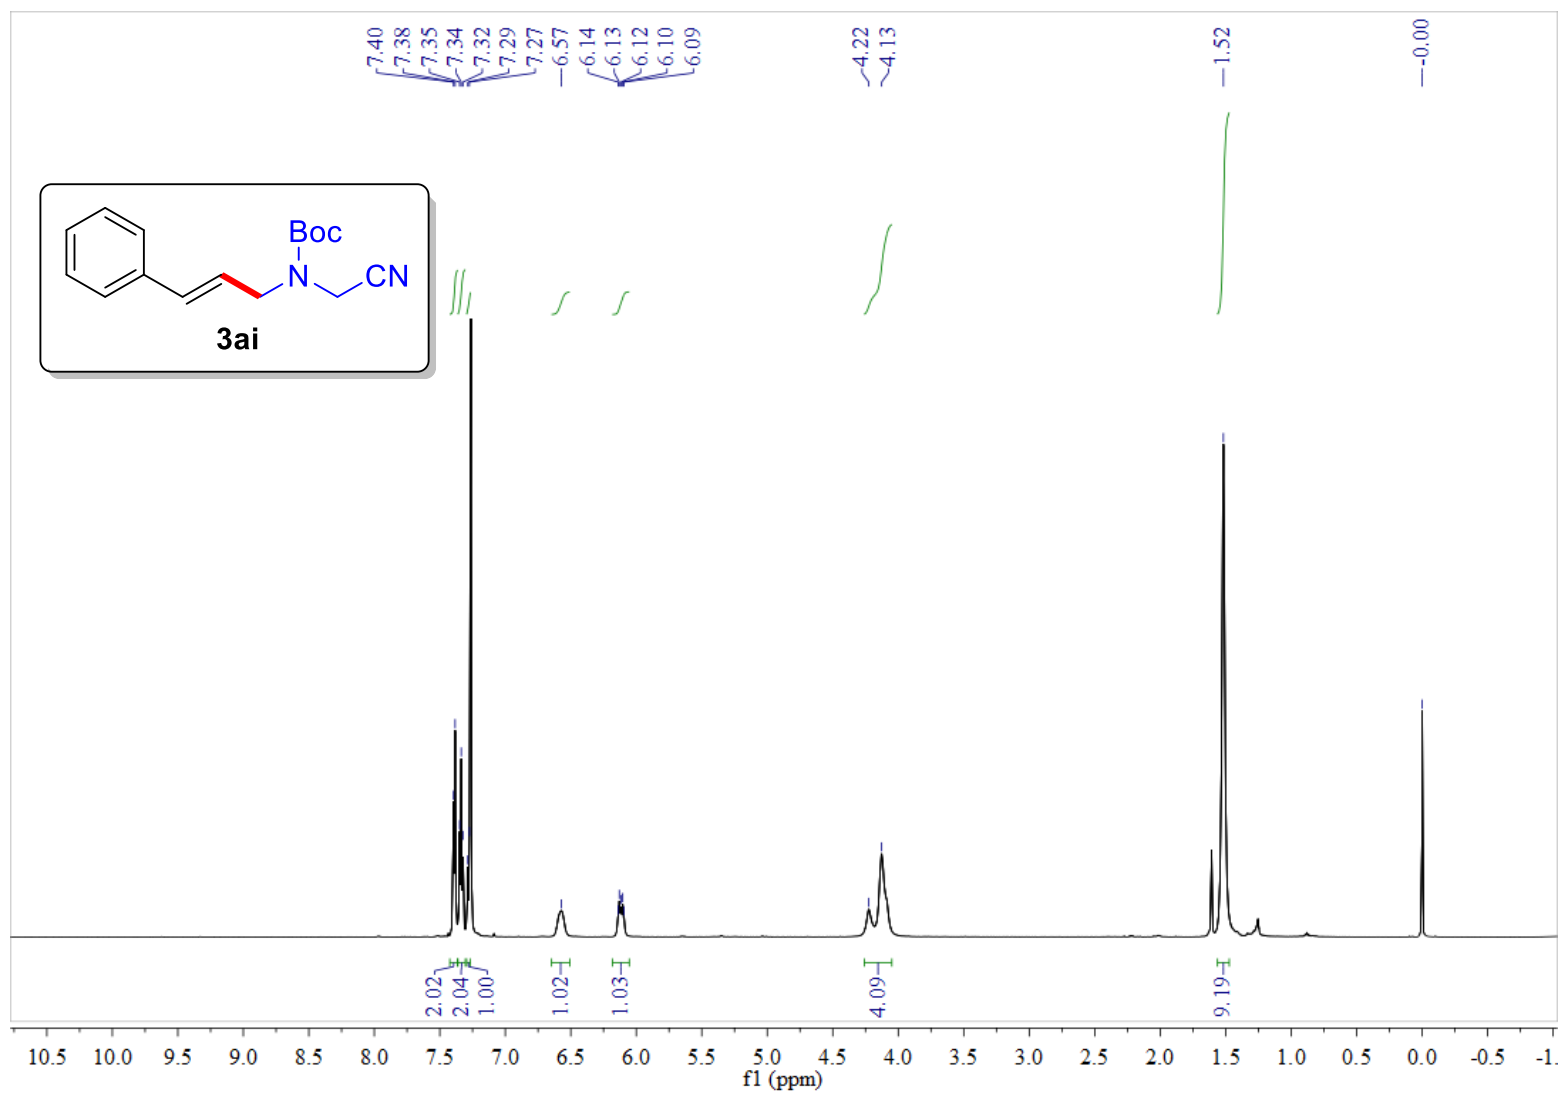

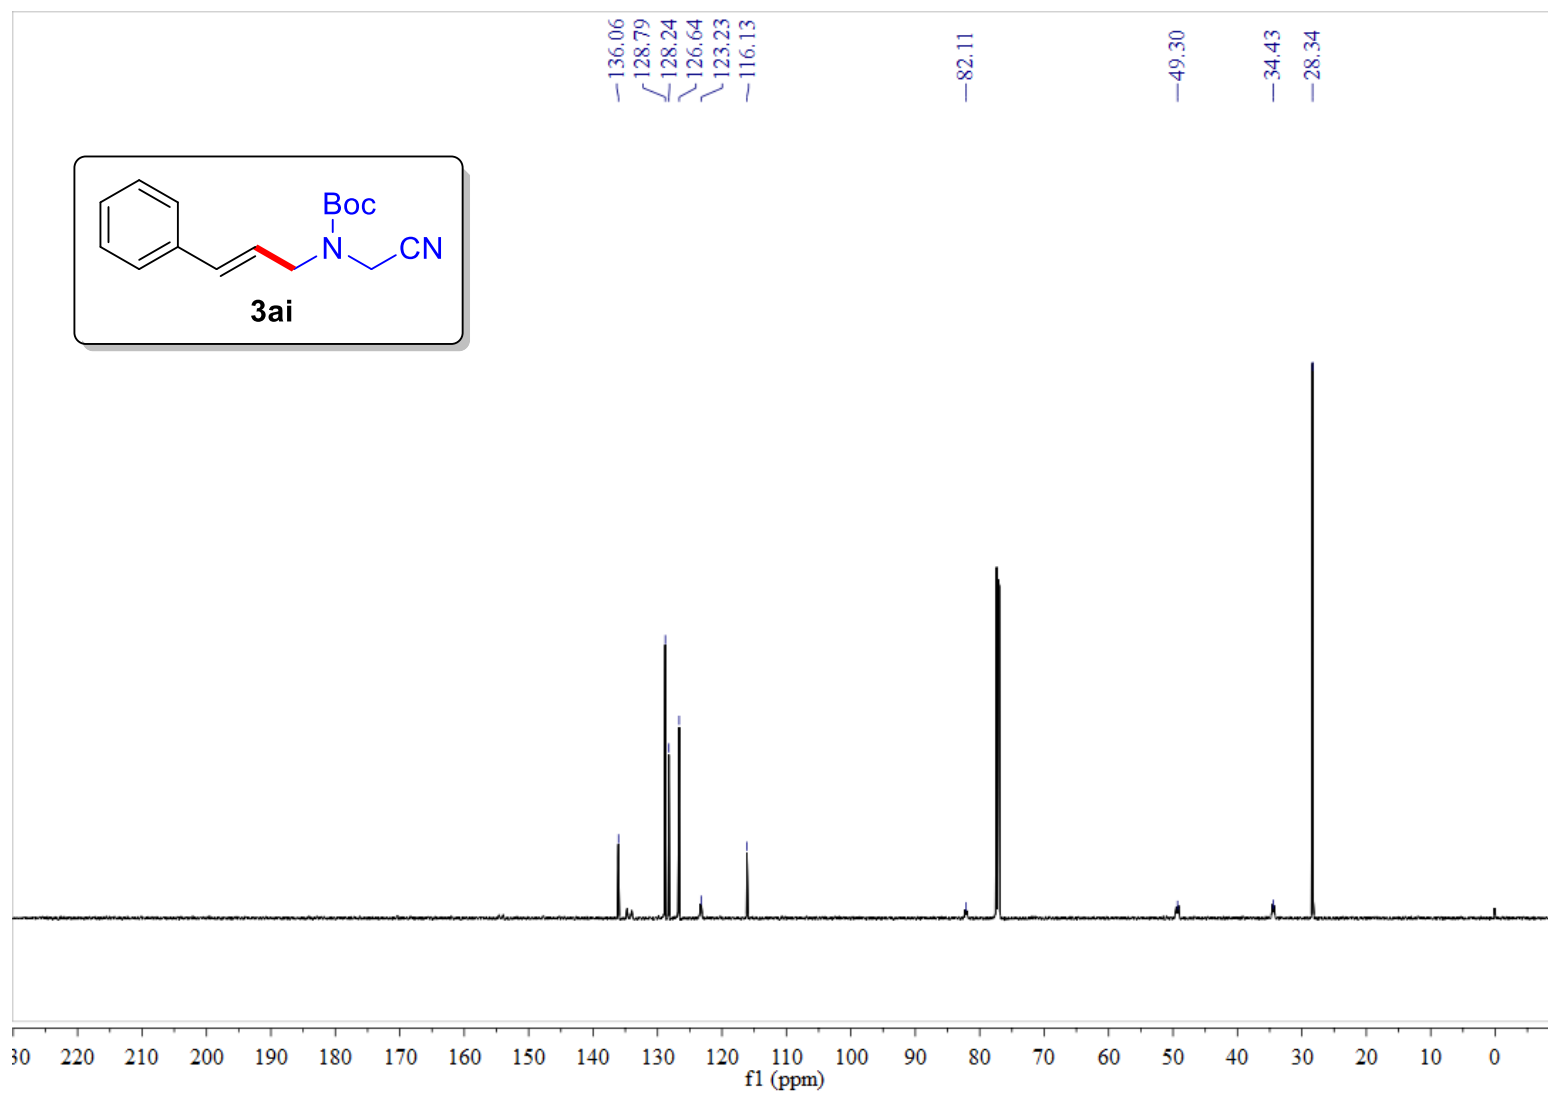

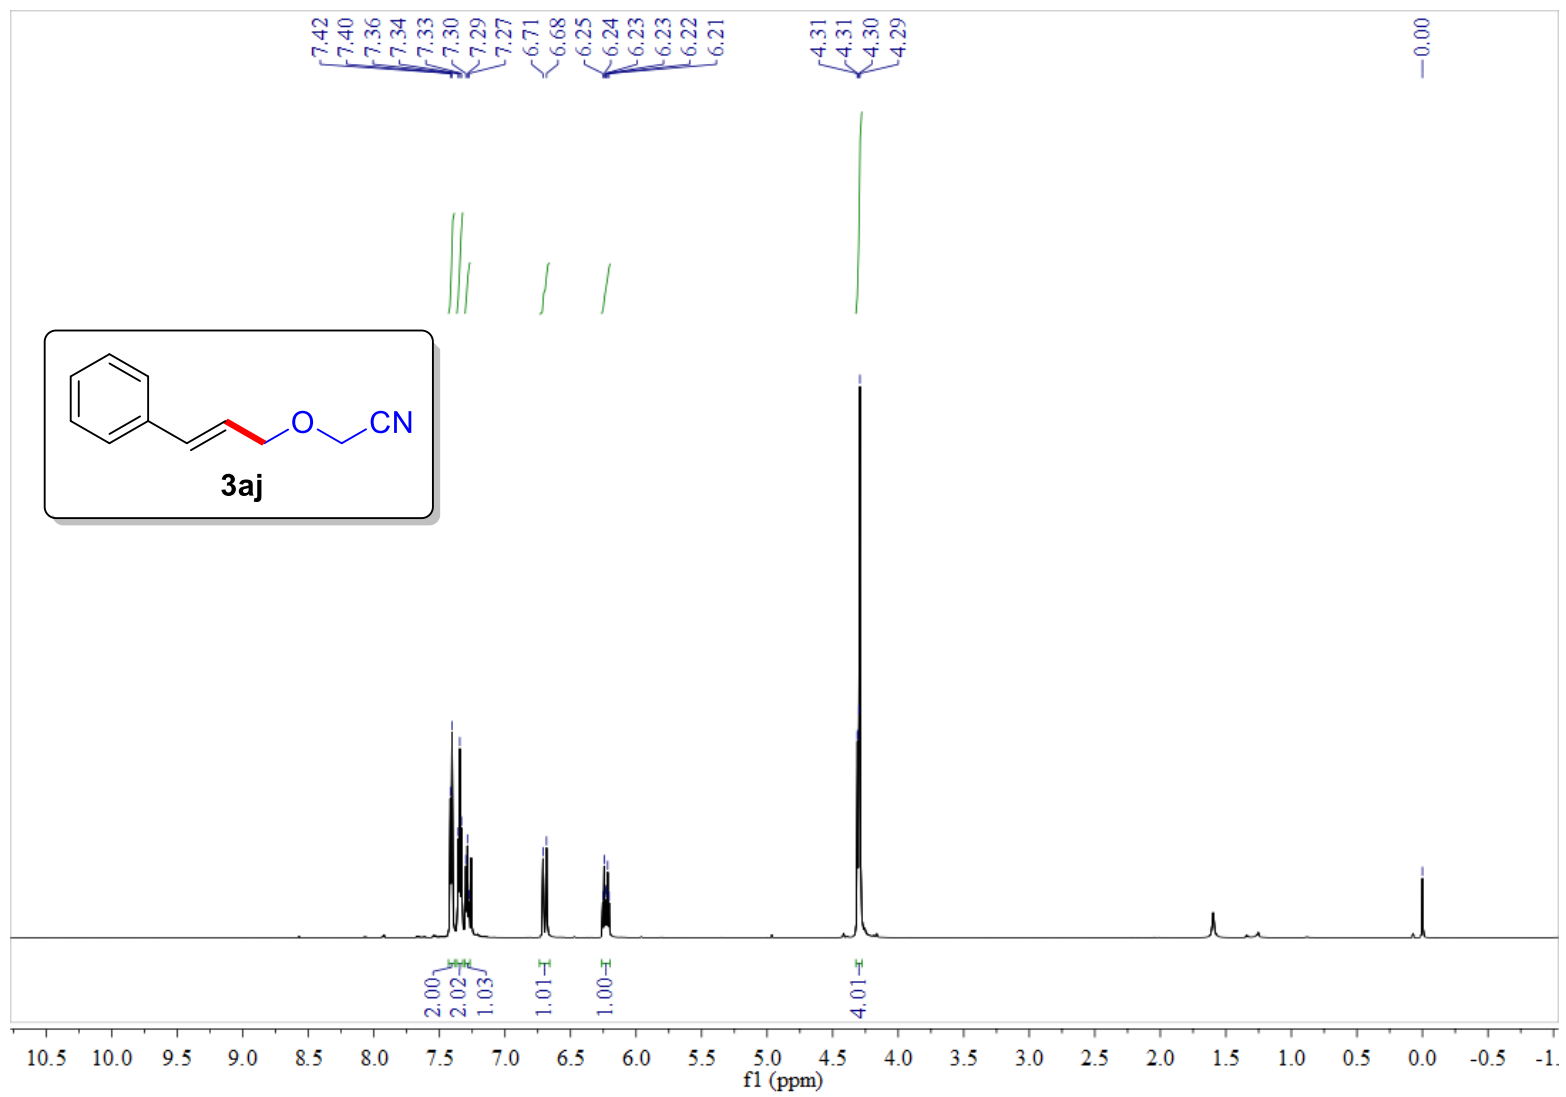

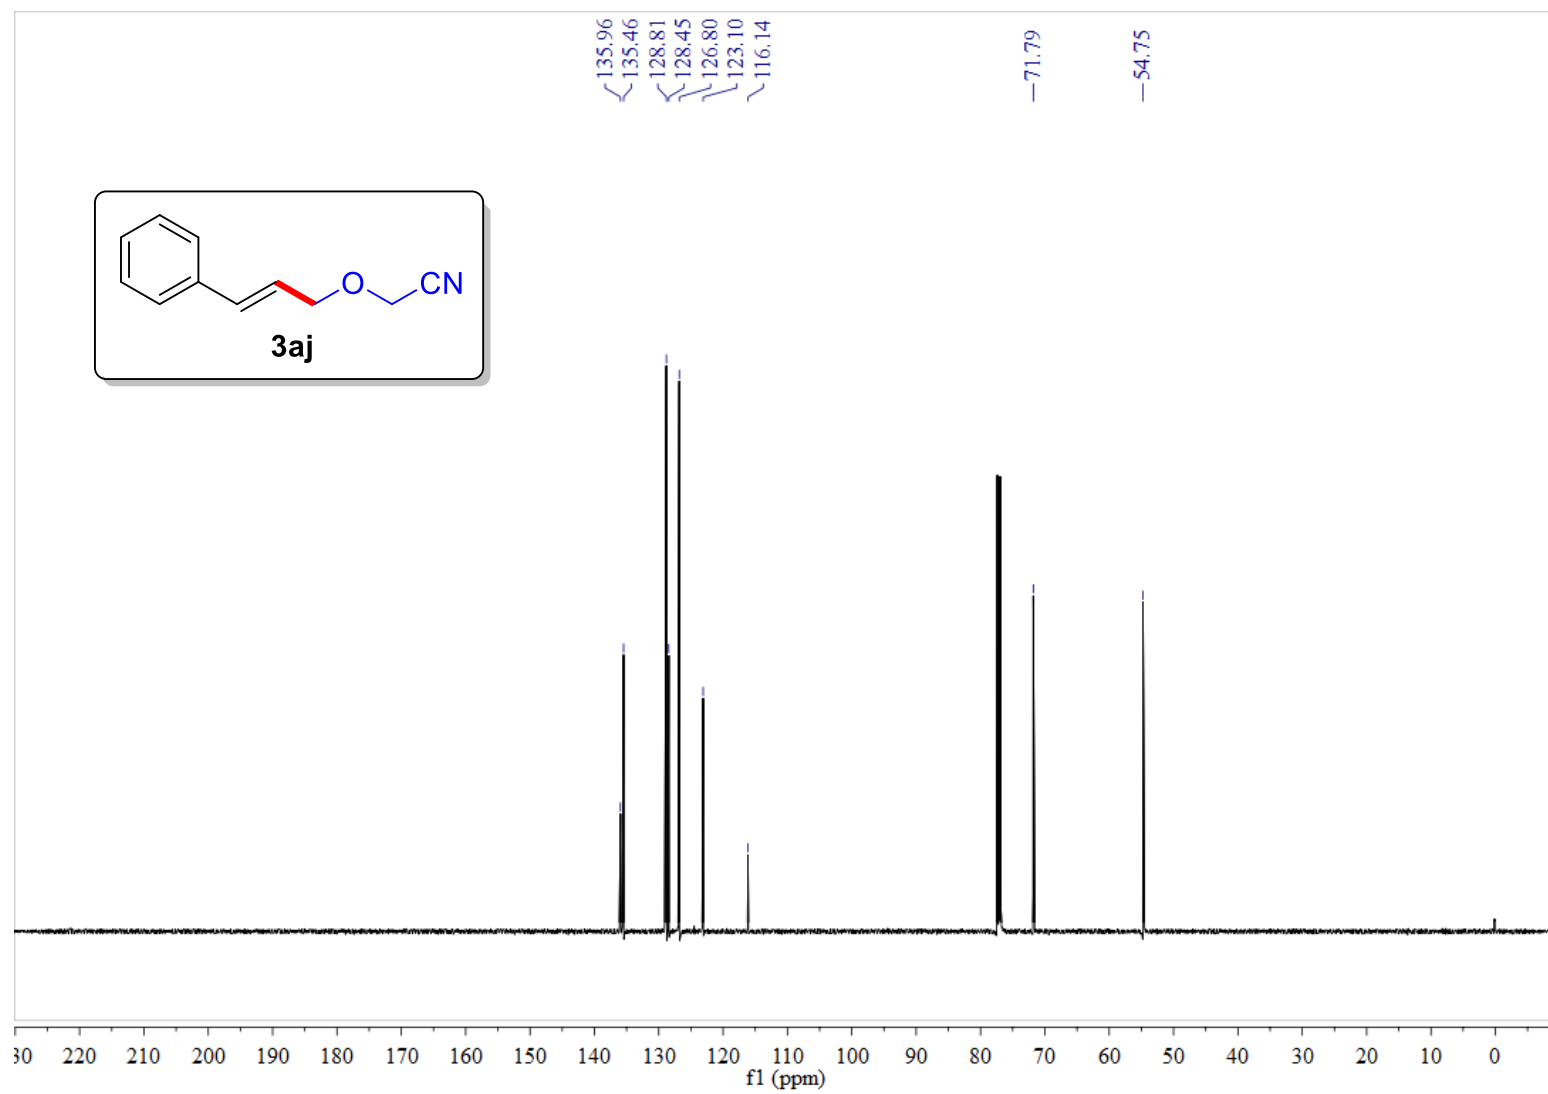

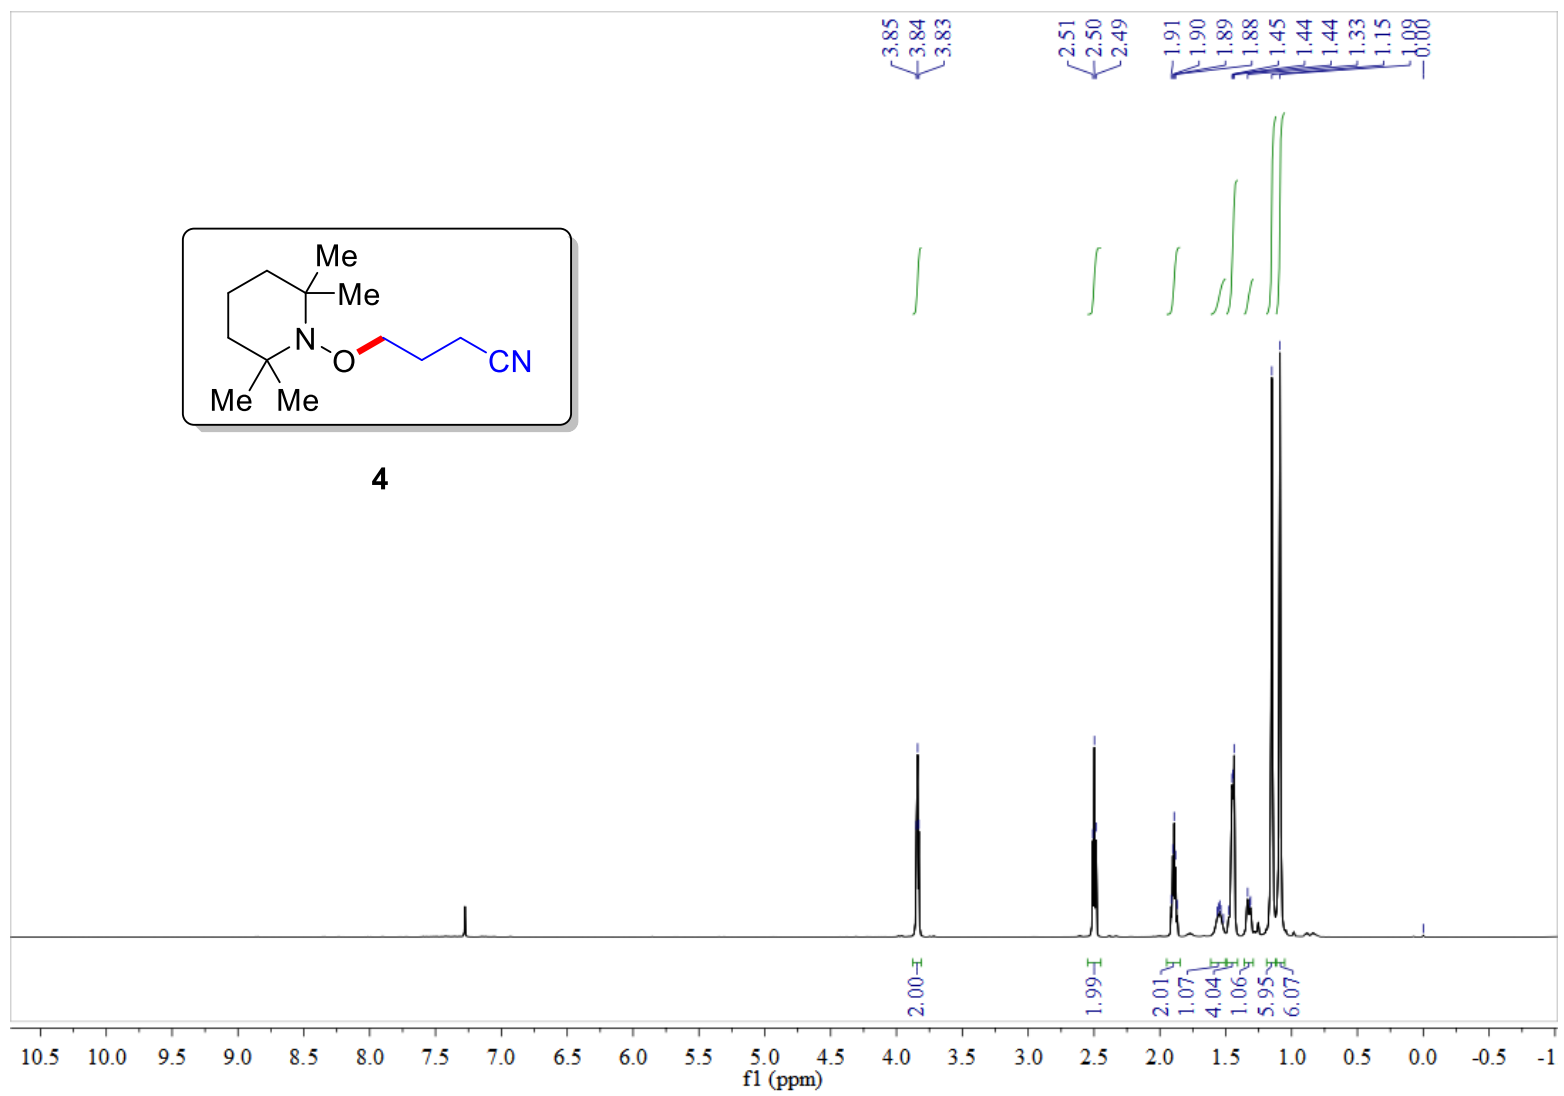

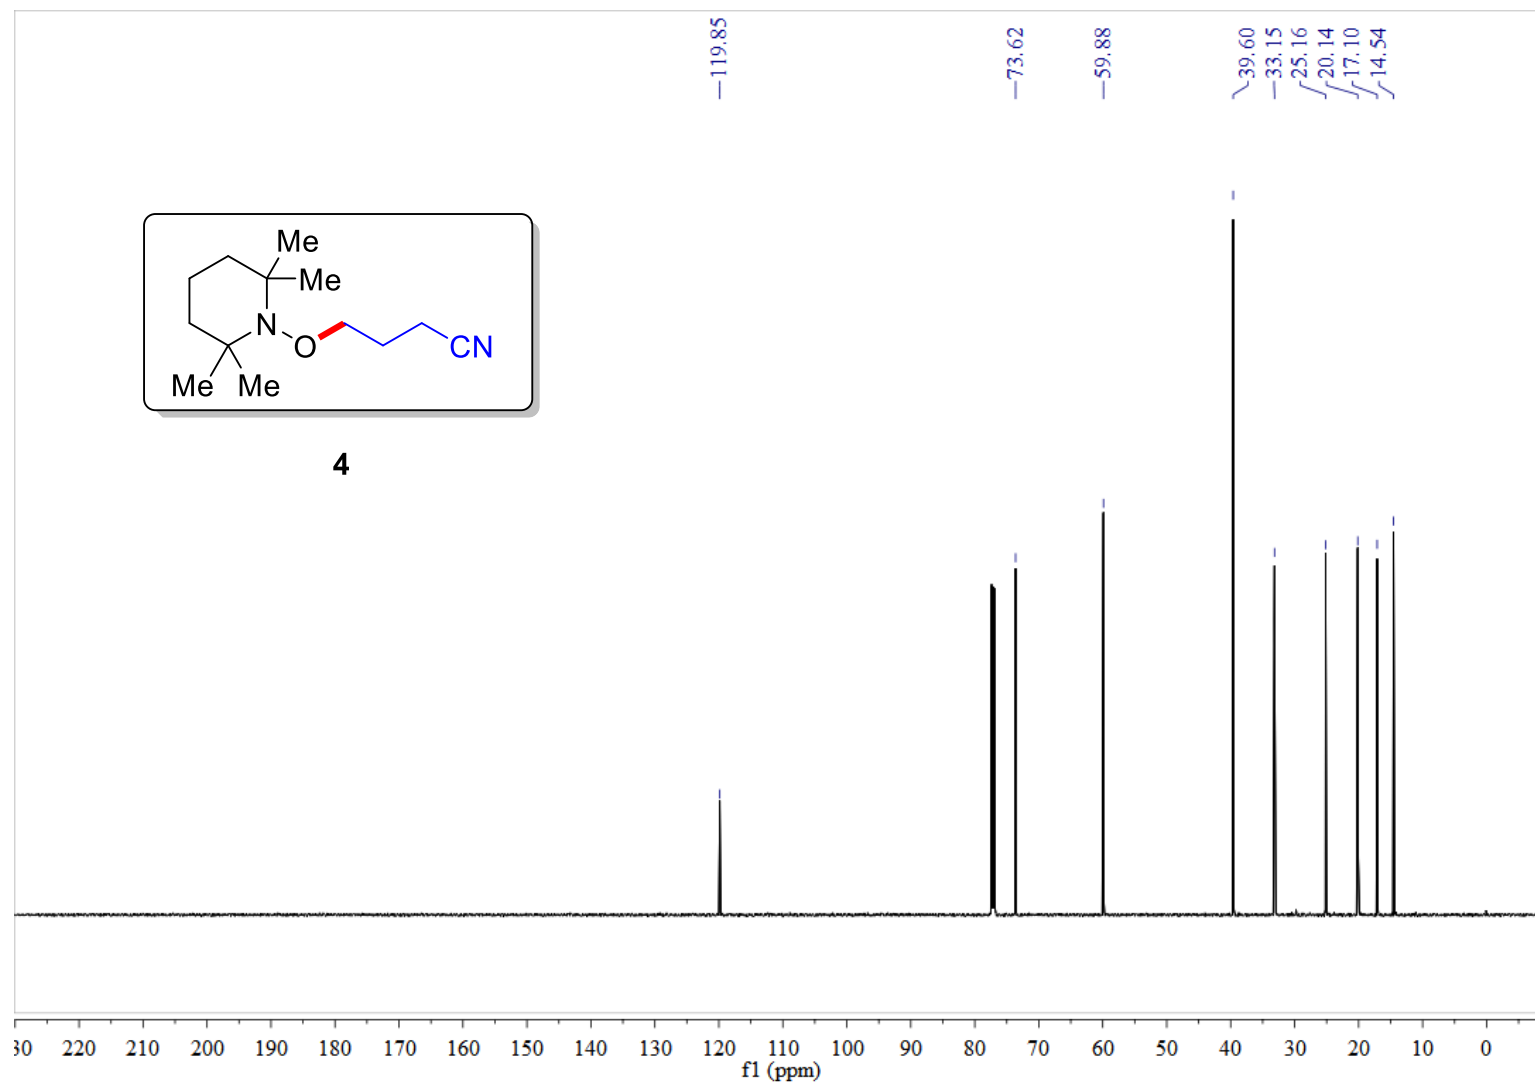

Supplement: d2qo00992g1.pdf [file d2qo00992g1.pdf]
